# Supplementary material for: The methanol electrooxidation activity and the CO-resilient surface of a La x Fe 1− y − z Cu y Pd z O 3 perovskite
Source: Royal Society of Chemistry journal article supplement (doi:10.1039/d5ta04846j), 2026-01-01
Supplement: d5ta04846j1.xlsx [file d5ta04846j1.xlsx]

## Sheet: Feuil1
			Distance_(nm)	Gray_Value
			0	99
			0.00927	104.634
			0.01855	117.22
			0.02782	119.201
			0.03709	118.521
			0.04637	124.18
			0.05564	135.921
			0.06491	147.039
			0.07419	148.91
			0.08346	161.329
			0.09274	166.819
			0.10201	182.751
			0.11128	198.713
			0.12056	192.344
			0.12983	177.15
			0.1391	164.466
			0.14838	135.567
			0.15765	132.469
			0.16692	124.377
			0.1762	112.596
			0.18547	93.462
			0.19474	78.33
			0.20402	76.278
			0.21329	70.38
			0.22257	73.878
			0.23184	69.685
			0.24111	69.12
			0.25039	74.478
			0.25966	77.398
			0.26893	84.56
			0.27821	92.944
			0.28748	95.962
			0.29675	99.254
			0.30603	107.049
			0.3153	113.603
			0.32457	127.888
			0.33385	144.725
			0.34312	144.197
			0.3524	168.471
			0.36167	182.464
			0.37094	197.578
			0.38022	214.287
			0.38949	222.467
			0.39876	221.984
			0.40804	223.352
			0.41731	218.597
			0.42658	202.616
			0.43586	163.874
			0.44513	141.341
			0.4544	125.695
			0.46368	105.902
			0.47295	78.208
			0.48223	66.94
			0.4915	54.888
			0.50077	62.501
			0.51005	70.405
			0.51932	65.531
			0.52859	68.416
			0.53787	90.728
			0.54714	97.313
			0.55641	96.623
			0.56569	104.42
			0.57496	118.417
			0.58423	131.429
			0.59351	148.636
			0.60278	158.538
			0.61206	169.182
			0.62133	184.207
			0.6306	186.926
			0.63988	204.278
			0.64915	205.944
			0.65842	203.645
			0.6677	185.337
			0.67697	165.603
			0.68624	147.167
			0.69552	115.112
			0.70479	114.836
			0.71406	95.696
			0.72334	77.968
			0.73261	64.87
			0.74189	71.538
			0.75116	70.294
			0.76043	62.021
			0.76971	62.411
			0.77898	67.264
			0.78825	77.295
			0.79753	96.826
			0.8068	96.483
			0.81607	105.044
			0.82535	117.675
			0.83462	128.389
			0.84389	128.215
			0.85317	137.156
			0.86244	147.532
			0.87172	159.018
			0.88099	182.733
			0.89026	205.713
			0.89954	198.488
			0.90881	204.712
			0.91808	207.209
			0.92736	205.387
			0.93663	206.017
			0.9459	202.135
			0.95518	201.192
			0.96445	183.289
			0.97372	163.838
			0.983	131.396
			0.99227	114.335
			1.00155	90.894
			1.01082	78.974
			1.02009	69.59
			1.02937	64.177
			1.03864	68.104
			1.04791	69.03
			1.05719	73.279
			1.06646	72.513
			1.07573	70.182
			1.08501	78.487
			1.09428	88.069
			1.10355	97.703
			1.11283	94.919
			1.1221	94.106
			1.13138	102.997
			1.14065	120.337
			1.14992	118.006
			1.1592	138.857
			1.16847	157.115
			1.17774	166.442
			1.18702	180.318
			1.19629	204.434
			1.20556	219.039
			1.21484	222.462
			1.22411	222.19
			1.23338	208.44
			1.24266	194.188
			1.25193	194.564
			1.26121	179.955
			1.27048	167.042
			1.27975	139.721
			1.28903	105.894
			1.2983	103.056
			1.30757	92
			1.31685	91.98
			1.32612	78.198
			1.33539	76.102
			1.34467	69.652
			1.35394	65.837
			1.36321	68.711
			1.37249	75.514
			1.38176	70.086
			1.39104	85.12
			1.40031	107.216
			1.40958	112.9
			1.41886	115.573
			1.42813	128.496
			1.4374	126.06
			1.44668	131.859
			1.45595	151.873
			1.46522	183.41
			1.4745	211.724
			1.48377	203.623
			1.49304	210.519
			1.50232	210.981
			1.51159	200.465
			1.52087	180.414
			1.53014	180.261
			1.53941	182.377
			1.54869	156.507
			1.55796	131.311
			1.56723	107.83
			1.57651	79.467
			1.58578	51.957
			1.59505	55.075
			1.60433	58.808
			1.6136	62.166
			1.62287	64.304
			1.63215	57.234
			1.64142	71.606
			1.6507	67.538
			1.65997	71.647
			1.66924	79.431
			1.67852	83.694
			1.68779	93.772
			1.69706	108.38
			1.70634	122.095
			1.71561	125.649
			1.72488	147.676
			1.73416	170.07
			1.74343	170.975
			1.7527	179.281
			1.76198	170.571
			1.77125	171.549
			1.78053	175.326
			1.7898	189.874
			1.79907	185.463
			1.80835	183.986
			1.81762	193.21
			1.82689	201.285
			1.83617	164.577
			1.84544	132.548
			1.85471	118.98
			1.86399	102.437
			1.87326	80.394
			1.88253	78.159
			1.89181	74.932
			1.90108	67.111
			1.91036	65.797
			1.91963	74.643
			1.9289	83.907
			1.93818	98.882
			1.94745	102.972
			1.95672	100.448
			1.966	117.844
			1.97527	125.502
			1.98454	136.862
			1.99382	153.521
			2.00309	163.32
			2.01236	177.992
			2.02164	190.214
			2.03091	196.046
			2.04019	208.689
			2.04946	194.848
			2.05873	176.076
			2.06801	170.004
			2.07728	145.98
			2.08655	131.373
			2.09583	113.778
			2.1051	95.292
			2.11437	79.718
			2.12365	70.735
			2.13292	71.668
			2.14219	69.204
			2.15147	58.377
			2.16074	63.452
			2.17002	65.622
			2.17929	67.044
			2.18856	79.806
			2.19784	84.564
			2.20711	86.464
			2.21638	87.178
			2.22566	82.819
			2.23493	105.184
			2.2442	122.699
			2.25348	131.191
			2.26275	150.409
			2.27202	149.529
			2.2813	158.225
			2.29057	162.904
			2.29985	169.219
			2.30912	181.386
			2.31839	177.163
			2.32767	181.662
			2.33694	184.445
			2.34621	176.446
			2.35549	162.701
			2.36476	149.522
			2.37403	142.459
			2.38331	118.314
			2.39258	109.043
			2.40185	96.757
			2.41113	83.531
			2.4204	71.587
			2.42968	71.526
			2.43895	55.1
			2.44822	51.229
			2.4575	58.917
			2.46677	68.747
			2.47604	55.742
			2.48532	68.469
			2.49459	77.295
			2.50386	78.966
			2.51314	99.505
			2.52241	122.958
			2.53168	126.07
			2.54096	139.654
			2.55023	151.402
			2.55951	158.598
			2.56878	161.156
			2.57805	167.04
			2.58733	177.425
			2.5966	177.046
			2.60587	180.193
			2.61515	195.842
			2.62442	199.801
			2.63369	189.39
			2.64297	190.833
			2.65224	175.198
			2.66151	147.815
			2.67079	145.817
			2.68006	143.256
			2.68934	108.789
			2.69861	84.316
			2.70788	79.733
			2.71716	69.196
			2.72643	66.25
			2.7357	71.159
			2.74498	78.078
			2.75425	75.11
			2.76352	79.301
			2.7728	81.028
			2.78207	87.43
			2.79134	91.996
			2.80062	89.223
			2.80989	103.303
			2.81917	122.645
			2.82844	134.27
			2.83771	141.513
			2.84699	147.471
			2.85626	158.234
			2.86553	167.854
			2.87481	198.04
			2.88408	193.779
			2.89335	204.516
			2.90263	214.728
			2.9119	204.468
			2.92117	191.566
			2.93045	191.635
			2.93972	186.33
			2.949	175.212
			2.95827	162.315
			2.96754	143.816
			2.97682	106.666
			2.98609	96.231
			2.99536	95.638
			3.00464	85.509
			3.01391	74.829
			3.02318	77.156
			3.03246	70.227
			3.04173	68.323
			3.051	73.411
			3.06028	80.546
			3.06955	79.232
			3.07883	82.215
			3.0881	93.228
			3.09737	112.192
			3.10665	128.155
			3.11592	130.637
			3.12519	138.192
			3.13447	141.614
			3.14374	155.219
			3.15301	166.517
			3.16229	173.259
			3.17156	186.95
			3.18083	186.221
			3.19011	185.159
			3.19938	195.639
			3.20866	199.378
			3.21793	180.581
			3.2272	168.259
			3.23648	147.191
			3.24575	132.23
			3.25502	129.969
			3.2643	96.441
			3.27357	88.286
			3.28284	85.504
			3.29212	75.835
			3.30139	75.145
			3.31066	73.632
			3.31994	79.191
			3.32921	79.124
			3.33849	81.164
			3.34776	84.83
			3.35703	93.388
			3.36631	99.56
			3.37558	103.386
			3.38485	111.984
			3.39413	118.302
			3.4034	133.103
			3.41267	138.91
			3.42195	151.757
			3.43122	167.635
			3.44049	185.142
			3.44977	193.51
			3.45904	210
