# Supplementary material for: The methanol electrooxidation activity and the CO-resilient surface of a La x Fe 1− y − z Cu y Pd z O 3 perovskite
Source: Royal Society of Chemistry journal article supplement (doi:10.1039/d5ta04846j), 2026-01-01
Supplement: d5ta04846j2.xlsx [file d5ta04846j2.xlsx]

## Sheet: Hoja1
		CC6230
		La0,85Fe0,9Cu0,05Pd0,05O3
		10	0	2000
		10.0501	-0.372391	1999.63
		10.1002	0.0362403	2000.04
		10.1503	-0.468745	1999.53
		10.2004	-0.12968	1999.87
		10.2505	0.110873	2000.11
		10.3006	-0.171565	1999.83
		10.3508	-0.0134527	1999.99
		10.4009	-0.0345819	1999.97
		10.451	-0.104744	1999.9
		10.5011	-0.0963352	1999.9
		10.5512	0.0557491	2000.06
		10.6013	-0.250054	1999.75
		10.6514	0.244069	2000.24
		10.7015	-0.0816753	1999.92
		10.7516	-0.00593139	1999.99
		10.8017	-0.0156788	1999.98
		10.8518	0.0140825	2000.01
		10.9019	0.0547066	2000.05
		10.9521	-0.193286	1999.81
		11.0022	0.176356	2000.18
		11.0523	-0.174911	1999.83
		11.1024	-0.158544	1999.84
		11.1525	0.0145195	2000.01
		11.2026	0.109904	2000.11
		11.2527	-0.26562	1999.73
		11.3028	-0.131956	1999.87
		11.3529	-0.109825	1999.89
		11.403	0.084627	2000.08
		11.4531	-0.137141	1999.86
		11.5032	-0.142318	1999.86
		11.5534	0.285243	2000.29
		11.6035	0.26273	2000.26
		11.6536	0.123475	2000.12
		11.7037	0.0419586	2000.04
		11.7538	0.148388	2000.15
		11.8039	-0.0676532	1999.93
		11.854	-0.093144	1999.91
		11.9041	0.254207	2000.25
		11.9542	-0.254766	1999.75
		12.0043	0.0361855	2000.04
		12.0544	0.254667	2000.25
		12.1045	-0.140989	1999.86
		12.1547	0.0210929	2000.02
		12.2048	-0.154921	1999.85
		12.2549	-0.0876192	1999.91
		12.305	0.201482	2000.2
		12.3551	-0.113136	1999.89
		12.4052	0.0544618	2000.05
		12.4553	0.016777	2000.02
		12.5054	0.135788	2000.14
		12.5555	-0.200483	1999.8
		12.6056	0.523587	2000.52
		12.6557	0.0814368	2000.08
		12.7058	-0.0555797	1999.94
		12.7559	0.00316242	2000
		12.8061	0.00245491	2000
		12.8562	0.260006	2000.26
		12.9063	0.270608	2000.27
		12.9564	0.000405208	2000
		13.0065	0.251482	2000.25
		13.0566	-0.184494	1999.82
		13.1067	0.286225	2000.29
		13.1568	0.0646825	2000.06
		13.2069	-0.0704766	1999.93
		13.257	-0.150502	1999.85
		13.3071	0.0191701	2000.02
		13.3572	0.0122049	2000.01
		13.4074	0.286936	2000.29
		13.4575	0.153259	2000.15
		13.5076	0.0981529	2000.1
		13.5577	0.0565141	2000.06
		13.6078	-0.114887	1999.89
		13.6579	-0.0592793	1999.94
		13.708	0.197295	2000.2
		13.7581	0.167858	2000.17
		13.8082	0.0841789	2000.08
		13.8583	0.310842	2000.31
		13.9084	-0.0349654	1999.97
		13.9585	-0.106889	1999.89
		14.0087	0.417988	2000.42
		14.0588	0.102164	2000.1
		14.1089	0.414392	2000.41
		14.159	0.0447735	2000.04
		14.2091	0.0219557	2000.02
		14.2592	-0.0733327	1999.93
		14.3093	0.170367	2000.17
		14.3594	-0.153196	1999.85
		14.4095	0.221604	2000.22
		14.4596	-0.155754	1999.84
		14.5097	0.188689	2000.19
		14.5598	0.0127439	2000.01
		14.6099	-0.22265	1999.78
		14.6601	-0.0237339	1999.98
		14.7102	0.303233	2000.3
		14.7603	0.130646	2000.13
		14.8104	-0.062328	1999.94
		14.8605	-0.0204809	1999.98
		14.9106	0.0999373	2000.1
		14.9607	0.0280934	2000.03
		15.0108	0.0426331	2000.04
		15.0609	-0.267902	1999.73
		15.111	0.231905	2000.23
		15.1611	-0.0360707	1999.96
		15.2112	-0.144746	1999.86
		15.2614	-0.146205	1999.85
		15.3115	0.12772	2000.13
		15.3616	0.011466	2000.01
		15.4117	-0.244967	1999.76
		15.4618	0.298526	2000.3
		15.5119	0.18361	2000.18
		15.562	0.0743494	2000.07
		15.6121	-0.0318612	1999.97
		15.6622	0.130603	2000.13
		15.7123	0.0591394	2000.06
		15.7624	0.100101	2000.1
		15.8125	0.0347371	2000.03
		15.8627	0.0870073	2000.09
		15.9128	0.202224	2000.2
		15.9629	-0.0545096	1999.95
		16.013	0.236078	2000.24
		16.0631	0.222425	2000.22
		16.1132	-0.0902617	1999.91
		16.1633	-0.14469	1999.86
		16.2134	0.0554753	2000.06
		16.2635	-0.184018	1999.82
		16.3136	-0.035044	1999.96
		16.3637	0.0857302	2000.09
		16.4138	0.058513	2000.06
		16.464	-0.0125288	1999.99
		16.5141	-0.0180203	1999.98
		16.5642	-0.0517115	1999.95
		16.6143	-0.0901648	1999.91
		16.6644	-0.0734844	1999.93
		16.7145	0.0972879	2000.1
		16.7646	-0.0465978	1999.95
		16.8147	-0.0858706	1999.91
		16.8648	0.0393652	2000.04
		16.9149	0.0582764	2000.06
		16.965	-0.057783	1999.94
		17.0151	-0.155167	1999.84
		17.0652	0.211437	2000.21
		17.1154	-0.043909	1999.96
		17.1655	-0.00714201	1999.99
		17.2156	-0.144408	1999.86
		17.2657	-0.003991	2000
		17.3158	-0.269378	1999.73
		17.3659	0.325057	2000.33
		17.416	-0.0175629	1999.98
		17.4661	0.288701	2000.29
		17.5162	0.306349	2000.31
		17.5663	-0.0948277	1999.91
		17.6164	-0.0346209	1999.97
		17.6665	0.0312405	2000.03
		17.7167	0.081923	2000.08
		17.7668	0.04451	2000.04
		17.8169	-0.0783944	1999.92
		17.867	-0.0133525	1999.99
		17.9171	0.0729688	2000.07
		17.9672	-0.0381803	1999.96
		18.0173	0.0412208	2000.04
		18.0674	0.233047	2000.23
		18.1175	-0.0981175	1999.9
		18.1676	0.0555388	2000.06
		18.2177	-0.144525	1999.86
		18.2678	-0.0648948	1999.94
		18.318	0.171432	2000.17
		18.3681	-0.055337	1999.94
		18.4182	-0.0394722	1999.96
		18.4683	0.11486	2000.11
		18.5184	-0.102758	1999.9
		18.5685	-0.137638	1999.86
		18.6186	0.187303	2000.19
		18.6687	0.0856069	2000.09
		18.7188	0.166649	2000.17
		18.7689	-0.0461341	1999.95
		18.819	0.225904	2000.23
		18.8691	-0.215153	1999.78
		18.9193	0.104653	2000.1
		18.9694	-0.124575	1999.88
		19.0195	0.0919567	2000.09
		19.0696	0.0797675	2000.08
		19.1197	0.00031612	2000
		19.1698	0.173915	2000.17
		19.2199	0.220356	2000.22
		19.27	-0.214528	1999.79
		19.3201	0.205202	2000.21
		19.3702	0.0133976	2000.01
		19.4203	0.178811	2000.18
		19.4704	0.196233	2000.2
		19.5205	0.214101	2000.21
		19.5707	0.440748	2000.44
		19.6208	0.201696	2000.2
		19.6709	0.215694	2000.22
		19.721	-0.0224659	1999.98
		19.7711	-0.0961171	1999.9
		19.8212	-0.140676	1999.86
		19.8713	0.00791893	2000.01
		19.9214	0.0163354	2000.02
		19.9715	0.025198	2000.03
		20.0216	-0.124347	1999.88
		20.0717	0.119783	2000.12
		20.1218	0.135192	2000.14
		20.172	-0.151036	1999.85
		20.2221	-0.140306	1999.86
		20.2722	0.0896192	2000.09
		20.3223	0.129887	2000.13
		20.3724	0.191434	2000.19
		20.4225	0.112802	2000.11
		20.4726	-0.0825713	1999.92
		20.5227	0.024585	2000.02
		20.5728	0.0879167	2000.09
		20.6229	-0.0878888	1999.91
		20.673	0.0935227	2000.09
		20.7231	0.152985	2000.15
		20.7733	0.350913	2000.35
		20.8234	0.385226	2000.39
		20.8735	0.526755	2000.53
		20.9236	0.0619602	2000.06
		20.9737	-0.191451	1999.81
		21.0238	0.0790209	2000.08
		21.0739	0.235356	2000.24
		21.124	0.0926578	2000.09
		21.1741	0.0493643	2000.05
		21.2242	0.329434	2000.33
		21.2743	0.125574	2000.13
		21.3244	0.310182	2000.31
		21.3745	0.0342978	2000.03
		21.4247	0.284902	2000.28
		21.4748	0.387514	2000.39
		21.5249	0.495782	2000.5
		21.575	0.385745	2000.39
		21.6251	0.257925	2000.26
		21.6752	0.72951	2000.73
		21.7253	0.300499	2000.3
		21.7754	0.660997	2000.66
		21.8255	0.917775	2000.92
		21.8756	1.06823	2001.07
		21.9257	0.825897	2000.83
		21.9758	1.00068	2001
		22.026	1.62903	2001.63
		22.0761	1.87242	2001.87
		22.1262	1.92614	2001.93
		22.1763	2.42823	2002.43
		22.2264	3.63649	2003.64
		22.2765	4.72281	2004.72
		22.3266	6.13769	2006.14
		22.3767	9.23792	2009.24
		22.4268	13.3777	2013.38
		22.4769	19.0934	2019.09
		22.527	27.859	2027.86
		22.5771	38.0391	2038.04
		22.6273	44.0478	2044.05
		22.6774	41.9658	2041.97
		22.7275	31.0223	2031.02
		22.7776	20.785	2020.78
		22.8277	13.3137	2013.31
		22.8778	9.00171	2009
		22.9279	5.56257	2005.56
		22.978	4.14471	2004.14
		23.0281	2.95387	2002.95
		23.0782	2.07076	2002.07
		23.1283	1.95632	2001.96
		23.1784	1.51681	2001.52
		23.2286	1.24962	2001.25
		23.2787	0.972466	2000.97
		23.3288	0.716586	2000.72
		23.3789	0.692924	2000.69
		23.429	0.625437	2000.63
		23.4791	0.532355	2000.53
		23.5292	0.364198	2000.36
		23.5793	0.251174	2000.25
		23.6294	0.313076	2000.31
		23.6795	0.427508	2000.43
		23.7296	0.164781	2000.16
		23.7797	0.345209	2000.35
		23.8298	0.0521248	2000.05
		23.88	0.0928201	2000.09
		23.9301	-0.103018	1999.9
		23.9802	0.350028	2000.35
		24.0303	0.165499	2000.17
		24.0804	-0.0654581	1999.93
		24.1305	-0.00951124	1999.99
		24.1806	-0.151035	1999.85
		24.2307	-0.00424313	2000
		24.2808	-0.0210678	1999.98
		24.3309	0.124012	2000.12
		24.381	-0.220045	1999.78
		24.4311	-0.122755	1999.88
		24.4813	-0.00998953	1999.99
		24.5314	0.0146809	2000.01
		24.5815	0.0397975	2000.04
		24.6316	-0.0622439	1999.94
		24.6817	-0.0180059	1999.98
		24.7318	0.0969909	2000.1
		24.7819	0.261913	2000.26
		24.832	0.0835312	2000.08
		24.8821	0.168616	2000.17
		24.9322	0.420815	2000.42
		24.9823	0.79325	2000.79
		25.0324	1.06717	2001.07
		25.0826	1.30509	2001.31
		25.1327	1.91584	2001.92
		25.1828	2.32131	2002.32
		25.2329	2.94337	2002.94
		25.283	3.21692	2003.22
		25.3331	3.37373	2003.37
		25.3832	3.36692	2003.37
		25.4333	2.73296	2002.73
		25.4834	2.22704	2002.23
		25.5335	1.97418	2001.97
		25.5836	1.32593	2001.33
		25.6337	0.941143	2000.94
		25.6839	0.910971	2000.91
		25.734	0.409891	2000.41
		25.7841	0.648841	2000.65
		25.8342	0.396049	2000.4
		25.8843	0.200995	2000.2
		25.9344	0.0740958	2000.07
		25.9845	0.0205592	2000.02
		26.0346	0.220073	2000.22
		26.0847	-0.0929881	1999.91
		26.1348	0.10221	2000.1
		26.1849	-0.0563131	1999.94
		26.235	-0.0399106	1999.96
		26.2851	-0.0204577	1999.98
		26.3353	0.0645455	2000.06
		26.3854	0.074474	2000.07
		26.4355	0.0822445	2000.08
		26.4856	-0.00328876	2000
		26.5357	-0.00504257	1999.99
		26.5858	0.311358	2000.31
		26.6359	0.0761217	2000.08
		26.686	0.0522689	2000.05
		26.7361	0.0939664	2000.09
		26.7862	0.0241309	2000.02
		26.8363	-0.0660917	1999.93
		26.8864	-0.106389	1999.89
		26.9366	-0.00751286	1999.99
		26.9867	0.0397262	2000.04
		27.0368	-0.00633863	1999.99
		27.0869	0.156376	2000.16
		27.137	-0.00598391	1999.99
		27.1871	-0.102794	1999.9
		27.2372	-0.0559279	1999.94
		27.2873	0.0721132	2000.07
		27.3374	0.257892	2000.26
		27.3875	0.110784	2000.11
		27.4376	0.0214132	2000.02
		27.4877	-0.0883444	1999.91
		27.5379	-0.103906	1999.9
		27.588	-0.000567515	2000
		27.6381	0.00686289	2000.01
		27.6882	0.085052	2000.09
		27.7383	-0.0316253	1999.97
		27.7884	0.224539	2000.22
		27.8385	0.0462545	2000.05
		27.8886	0.0767491	2000.08
		27.9387	-0.121477	1999.88
		27.9888	0.12866	2000.13
		28.0389	-0.0244027	1999.98
		28.089	-0.0988943	1999.9
		28.1392	0.0327894	2000.03
		28.1893	-0.0746641	1999.93
		28.2394	-0.103546	1999.9
		28.2895	-0.0438279	1999.96
		28.3396	0.13092	2000.13
		28.3897	-0.0246149	1999.98
		28.4398	-0.0338705	1999.97
		28.4899	-0.0973673	1999.9
		28.54	0.227603	2000.23
		28.5901	-0.0797934	1999.92
		28.6402	-0.102889	1999.9
		28.6903	0.0437331	2000.04
		28.7404	-0.0279483	1999.97
		28.7906	0.0622748	2000.06
		28.8407	0.0644024	2000.06
		28.8908	0.290934	2000.29
		28.9409	0.0934335	2000.09
		28.991	0.300025	2000.3
		29.0411	0.462791	2000.46
		29.0912	0.227566	2000.23
		29.1413	0.102162	2000.1
		29.1914	0.0188714	2000.02
		29.2415	-0.139494	1999.86
		29.2916	0.127065	2000.13
		29.3417	-0.0564494	1999.94
		29.3919	-0.104102	1999.9
		29.442	0.0134614	2000.01
		29.4921	-0.0247795	1999.98
		29.5422	0.122322	2000.12
		29.5923	0.0771606	2000.08
		29.6424	0.0610916	2000.06
		29.6925	0.115781	2000.12
		29.7426	0.147479	2000.15
		29.7927	0.0806656	2000.08
		29.8428	0.0038812	2000
		29.8929	-0.00735285	1999.99
		29.943	0.341234	2000.34
		29.9932	0.247559	2000.25
		30.0433	0.195997	2000.2
		30.0934	0.35061	2000.35
		30.1435	0.42494	2000.42
		30.1936	0.2393	2000.24
		30.2437	0.374418	2000.37
		30.2938	0.322482	2000.32
		30.3439	0.505368	2000.51
		30.394	0.613179	2000.61
		30.4441	0.544353	2000.54
		30.4942	0.817119	2000.82
		30.5443	0.975747	2000.98
		30.5944	1.02545	2001.03
		30.6446	1.49226	2001.49
		30.6947	1.22775	2001.23
		30.7448	1.70847	2001.71
		30.7949	2.12194	2002.12
		30.845	2.28324	2002.28
		30.8951	2.14812	2002.15
		30.9452	2.51084	2002.51
		30.9953	2.34796	2002.35
		31.0454	3.0423	2003.04
		31.0955	3.26313	2003.26
		31.1456	3.51826	2003.52
		31.1957	3.98737	2003.99
		31.2459	4.496	2004.5
		31.296	4.94778	2004.95
		31.3461	5.86615	2005.87
		31.3962	6.44643	2006.45
		31.4463	7.63131	2007.63
		31.4964	9.13175	2009.13
		31.5465	10.6821	2010.68
		31.5966	12.5637	2012.56
		31.6467	15.0472	2015.05
		31.6968	18.3932	2018.39
		31.7469	24.0755	2024.08
		31.797	30.2323	2030.23
		31.8472	40.59	2040.59
		31.8973	54.844	2054.84
		31.9474	74.0646	2074.06
		31.9975	103.127	2103.13
		32.0476	141.971	2141.97
		32.0977	192.167	2192.17
		32.1478	249.144	2249.14
		32.1979	290.508	2290.51
		32.248	298.559	2298.56
		32.2981	265.983	2265.98
		32.3482	209.994	2209.99
		32.3983	152.38	2152.38
		32.4485	107.207	2107.21
		32.4986	74.9582	2074.96
		32.5487	53.6451	2053.65
		32.5988	39.1579	2039.16
		32.6489	29.8067	2029.81
		32.699	23.3881	2023.39
		32.7491	18.1549	2018.15
		32.7992	14.7763	2014.78
		32.8493	11.8513	2011.85
		32.8994	10.4919	2010.49
		32.9495	8.81773	2008.82
		32.9996	7.83156	2007.83
		33.0497	6.65833	2006.66
		33.0999	5.92305	2005.92
		33.15	5.21685	2005.22
		33.2001	4.65955	2004.66
		33.2502	4.18602	2004.19
		33.3003	3.96033	2003.96
		33.3504	3.35749	2003.36
		33.4005	3.37488	2003.37
		33.4506	3.11928	2003.12
		33.5007	2.9683	2002.97
		33.5508	2.51307	2002.51
		33.6009	2.67548	2002.68
		33.651	2.38781	2002.39
		33.7012	2.53809	2002.54
		33.7513	2.431	2002.43
		33.8014	2.30092	2002.3
		33.8515	2.32754	2002.33
		33.9016	2.40148	2002.4
		33.9517	2.63732	2002.64
		34.0018	2.84496	2002.84
		34.0519	3.04784	2003.05
		34.102	3.34492	2003.34
		34.1521	3.53047	2003.53
		34.2022	3.58885	2003.59
		34.2523	3.63987	2003.64
		34.3025	3.32415	2003.32
		34.3526	2.79273	2002.79
		34.4027	2.34509	2002.35
		34.4528	2.20779	2002.21
		34.5029	1.66729	2001.67
		34.553	1.24442	2001.24
		34.6031	1.53034	2001.53
		34.6532	1.01722	2001.02
		34.7033	0.65819	2000.66
		34.7534	0.59388	2000.59
		34.8035	0.425849	2000.43
		34.8536	0.422327	2000.42
		34.9038	0.210918	2000.21
		34.9539	0.20308	2000.2
		35.004	0.164438	2000.16
		35.0541	0.113221	2000.11
		35.1042	-0.0208823	1999.98
		35.1543	-0.000894022	2000
		35.2044	-0.139314	1999.86
		35.2545	-0.00672428	1999.99
		35.3046	-0.100251	1999.9
		35.3547	0.00926566	2000.01
		35.4048	-0.130771	1999.87
		35.4549	0.029117	2000.03
		35.505	-0.0110694	1999.99
		35.5552	-0.0898721	1999.91
		35.6053	-0.0432012	1999.96
		35.6554	-0.162751	1999.84
		35.7055	0.0327265	2000.03
		35.7556	-0.0708291	1999.93
		35.8057	0.0422073	2000.04
		35.8558	-0.0161851	1999.98
		35.9059	-0.053298	1999.95
		35.956	0.178264	2000.18
		36.0061	0.282669	2000.28
		36.0562	0.121894	2000.12
		36.1063	0.21417	2000.21
		36.1565	0.398038	2000.4
		36.2066	0.217769	2000.22
		36.2567	0.381696	2000.38
		36.3068	0.270027	2000.27
		36.3569	0.148388	2000.15
		36.407	0.157403	2000.16
		36.4571	0.0210317	2000.02
		36.5072	-0.00291472	2000
		36.5573	-0.00558167	1999.99
		36.6074	-0.158844	1999.84
		36.6575	-0.00196125	2000
		36.7076	-0.0659864	1999.93
		36.7578	0.016268	2000.02
		36.8079	-0.0937399	1999.91
		36.858	-0.0263816	1999.97
		36.9081	-0.0835771	1999.92
		36.9582	-0.0835771	1999.92
		37.0083	0.0241714	2000.02
		37.0584	-0.0837797	1999.92
		37.1085	-0.0547606	1999.95
		37.1586	-0.155504	1999.84
		37.2087	0.197324	2000.2
		37.2588	-0.14211	1999.86
		37.3089	-0.0852641	1999.91
		37.359	-0.0735817	1999.93
		37.4092	0.152089	2000.15
		37.4593	0.180288	2000.18
		37.5094	0.0396634	2000.04
		37.5595	0.433339	2000.43
		37.6096	0.25194	2000.25
		37.6597	0.792341	2000.79
		37.7098	0.841	2000.84
		37.7599	1.40573	2001.41
		37.81	1.68705	2001.69
		37.8601	2.02872	2002.03
		37.9102	2.52968	2002.53
		37.9603	3.20818	2003.21
		38.0105	2.76472	2002.76
		38.0606	2.79567	2002.8
		38.1107	2.36613	2002.37
		38.1608	1.78599	2001.79
		38.2109	1.40422	2001.4
		38.261	1.06716	2001.07
		38.3111	0.543051	2000.54
		38.3612	0.261574	2000.26
		38.4113	0.230542	2000.23
		38.4614	0.272874	2000.27
		38.5115	0.154193	2000.15
		38.5616	-0.167167	1999.83
		38.6118	0.0353574	2000.04
		38.6619	-0.0194849	1999.98
		38.712	0.111015	2000.11
		38.7621	0.294044	2000.29
		38.8122	0.217103	2000.22
		38.8623	0.354149	2000.35
		38.9124	0.2781	2000.28
		38.9625	0.574893	2000.57
		39.0126	0.924216	2000.92
		39.0627	1.20107	2001.2
		39.1128	1.50962	2001.51
		39.1629	1.82121	2001.82
		39.2131	2.6567	2002.66
		39.2632	3.60721	2003.61
		39.3133	4.5816	2004.58
		39.3634	6.50957	2006.51
		39.4135	8.64371	2008.64
		39.4636	12.1507	2012.15
		39.5137	16.2519	2016.25
		39.5638	21.8092	2021.81
		39.6139	28.1509	2028.15
		39.664	34.7925	2034.79
		39.7141	39.6532	2039.65
		39.7642	39.7098	2039.71
		39.8143	37.1965	2037.2
		39.8645	30.9883	2030.99
		39.9146	24.2102	2024.21
		39.9647	17.8102	2017.81
		40.0148	12.8768	2012.88
		40.0649	9.44118	2009.44
		40.115	6.79771	2006.8
		40.1651	5.26667	2005.27
		40.2152	3.8767	2003.88
		40.2653	3.00801	2003.01
		40.3154	2.29341	2002.29
		40.3655	1.73551	2001.74
		40.4156	1.22493	2001.22
		40.4658	0.95438	2000.95
		40.5159	0.890005	2000.89
		40.566	0.576075	2000.58
		40.6161	0.4553	2000.46
		40.6662	0.327158	2000.33
		40.7163	0.462484	2000.46
		40.7664	0.251901	2000.25
		40.8165	0.187598	2000.19
		40.8666	0.131554	2000.13
		40.9167	0.0525182	2000.05
		40.9668	0.231741	2000.23
		41.0169	0.244744	2000.24
		41.0671	0.341526	2000.34
		41.1172	0.446566	2000.45
		41.1673	0.317678	2000.32
		41.2174	0.527778	2000.53
		41.2675	0.694053	2000.69
		41.3176	0.819107	2000.82
		41.3677	0.848254	2000.85
		41.4178	0.89868	2000.9
		41.4679	1.03549	2001.04
		41.518	1.09202	2001.09
		41.5681	0.771384	2000.77
		41.6182	0.977241	2000.98
		41.6684	0.576773	2000.58
		41.7185	0.481438	2000.48
		41.7686	0.243321	2000.24
		41.8187	0.284295	2000.28
		41.8688	0.0679032	2000.07
		41.9189	0.0134158	2000.01
		41.969	-0.0119795	1999.99
		42.0191	0.0464046	2000.05
		42.0692	0.00367235	2000
		42.1193	-0.0828845	1999.92
		42.1694	-0.0318916	1999.97
		42.2195	0.0742349	2000.07
		42.2696	-0.0275257	1999.97
		42.3198	-0.0533193	1999.95
		42.3699	0.0437291	2000.04
		42.42	0.0344528	2000.03
		42.4701	-0.0811481	1999.92
		42.5202	-0.0608162	1999.94
		42.5703	-0.0452465	1999.95
		42.6204	0.0619152	2000.06
		42.6705	0.156502	2000.16
		42.7206	0.0744521	2000.07
		42.7707	0.0605564	2000.06
		42.8208	0.200753	2000.2
		42.8709	0.237229	2000.24
		42.9211	0.128317	2000.13
		42.9712	0.295894	2000.3
		43.0213	0.487354	2000.49
		43.0714	0.465719	2000.47
		43.1215	0.345571	2000.35
		43.1716	0.205037	2000.21
		43.2217	0.361823	2000.36
		43.2718	0.310723	2000.31
		43.3219	0.114235	2000.11
		43.372	-0.00889027	1999.99
		43.4221	0.222598	2000.22
		43.4722	-0.0584892	1999.94
		43.5224	-0.0552757	1999.94
		43.5725	0.0186964	2000.02
		43.6226	0.0826981	2000.08
		43.6727	-0.141917	1999.86
		43.7228	-0.0802658	1999.92
		43.7729	0.102035	2000.1
		43.823	-0.0719883	1999.93
		43.8731	-0.102337	1999.9
		43.9232	0.0760946	2000.08
		43.9733	0.0883054	2000.09
		44.0234	-0.044871	1999.96
		44.0735	0.00989868	2000.01
		44.1236	-0.0885313	1999.91
		44.1738	-0.0201222	1999.98
		44.2239	0.191962	2000.19
		44.274	0.032097	2000.03
		44.3241	0.0549695	2000.05
		44.3742	0.140788	2000.14
		44.4243	0.0473657	2000.05
		44.4744	0.0715768	2000.07
		44.5245	0.104046	2000.1
		44.5746	0.123942	2000.12
		44.6247	0.144283	2000.14
		44.6748	0.105174	2000.11
		44.7249	0.209741	2000.21
		44.7751	0.291317	2000.29
		44.8252	0.334276	2000.33
		44.8753	0.362056	2000.36
		44.9254	0.60122	2000.6
		44.9755	0.486664	2000.49
		45.0256	0.734533	2000.73
		45.0757	0.60264	2000.6
		45.1258	0.833172	2000.83
		45.1759	0.965192	2000.97
		45.226	1.06901	2001.07
		45.2761	1.46755	2001.47
		45.3262	1.80403	2001.8
		45.3764	2.18523	2002.19
		45.4265	2.54344	2002.54
		45.4766	2.9021	2002.9
		45.5267	3.40182	2003.4
		45.5768	4.27439	2004.27
		45.6269	5.26199	2005.26
		45.677	6.71097	2006.71
		45.7271	8.48071	2008.48
		45.7772	11.0973	2011.1
		45.8273	14.2715	2014.27
		45.8774	18.7327	2018.73
		45.9275	23.9704	2023.97
		45.9777	31.1017	2031.1
		46.0278	39.9575	2039.96
		46.0779	50.6835	2050.68
		46.128	60.7875	2060.79
		46.1781	69.3686	2069.37
		46.2282	72.8198	2072.82
		46.2783	70.2273	2070.23
		46.3284	61.4451	2061.45
		46.3785	51.8873	2051.89
		46.4286	40.6294	2040.63
		46.4787	31.0335	2031.03
		46.5288	23.4614	2023.46
		46.5789	16.9991	2017
		46.6291	13.2014	2013.2
		46.6792	10.1879	2010.19
		46.7293	8.03431	2008.03
		46.7794	6.3603	2006.36
		46.8295	5.13725	2005.14
		46.8796	4.17246	2004.17
		46.9297	3.59093	2003.59
		46.9798	2.96037	2002.96
		47.0299	2.64535	2002.65
		47.08	2.26047	2002.26
		47.1301	2.19375	2002.19
		47.1802	1.88788	2001.89
		47.2304	1.89236	2001.89
		47.2805	2.02229	2002.02
		47.3306	1.91568	2001.92
		47.3807	2.2965	2002.3
		47.4308	2.43037	2002.43
		47.4809	2.65843	2002.66
		47.531	3.19944	2003.2
		47.5811	3.42059	2003.42
		47.6312	3.53801	2003.54
		47.6813	3.55432	2003.55
		47.7314	3.8393	2003.84
		47.7815	3.73931	2003.74
		47.8317	3.16321	2003.16
		47.8818	2.86359	2002.86
		47.9319	2.77536	2002.78
		47.982	1.94018	2001.94
		48.0321	1.87367	2001.87
		48.0822	1.2998	2001.3
		48.1323	0.926889	2000.93
		48.1824	0.905992	2000.91
		48.2325	0.692832	2000.69
		48.2826	0.566056	2000.57
		48.3327	0.569934	2000.57
		48.3828	0.324258	2000.32
		48.433	0.141529	2000.14
		48.4831	0.217058	2000.22
		48.5332	0.0873046	2000.09
		48.5833	0.114247	2000.11
		48.6334	0.159865	2000.16
		48.6835	0.109575	2000.11
		48.7336	-0.224124	1999.78
		48.7837	-0.0808131	1999.92
		48.8338	0.0319399	2000.03
		48.8839	-0.0475693	1999.95
		48.934	-0.0797573	1999.92
		48.9841	-0.0626061	1999.94
		49.0342	-0.000737982	2000
		49.0844	0.0147013	2000.01
		49.1345	-0.0735799	1999.93
		49.1846	-0.0780816	1999.92
		49.2347	0.0379026	2000.04
		49.2848	0.00849964	2000.01
		49.3349	-0.0386863	1999.96
		49.385	-0.0229261	1999.98
		49.4351	-0.0770323	1999.92
		49.4852	-0.0516647	1999.95
		49.5353	0.0887324	2000.09
		49.5854	0.0733257	2000.07
		49.6355	-0.00934315	1999.99
		49.6857	-0.0030242	2000
		49.7358	-0.0769883	1999.92
		49.7859	-0.0770323	1999.92
		49.836	0.0034298	2000
		49.8861	-0.0771203	1999.92
		49.9362	-0.0481257	1999.95
		49.9863	-0.0551433	1999.94
		50.0364	-0.0773398	1999.92
		50.0865	0.0349676	2000.03
		50.1366	-0.042383	1999.96
		50.1867	-0.0411624	1999.96
		50.2368	0.0933169	2000.09
		50.287	0.0693881	2000.07
		50.3371	-0.0218028	1999.98
		50.3872	0.140057	2000.14
		50.4373	0.221633	2000.22
		50.4874	0.228135	2000.23
		50.5375	0.362687	2000.36
		50.5876	0.429977	2000.43
		50.6377	0.453442	2000.45
		50.6878	0.36277	2000.36
		50.7379	0.251711	2000.25
		50.788	0.344223	2000.34
		50.8381	0.31739	2000.32
		50.8883	0.31444	2000.31
		50.9384	0.153082	2000.15
		50.9885	0.0468579	2000.05
		51.0386	0.06608	2000.07
		51.0887	0.0284565	2000.03
		51.1388	0.0277376	2000.03
		51.1889	-0.00638935	1999.99
		51.239	0.071909	2000.07
		51.2891	0.0881536	2000.09
		51.3392	0.485053	2000.49
		51.3893	0.416252	2000.42
		51.4394	0.704668	2000.7
		51.4895	1.06645	2001.07
		51.5397	1.03544	2001.04
		51.5898	1.44239	2001.44
		51.6399	2.16488	2002.16
		51.69	2.58313	2002.58
		51.7401	3.50964	2003.51
		51.7902	4.84805	2004.85
		51.8403	5.97337	2005.97
		51.8904	7.53924	2007.54
		51.9405	9.13681	2009.14
		51.9906	10.4405	2010.44
		52.0407	11.0416	2011.04
		52.0908	11.0129	2011.01
		52.141	10.4768	2010.48
		52.1911	8.8657	2008.87
		52.2412	7.60657	2007.61
		52.2913	6.20466	2006.2
		52.3414	4.79798	2004.8
		52.3915	3.70425	2003.7
		52.4416	2.53023	2002.53
		52.4917	2.17177	2002.17
		52.5418	1.44656	2001.45
		52.5919	0.974408	2000.97
		52.642	1.19801	2001.2
		52.6921	0.65904	2000.66
		52.7423	0.625723	2000.63
		52.7924	0.697019	2000.7
		52.8425	0.615116	2000.62
		52.8926	0.736784	2000.74
		52.9427	0.817231	2000.82
		52.9928	0.869478	2000.87
		53.0429	1.29457	2001.29
		53.093	1.45187	2001.45
		53.1431	1.77629	2001.78
		53.1932	2.65845	2002.66
		53.2433	2.79887	2002.8
		53.2934	2.97358	2002.97
		53.3435	3.77114	2003.77
		53.3937	3.91029	2003.91
		53.4438	3.58374	2003.58
		53.4939	3.70816	2003.71
		53.544	3.40854	2003.41
		53.5941	3.01823	2003.02
		53.6442	2.51378	2002.51
		53.6943	2.10092	2002.1
		53.7444	1.84475	2001.84
		53.7945	1.1307	2001.13
		53.8446	0.950949	2000.95
		53.8947	0.599769	2000.6
		53.9448	0.68914	2000.69
		53.995	0.221665	2000.22
		54.0451	0.244219	2000.24
		54.0952	0.0849282	2000.08
		54.1453	-0.0114167	1999.99
		54.1954	0.150497	2000.15
		54.2455	0.130565	2000.13
		54.2956	0.0616007	2000.06
		54.3457	0.0113114	2000.01
		54.3958	-0.0828027	1999.92
		54.4459	-0.0673928	1999.93
		54.496	0.104713	2000.1
		54.5461	-0.131589	1999.87
		54.5963	-0.0262988	1999.97
		54.6464	-0.144521	1999.86
		54.6965	0.00350341	2000
		54.7466	-0.0277136	1999.97
		54.7967	-0.128797	1999.87
		54.8468	0.137753	2000.14
		54.8969	-0.0405626	1999.96
		54.947	-0.0387449	1999.96
		54.9971	0.0208106	2000.02
		55.0472	0.0313331	2000.03
		55.0973	-0.0201982	1999.98
		55.1474	-0.0843042	1999.92
		55.1976	-0.0319495	1999.97
		55.2477	0.0599139	2000.06
		55.2978	-0.0456932	1999.95
		55.3479	0.000187526	2000
		55.398	0.101202	2000.1
		55.4481	-0.0134833	1999.99
		55.4982	-0.0860558	1999.91
		55.5483	0.00205733	2000
		55.5984	0.0411374	2000.04
		55.6485	0.0207679	2000.02
		55.6986	0.086782	2000.09
		55.7487	0.0464714	2000.05
		55.7988	0.0717112	2000.07
		55.849	0.175522	2000.18
		55.8991	0.38655	2000.39
		55.9492	0.381878	2000.38
		55.9993	0.536507	2000.54
		56.0494	0.47804	2000.48
		56.0995	0.498144	2000.5
		56.1496	0.914528	2000.91
		56.1997	0.966775	2000.97
		56.2498	1.15228	2001.15
		56.2999	1.08563	2001.09
		56.35	1.46213	2001.46
		56.4001	1.80522	2001.81
		56.4503	1.96126	2001.96
		56.5004	2.41462	2002.41
		56.5505	2.68354	2002.68
		56.6006	3.24716	2003.25
		56.6507	3.87895	2003.88
		56.7008	4.3419	2004.34
		56.7509	5.43812	2005.44
		56.801	7.00874	2007.01
		56.8511	8.14752	2008.15
		56.9012	10.1696	2010.17
		56.9513	12.5748	2012.57
		57.0014	15.5301	2015.53
		57.0516	19.8034	2019.8
		57.1017	24.4132	2024.41
		57.1518	30.5599	2030.56
		57.2019	38.6575	2038.66
		57.252	47.4014	2047.4
		57.3021	56.4088	2056.41
		57.3522	65.8176	2065.82
		57.4023	73.0186	2073.02
		57.4524	77.47	2077.47
		57.5025	76.1302	2076.13
		57.5526	71.1398	2071.14
		57.6027	63.9962	2064
		57.6529	55.3244	2055.32
		57.703	45.713	2045.71
		57.7531	36.5707	2036.57
		57.8032	28.9706	2028.97
		57.8533	22.2355	2022.24
		57.9034	17.993	2017.99
		57.9535	13.9541	2013.95
		58.0036	10.9026	2010.9
		58.0537	8.78126	2008.78
		58.1038	7.08223	2007.08
		58.1539	5.9149	2005.91
		58.204	5.10218	2005.1
		58.2541	4.27428	2004.27
		58.3043	3.69944	2003.7
		58.3544	3.05993	2003.06
		58.4045	2.61358	2002.61
		58.4546	2.44372	2002.44
		58.5047	2.15711	2002.16
		58.5548	2.01679	2002.02
		58.6049	1.88732	2001.89
		58.655	1.46924	2001.47
		58.7051	1.37974	2001.38
		58.7552	1.41567	2001.42
		58.8053	1.15258	2001.15
		58.8554	1.12431	2001.12
		58.9056	1.05221	2001.05
		58.9557	0.64462	2000.64
		59.0058	0.677581	2000.68
		59.0559	0.794321	2000.79
		59.106	0.48182	2000.48
		59.1561	0.414557	2000.41
		59.2062	0.371178	2000.37
		59.2563	0.195432	2000.2
		59.3064	0.327424	2000.33
		59.3565	0.308821	2000.31
		59.4066	0.110976	2000.11
		59.4567	-0.023922	1999.98
		59.5069	0.049959	2000.05
		59.557	0.0930362	2000.09
		59.6071	-0.0379197	1999.96
		59.6572	-0.108534	1999.89
		59.7073	0.11557	2000.12
		59.7574	-0.0452977	1999.95
		59.8075	-0.132802	1999.87
		59.8576	0.0402032	2000.04
		59.9077	-0.0597828	1999.94
		59.9578	-0.0942185	1999.91
		60.0079	0.0671045	2000.07
		60.058	-0.0237304	1999.98
		60.1081	-0.132348	1999.87
		60.1583	0.0615631	2000.06
		60.2084	0.0241499	2000.02
		60.2585	0.0600996	2000.06
		60.3086	-0.10663	1999.89
		60.3587	0.0656291	2000.07
		60.4088	0.131563	2000.13
		60.4589	-0.208307	1999.79
		60.509	0.0694571	2000.07
		60.5591	-0.102854	1999.9
		60.6092	-0.074085	1999.93
		60.6593	0.0801299	2000.08
		60.7094	-0.00218818	2000
		60.7596	-0.00853927	1999.99
		60.8097	-0.0769442	1999.92
		60.8598	-0.0647699	1999.94
		60.9099	0.0416006	2000.04
		60.96	0.166646	2000.17
		61.0101	0.172347	2000.17
		61.0602	0.152452	2000.15
		61.1103	0.114773	2000.11
		61.1604	0.197333	2000.2
		61.2105	0.366276	2000.37
		61.2606	0.342957	2000.34
		61.3107	0.387793	2000.39
		61.3609	0.214325	2000.21
		61.411	0.249636	2000.25
		61.4611	0.155185	2000.16
		61.5112	0.0924307	2000.09
		61.5613	0.201997	2000.2
		61.6114	0.116697	2000.12
		61.6615	0.0995519	2000.1
		61.7116	0.0906652	2000.09
		61.7617	-0.00892112	1999.99
		61.8118	-0.105457	1999.89
		61.8619	-0.00170407	2000
		61.912	0.099891	2000.1
		61.9622	-0.0558802	1999.94
		62.0123	-0.0237053	1999.98
		62.0624	-0.0744176	1999.93
		62.1125	0.0289622	2000.03
		62.1626	0.0338298	2000.03
		62.2127	-0.0285648	1999.97
		62.2628	0.00584094	2000.01
		62.3129	0.0641304	2000.06
		62.363	0.117658	2000.12
		62.4131	-0.0601398	1999.94
		62.4632	-0.0447828	1999.96
		62.5133	0.0491455	2000.05
		62.5634	0.0575824	2000.06
		62.6136	-0.0715554	1999.93
		62.6637	-0.0795557	1999.92
		62.7138	0.0821609	2000.08
		62.7639	0.00474038	2000
		62.814	-0.0592131	1999.94
		62.8641	0.0517587	2000.05
		62.9142	0.189218	2000.19
		62.9643	0.0458741	2000.05
		63.0144	0.108705	2000.11
		63.0645	0.0756284	2000.08
		63.1146	0.321643	2000.32
		63.1647	0.224355	2000.22
		63.2149	0.390533	2000.39
		63.265	0.34622	2000.35
		63.3151	0.440374	2000.44
		63.3652	0.550599	2000.55
		63.4153	0.783666	2000.78
		63.4654	0.894784	2000.89
		63.5155	0.88916	2000.89
		63.5656	1.24075	2001.24
		63.6157	1.43394	2001.43
		63.6658	1.59632	2001.6
		63.7159	1.44925	2001.45
		63.766	1.43805	2001.44
		63.8162	1.55489	2001.55
		63.8663	1.42999	2001.43
		63.9164	1.26908	2001.27
		63.9665	1.29352	2001.29
		64.0166	1.01111	2001.01
		64.0667	1.05726	2001.06
		64.1168	0.931995	2000.93
		64.1669	0.869671	2000.87
		64.217	0.440606	2000.44
		64.2671	0.485946	2000.49
		64.3172	0.219231	2000.22
		64.3673	0.377442	2000.38
		64.4175	0.247037	2000.25
		64.4676	-0.000110041	2000
		64.5177	0.10996	2000.11
		64.5678	0.05381	2000.05
		64.6179	0.0293559	2000.03
		64.668	-0.072777	1999.93
		64.7181	-0.129909	1999.87
		64.7682	0.105072	2000.11
		64.8183	0.0227914	2000.02
		64.8684	0.0503316	2000.05
		64.9185	-0.0492863	1999.95
		64.9686	0.0130003	2000.01
		65.0187	-0.00239185	2000
		65.0689	-0.134525	1999.87
		65.119	0.00722475	2000.01
		65.1691	-0.105787	1999.89
		65.2192	0.00820936	2000.01
		65.2693	0.12786	2000.13
		65.3194	0.0552495	2000.06
		65.3695	-0.0898321	1999.91
		65.4196	-0.0720114	1999.93
		65.4697	0.0139638	2000.01
		65.5198	0.100385	2000.1
		65.5699	-0.0236848	1999.98
		65.62	-0.0483503	1999.95
		65.6702	0.015972	2000.02
		65.7203	-0.0781136	1999.92
		65.7704	-0.0179306	1999.98
		65.8205	0.0739485	2000.07
		65.8706	-0.0134136	1999.99
		65.9207	0.0871704	2000.09
		65.9708	0.133513	2000.13
		66.0209	0.0605102	2000.06
		66.071	0.198891	2000.2
		66.1211	0.191885	2000.19
		66.1712	0.266054	2000.27
		66.2213	0.22869	2000.23
		66.2715	0.418334	2000.42
		66.3216	0.483425	2000.48
		66.3717	0.671358	2000.67
		66.4218	0.72432	2000.72
		66.4719	1.06679	2001.07
		66.522	1.26127	2001.26
		66.5721	1.11765	2001.12
		66.6222	1.44063	2001.44
		66.6723	1.82135	2001.82
		66.7224	2.47855	2002.48
		66.7725	2.86276	2002.86
		66.8226	3.60158	2003.6
		66.8727	4.182	2004.18
		66.9229	5.34098	2005.34
		66.973	6.54729	2006.55
		67.0231	7.7879	2007.79
		67.0732	10.0237	2010.02
		67.1233	12.0152	2012.02
		67.1734	14.5905	2014.59
		67.2235	17.0412	2017.04
		67.2736	20.1148	2020.11
		67.3237	21.931	2021.93
		67.3738	23.6513	2023.65
		67.4239	24.5569	2024.56
		67.474	24.7052	2024.71
		67.5242	23.3513	2023.35
		67.5743	21.5552	2021.56
		67.6244	18.9287	2018.93
		67.6745	16.8653	2016.87
		67.7246	13.8283	2013.83
		67.7747	11.7448	2011.74
		67.8248	9.29205	2009.29
		67.8749	7.56108	2007.56
		67.925	6.32795	2006.33
		67.9751	5.14995	2005.15
		68.0252	4.08698	2004.09
		68.0753	3.70415	2003.7
		68.1255	2.85301	2002.85
		68.1756	2.47367	2002.47
		68.2257	2.07134	2002.07
		68.2758	2.02102	2002.02
		68.3259	1.98416	2001.98
		68.376	1.69515	2001.7
		68.4261	1.67221	2001.67
		68.4762	1.70961	2001.71
		68.5263	1.63548	2001.64
		68.5764	1.55658	2001.56
		68.6265	1.5797	2001.58
		68.6766	1.3767	2001.38
		68.7268	1.2106	2001.21
		68.7769	1.09703	2001.1
		68.827	0.994326	2000.99
		68.8771	0.910297	2000.91
		68.9272	0.730359	2000.73
		68.9773	0.485763	2000.49
		69.0274	0.436926	2000.44
		69.0775	0.458848	2000.46
		69.1276	0.197361	2000.2
		69.1777	0.254029	2000.25
		69.2278	0.0897894	2000.09
		69.2779	-0.0661919	1999.93
		69.328	0.0178564	2000.02
		69.3782	0.175267	2000.18
		69.4283	0.057083	2000.06
		69.4784	-0.0762803	1999.92
		69.5285	-0.0667095	1999.93
		69.5786	-0.0540883	1999.95
		69.6287	-0.009771	1999.99
		69.6788	-0.00927834	1999.99
		69.7289	-0.0708395	1999.93
		69.779	-0.0746629	1999.93
		69.8291	0.0381864	2000.04
		69.8792	0.00564855	2000.01
		69.9293	0.0647027	2000.06
		69.9795	-0.00600537	1999.99
		70.0296	-0.0189756	1999.98
		70.0797	0.0492295	2000.05
		70.1298	-0.067015	1999.93
		70.1799	-0.0526051	1999.95
		70.23	-0.105457	1999.89
		70.2801	0.0315088	2000.03
		70.3302	0.0256918	2000.03
		70.3803	0.10105	2000.1
		70.4304	-0.0471036	1999.95
		70.4805	0.0265429	2000.03
		70.5306	-0.11551	1999.88
		70.5808	0.0189244	2000.02
		70.6309	-0.0493197	1999.95
		70.681	0.151111	2000.15
		70.7311	0.268656	2000.27
		70.7812	0.2955	2000.3
		70.8313	0.239457	2000.24
		70.8814	0.360944	2000.36
		70.9315	0.420377	2000.42
		70.9816	0.383901	2000.38
		71.0317	0.545789	2000.55
		71.0818	0.40604	2000.41
		71.1319	0.347465	2000.35
		71.1821	0.440379	2000.44
		71.2322	0.463426	2000.46
		71.2823	0.255149	2000.26
		71.3324	0.305131	2000.31
		71.3825	0.186287	2000.19
		71.4326	0.424661	2000.42
		71.4827	0.410877	2000.41
		71.5328	0.433997	2000.43
		71.5829	0.723188	2000.72
		71.633	1.00501	2001.01
		71.6831	1.1102	2001.11
		71.7332	1.29917	2001.3
		71.7833	1.67608	2001.68
		71.8335	2.04563	2002.05
		71.8836	2.42343	2002.42
		71.9337	2.96575	2002.97
		71.9838	3.54757	2003.55
		72.0339	3.6637	2003.66
		72.084	4.14745	2004.15
		72.1341	4.13947	2004.14
		72.1842	4.15276	2004.15
		72.2343	3.83578	2003.84
		72.2844	3.71715	2003.72
		72.3345	3.4271	2003.43
		72.3846	2.8302	2002.83
		72.4348	2.22593	2002.23
		72.4849	1.96066	2001.96
		72.535	1.59687	2001.6
		72.5851	1.24915	2001.25
		72.6352	1.06333	2001.06
		72.6853	0.883173	2000.88
		72.7354	0.617522	2000.62
		72.7855	0.808046	2000.81
		72.8356	0.624017	2000.62
		72.8857	0.505537	2000.51
		72.9358	0.676567	2000.68
		72.9859	0.460022	2000.46
		73.0361	0.559027	2000.56
		73.0862	0.533478	2000.53
		73.1363	0.57348	2000.57
		73.1864	0.561844	2000.56
		73.2365	0.667842	2000.67
		73.2866	0.633662	2000.63
		73.3367	0.542635	2000.54
		73.3868	0.358305	2000.36
		73.4369	0.546817	2000.55
		73.487	0.415463	2000.42
		73.5371	0.373096	2000.37
		73.5872	0.211384	2000.21
		73.6374	0.214181	2000.21
		73.6875	0.154924	2000.15
		73.7376	0.0700709	2000.07
		73.7877	0.0038935	2000
		73.8378	0.0136831	2000.01
		73.8879	-0.0463936	1999.95
		73.938	-0.0383159	1999.96
		73.9881	-0.0245836	1999.98
		74.0382	-0.11978	1999.88
		74.0883	0.0204364	2000.02
		74.1384	-0.0498383	1999.95
		74.1885	0.0574164	2000.06
		74.2386	-0.027591	1999.97
		74.2888	0.106598	2000.11
		74.3389	0.0511285	2000.05
		74.389	-0.0794154	1999.92
		74.4391	-0.0671423	1999.93
		74.4892	0.107035	2000.11
		74.5393	-0.0412577	1999.96
		74.5894	-0.0042087	2000
		74.6395	0.0437032	2000.04
		74.6896	-0.00168879	2000
		74.7397	-0.0544471	1999.95
		74.7898	-0.135405	1999.86
		74.8399	0.0399861	2000.04
		74.8901	0.054365	2000.05
		74.9402	-0.00372653	2000
		74.9903	0.0844614	2000.08
		75.0404	0.0194497	2000.02
		75.0905	0.0720717	2000.07
		75.1406	0.0183689	2000.02
		75.1907	0.121362	2000.12
		75.2408	0.23001	2000.23
		75.2909	0.0995211	2000.1
		75.341	0.279374	2000.28
		75.3911	0.272173	2000.27
		75.4412	0.327918	2000.33
		75.4914	0.391922	2000.39
		75.5415	0.401684	2000.4
		75.5916	0.687934	2000.69
		75.6417	0.659527	2000.66
		75.6918	0.769586	2000.77
		75.7419	0.934779	2000.93
		75.792	1.37125	2001.37
		75.8421	1.52952	2001.53
		75.8922	1.63095	2001.63
		75.9423	2.11303	2002.11
		75.9924	2.6815	2002.68
		76.0425	3.00301	2003
		76.0926	3.43956	2003.44
		76.1428	4.18384	2004.18
		76.1929	5.24107	2005.24
		76.243	6.25448	2006.25
		76.2931	7.19281	2007.19
		76.3432	8.68627	2008.69
		76.3933	10.1854	2010.19
		76.4434	11.8464	2011.85
		76.4935	13.5574	2013.56
		76.5436	15.5995	2015.6
		76.5937	17.2098	2017.21
		76.6438	18.6304	2018.63
		76.6939	19.2207	2019.22
		76.7441	19.3974	2019.4
		76.7942	19.1059	2019.11
		76.8443	17.8486	2017.85
		76.8944	16.7532	2016.75
		76.9445	15.3952	2015.4
		76.9946	13.7669	2013.77
		77.0447	12.1911	2012.19
		77.0948	10.1704	2010.17
		77.1449	9.10851	2009.11
		77.195	7.70331	2007.7
		77.2451	6.68658	2006.69
		77.2952	5.50622	2005.51
		77.3454	5.04247	2005.04
		77.3955	4.50103	2004.5
		77.4456	3.85847	2003.86
		77.4957	3.66168	2003.66
		77.5458	3.22835	2003.23
		77.5959	3.10797	2003.11
		77.646	3.31876	2003.32
		77.6961	2.99354	2002.99
		77.7462	2.91616	2002.92
		77.7963	3.02673	2003.03
		77.8464	2.7315	2002.73
		77.8965	2.55911	2002.56
		77.9467	2.4158	2002.42
		77.9968	2.26774	2002.27
		78.0469	2.11492	2002.11
		78.097	1.86098	2001.86
		78.1471	1.53977	2001.54
		78.1972	1.28672	2001.29
		78.2473	1.15131	2001.15
		78.2974	1.02936	2001.03
		78.3475	0.704731	2000.7
		78.3976	0.539404	2000.54
		78.4477	0.455252	2000.46
		78.4978	0.303839	2000.3
		78.5479	0.168496	2000.17
		78.5981	0.189849	2000.19
		78.6482	0.112691	2000.11
		78.6983	-0.016105	1999.98
		78.7484	0.191483	2000.19
		78.7985	-0.0405873	1999.96
		78.8486	0.0298721	2000.03
		78.8987	0.0200484	2000.02
		78.9488	0.0914001	2000.09
		78.9989	0.13976	2000.14
		79.049	-0.0275789	1999.97
		79.0991	-0.0278054	1999.97
		79.1492	-0.0536274	1999.95
		79.1994	-0.0737949	1999.93
		79.2495	-0.0635718	1999.94
		79.2996	0.103348	2000.1
		79.3497	-0.0209537	1999.98
		79.3998	0.037483	2000.04
		79.4499	-0.106759	1999.89
		79.5	-0.0550197	1999.94
		79.5501	0.0179994	2000.02
		79.6002	-0.00228533	2000
		79.6503	-0.0950406	1999.9
		79.7004	0.00015945	2000
		79.7505	-0.039611	1999.96
		79.8007	0.00960636	2000.01
		79.8508	-0.000625935	2000
		79.9009	0.0911504	2000.09
		79.951	0.0713938	2000.07
		80.0011	0	2000
