# Supplementary material for: The methanol electrooxidation activity and the CO-resilient surface of a La x Fe 1− y − z Cu y Pd z O 3 perovskite
Source: Royal Society of Chemistry journal article supplement (doi:10.1039/d5ta04846j), 2026-01-01
Supplement: d5ta04846j3.xlsx [file d5ta04846j3.xlsx]

## Sheet: Feuil1
		T	TCD SIGNAL
		30.91491	1
		30.93689	0.99997
		31.07096	1
		31.40468	1
		31.94023	1.00006
		32.69081	1.0001
		33.62968	1.00003
		34.70922	1.0001
		35.89389	1.0001
		37.18002	1
		38.47202	1.0001
		39.76768	1.00008
		41.07067	1.00008
		42.37109	1.0001
		43.62683	1.00007
		44.86864	1.00006
		46.0566	1.0001
		47.23358	1.0001
		48.36	1.00012
		49.48313	1.00005
		50.57378	1.00003
		51.63115	1.00013
		52.68636	1.00011
		53.72475	1.00016
		54.78785	1.00013
		55.81622	1.00015
		56.86284	1.00008
		57.87403	1.00017
		58.8888	1.00008
		59.90285	1.00005
		60.93015	1.0001
		61.94957	1.00005
		62.96398	1.00007
		63.96587	1.00004
		64.97562	1.00006
		65.96712	1.00003
		66.96579	1
		67.97054	1.00007
		68.95882	1.00008
		69.95247	1.00005
		70.94075	1.00011
		71.93797	1.0001
		72.9395	1.00014
		73.92134	1.0001
		74.89172	1.00018
		75.87213	1.00014
		76.85862	1.00011
		77.82435	1.00017
		78.82122	1.00015
		79.7934	1.00018
		80.77846	1.0002
		81.73488	1.00018
		82.72101	1.00024
		83.68531	1.00025
		84.64639	1.00019
		85.62	1.0002
		86.5936	1.00017
		87.58797	1.00012
		88.57159	1.00017
		89.52301	1.00022
		90.49017	1.00019
		91.46592	1.00015
		92.43022	1.00018
		93.39308	1.0002
		94.37421	1.00023
		95.35569	1.00026
		96.33896	1.00026
		97.32509	1.00031
		98.27722	1.00028
		99.25404	1.00032
		100.22174	1.00032
		101.24101	1.00041
		102.25992	1.00034
		103.2392	1.00042
		104.23267	1.00046
		105.21014	1.00037
		106.19124	1.00047
		107.15489	1.00044
		108.11673	1.00044
		109.07967	1.0005
		110.04659	1.00042
		111.02115	1.00049
		111.98444	1.00053
		112.94773	1.00064
		113.91212	1.00066
		114.90121	1.00071
		115.88559	1.00072
		116.83907	1.00097
		117.79582	1.0011
		118.76747	1.00127
		119.73258	1.0015
		120.67842	1.00184
		121.65771	1.00222
		122.63373	1.00255
		123.60974	1.00274
		124.57957	1.00298
		125.54868	1.00309
		126.52179	1.0032
		127.49817	1.00349
		128.47273	1.00355
		129.41675	1.00384
		130.38187	1.00426
		131.34334	1.00482
		132.31754	1.00535
		133.2921	1.00604
		134.25575	1.00701
		135.23685	1.00799
		136.18524	1.00929
		137.15836	1.01084
		138.13327	1.01251
		139.10565	1.01441
		140.08385	1.01631
		141.06096	1.0181
		142.00098	1.01973
		142.96063	1.02096
		143.94937	1.02181
		144.95447	1.02204
		145.93558	1.02188
		146.92432	1.02116
		147.88434	1.01991
		148.86035	1.01861
		149.8011	1.01698
		150.75713	1.01549
		151.69498	1.0139
		152.65135	1.01242
		153.59575	1.01106
		154.55612	1.0099
		155.49834	1.009
		156.4718	1.00806
		157.46635	1.00729
		158.41547	1.0066
		159.36823	1.00612
		160.31578	1.00565
		161.28902	1.00515
		162.29182	1.00489
		163.26729	1.00462
		164.22388	1.00438
		165.17197	1.00413
		166.09195	1.00401
		167.0356	1.00383
		167.98813	1.00373
		168.9536	1.00361
		169.92387	1.00347
		170.88454	1.00343
		171.84778	1.00346
		172.82657	1.00334
		173.82272	1.00326
		174.82628	1.00329
		175.79988	1.00326
		176.76535	1.00329
		177.73082	1.00331
		178.69592	1.00329
		179.65176	1.00325
		180.60762	1.0033
		181.58086	1.00325
		182.53116	1.00338
		183.50034	1.0034
		184.47319	1.00334
		185.44827	1.00334
		186.39932	1.00323
		187.35814	1.00327
		188.33655	1.00328
		189.32642	1.00327
		190.32072	1.00311
		191.30728	1.00313
		192.27422	1.00312
		193.25745	1.00314
		194.25027	1.00307
		195.2283	1.00311
		196.19341	1.00311
		197.13484	1.00306
		198.09512	1.00299
		199.05061	1.00299
		200.02718	1.00301
		201.02185	1.00288
		202.01135	1.00296
		203.01085	1.00295
		204.0011	1.00293
		204.96803	1.00287
		205.9361	1.00283
		206.92744	1.00288
		207.87369	1.00284
		208.8336	1.00278
		209.77171	1.00284
		210.75012	1.00278
		211.74258	1.00276
		212.71138	1.00271
		213.66576	1.00265
		214.60312	1.00274
		215.54086	1.00274
		216.49338	1.00274
		217.47031	1.0027
		218.48866	1.00267
		219.48334	1.00269
		220.48135	1.00266
		221.45309	1.00274
		222.44556	1.00273
		223.44025	1.00272
		224.43344	1.00261
		225.47139	1.00266
		226.48862	1.0028
		227.49625	1.00278
		228.51349	1.00259
		229.56326	1.00281
		230.61488	1.00283
		231.62213	1.00277
		232.6268	1.00268
		233.6407	1.00283
		234.65277	1.0027
		235.65373	1.00285
		236.67615	1.00286
		237.70299	1.00285
		238.74611	1.0029
		239.79773	1.00281
		240.82205	1.00286
		241.84618	1.00273
		242.84402	1.00294
		243.84763	1.00296
		244.86815	1.00297
		245.875	1.00293
		246.90454	1.00283
		247.91426	1.0029
		248.9384	1.00297
		249.96542	1.00304
		251.00397	1.00306
		252.02846	1.00307
		253.0544	1.00308
		254.11023	1.00309
		255.16066	1.0031
		256.19922	1.00307
		257.23956	1.00311
		258.29214	1.00304
		259.33032	1.00308
		260.38797	1.00312
		261.41174	1.00309
		262.42688	1.00315
		263.46866	1.00318
		264.49243	1.00302
		265.52774	1.00305
		266.58032	1.00316
		267.60806	1.00315
		268.62067	1.00308
		269.6405	1.00294
		270.66281	1.00304
		271.68875	1.00302
		272.71973	1.00292
		273.77484	1.0031
		274.81015	1.00299
		275.84869	1.00305
		276.88077	1.00293
		277.94489	1.00297
		279.00037	1.00301
		280.02484	1.00299
		281.08069	1.00297
		282.09546	1.00295
		283.12753	1.00288
		284.15958	1.00284
		285.18011	1.00291
		286.23486	1.00291
		287.27484	1.00293
		288.30368	1.00287
		289.33609	1.00285
		290.39014	1.00277
		291.43192	1.00282
		292.49207	1.00272
		293.5162	1.00274
		294.54358	1.00275
		295.54395	1.00273
		296.56555	1.00276
		297.59259	1.00273
		298.63867	1.00275
		299.68011	1.0027
		300.70786	1.00272
		301.71326	1.00265
		302.76117	1.00268
		303.79611	1.00264
		304.83932	1.00265
		305.91751	1.00265
		306.95856	1.00264
		307.97549	1.00265
		309.0072	1.00259
		310.04898	1.0026
		311.07599	1.0026
		312.10049	1.0026
		313.134	1.00264
		314.17398	1.00261
		315.19525	1.00262
		316.23846	1.00264
		317.27197	1.00262
		318.32312	1.00261
		319.36816	1.00265
		320.37979	1.00263
		321.3902	1.00261
		322.40872	1.0027
		323.42758	1.0026
		324.45175	1.00269
		325.4996	1.00255
		326.53192	1.00252
		327.55997	1.00266
		328.60782	1.00276
		329.62918	1.00255
		330.6788	1.00267
		331.72629	1.00277
		332.77731	1.00277
		333.80502	1.00277
		334.8345	1.00278
		335.84949	1.00286
		336.85284	1.00289
		337.86359	1.00278
		338.87576	1.00299
		339.9003	1.0028
		340.94318	1.00283
		341.97266	1.00296
		343.00638	1.00283
		344.04364	1.00293
		345.05862	1.0028
		346.10187	1.00287
		347.12006	1.00296
		348.14175	1.003
		349.16205	1.00299
		350.17102	1.00301
		351.17862	1.00317
		352.1936	1.00324
		353.19022	1.0032
		354.20874	1.00322
		355.21667	1.00319
		356.2207	1.00328
		357.23749	1.00328
		358.26837	1.00323
		359.2883	1.0033
		360.30365	1.00331
		361.32358	1.00327
		362.33328	1.00328
		363.36206	1.00343
		364.36185	1.00353
		365.37439	1.00338
		366.37842	1.00353
		367.40189	1.00357
		368.41406	1.00348
		369.44177	1.00349
		370.46631	1.00369
		371.46786	1.00367
		372.46732	1.00351
		373.46854	1.00356
		374.46692	1.00366
		375.48508	1.00364
		376.51031	1.00368
		377.51578	1.00361
		378.53113	1.00362
		379.55283	1.00363
		380.55582	1.00366
		381.56973	1.00369
		382.57874	1.00382
		383.59372	1.0038
		384.59351	1.00381
		385.5845	1.00394
		386.58997	1.00379
		387.61517	1.00383
		388.60544	1.00398
		389.62079	1.00397
		390.6485	1.00393
		391.6543	1.00396
		392.6647	1.00408
		393.67087	1.00397
		394.68445	1.00403
		395.69519	1.00409
		396.72046	1.00409
		397.72272	1.00405
		398.7384	1.00411
		399.73999	1.00411
		400.73828	1.00407
		401.71387	1.0041
		402.70929	1.00406
		403.73328	1.00402
		404.75311	1.00406
		405.75446	1.00406
		406.77078	1.00401
		407.76413	1.00405
		408.78394	1.00411
		409.80655	1.00415
		410.82043	1.00414
		411.82281	1.00415
		412.82767	1.00414
		413.84436	1.00417
		414.8349	1.00413
		415.83276	1.00416
		416.83865	1.00415
		417.84662	1.00414
		418.86572	1.00414
		419.87369	1.00419
		420.87924	1.00417
		421.88998	1.00416
		422.89551	1.00418
		423.89722	1.00414
		424.89545	1.00415
		425.89957	1.00416
		426.88107	1.00408
		427.87961	1.00407
		428.92313	1.00404
		429.90948	1.00402
		430.89273	1.00402
		431.88885	1.00399
		432.88602	1.00401
		433.89331	1.00404
		434.89639	1.00401
		435.89914	1.00402
		436.91269	1.0041
		437.91821	1.00406
		438.93036	1.00403
		439.94077	1.00406
		440.95117	1.00399
		441.95392	1.00399
		442.94482	1.00392
		443.93259	1.00391
		444.93848	1.00394
		445.91821	1.00389
		446.9227	1.00396
		447.9129	1.00392
		448.91876	1.0039
		449.9494	1.00381
		450.94901	1.00381
		451.94165	1.0038
		452.94751	1.00378
		453.94537	1.00378
		454.93732	1.00377
		455.9418	1.00374
		456.93134	1.00377
		457.92151	1.00374
		458.93228	1.00368
		459.93329	1.00373
		460.92279	1.00368
		461.93179	1.00365
		462.9314	1.00367
		463.92508	1.00371
		464.92468	1.00367
		465.93823	1.00365
		466.93332	1.00369
		467.94128	1.00364
		468.96075	1.00363
		469.95898	1.00361
		470.96484	1.0036
		471.96167	1.00356
		472.95361	1.0036
		473.96716	1.00355
		474.96225	1.00358
		475.96848	1.00356
		476.97437	1.00352
		477.99417	1.00349
		479.01224	1.0035
		480.03137	1.00351
		481.02225	1.00343
		482.02048	1.00343
		483.03995	1.0034
		484.03711	1.00336
		485.02417	1.00338
		486.03458	1.00338
		487.03595	1.00338
		488.03937	1.0034
		489.05255	1.00336
		490.0553	1.00331
		491.04761	1.00337
		492.04895	1.00334
		493.06213	1.00335
		494.06036	1.00337
		495.07251	1.0034
		496.08292	1.00332
		497.05884	1.00331
		498.07239	1.00334
		499.08734	1.00335
		500.10364	1.0033
		501.09317	1.00335
		502.11124	1.00329
		503.11084	1.00331
		504.1181	1.0033
		505.10901	1.00331
		506.1257	1.00326
		507.13437	1.00328
		508.14789	1.00333
		509.16876	1.00331
		510.16455	1.00332
		511.17285	1.00328
		512.18359	1.0033
		513.17554	1.00327
		514.17236	1.00328
		515.16327	1.00329
		516.16461	1.00324
		517.15692	1.00323
		518.1485	1.00328
		519.16064	1.00329
		520.15784	1.00327
		521.16791	1.00328
		522.17236	1.00326
		523.1626	1.00323
		524.16113	1.00328
		525.1684	1.00328
		526.1684	1.00329
		527.16345	1.00335
		528.16168	1.00334
		529.14453	1.00337
		530.16156	1.00331
		531.15979	1.00335
		532.15454	1.0033
		533.16565	1.00326
		534.15271	1.00329
		535.14014	1.00328
		536.14911	1.00336
		537.14319	1.00331
		538.13965	1.00334
		539.14722	1.00329
		540.15765	1.00332
		541.14996	1.00332
		542.15552	1.00329
		543.15088	1.00332
		544.15503	1.00334
		545.15637	1.00329
		546.16681	1.00329
		547.16083	1.00324
		548.13782	1.00324
		549.12799	1.00322
		550.12659	1.00319
		551.12756	1.00319
		552.13379	1.00321
		553.11945	1.00321
		554.11768	1.00319
		555.1037	1.00321
		556.11169	1.00322
		557.12067	1.00322
		558.10986	1.00319
		559.10632	1.00314
		560.09546	1.00313
		561.09332	1.00314
		562.09155	1.00316
		563.08978	1.00316
		564.08099	1.00315
		565.07471	1.00317
		566.07532	1.00321
		567.06171	1.00315
		568.06134	1.00314
		569.06897	1.00317
		570.05811	1.00315
		571.06818	1.00312
		572.06641	1.00308
		573.05554	1.00314
		574.05688	1.00313
		575.0509	1.00315
		576.06134	1.00312
		577.05151	1.00316
		578.03961	1.00313
		579.03748	1.00313
		580.0434	1.00313
		581.04962	1.00319
		582.05859	1.00318
		583.05682	1.00313
		584.06586	1.00314
		585.05743	1.00317
		586.04974	1.00319
		587.03577	1.00318
		588.03711	1.00319
		589.02136	1.00323
		590.00635	1.00321
		591.0011	1.00323
		592.01044	1.00321
		593.01495	1.0032
		594.01318	1.00325
		594.99255	1.00326
		595.98065	1.00317
		596.96631	1.00319
		597.95825	1.00324
		598.94952	1.00325
		599.92126	1.00327
		600.93091	1.00326
		601.92773	1.00323
		602.93579	1.00323
		603.94385	1.00323
		604.9491	1.00321
		605.95502	1.00317
		606.974	1.00326
		607.97711	1.00324
		608.98273	1.00329
		609.99005	1.00322
		611.00165	1.0032
		612.0097	1.00325
		613.02374	1.00328
		614.03809	1.00325
		615.05035	1.00326
		616.05383	1.00315
		617.06366	1.00315
		618.06824	1.00318
		619.08221	1.00319
		620.08606	1.00322
		621.09552	1.00319
		622.11273	1.00319
		623.12079	1.00315
		624.1474	1.00323
		625.16882	1.00325
		626.19403	1.00324
		627.20172	1.00324
		628.2196	1.00328
		629.23224	1.00324
		630.26172	1.00329
		631.26624	1.00329
		632.2655	1.00324
		633.27356	1.00329
		634.30127	1.00329
		635.323	1.00329
		636.34369	1.00335
		637.3623	1.0034
		638.36859	1.00339
		639.37665	1.0034
		640.39417	1.00332
		641.41278	1.00335
		642.43591	1.00329
		643.45026	1.00332
		644.46606	1.00335
		645.47095	1.00335
		646.49023	1.00337
		647.49756	1.00335
		648.52319	1.00334
		649.54492	1.00343
		650.56207	1.00346
		651.56525	1.00352
		652.57471	1.00344
		653.59186	1.00349
		654.60168	1.00347
		655.62061	1.00346
		656.63916	1.00341
		657.67041	1.00345
		658.68756	1.00345
		659.7019	1.00346
		660.71313	1.00346
		661.73315	1.00347
		662.74261	1.0035
		663.75067	1.00348
		664.75555	1.00349
		665.77167	1.00354
		666.77167	1.00355
		667.79517	1.00356
		668.82318	1.00359
		669.83582	1.00355
		670.85968	1.00351
		671.85931	1.00361
		672.86139	1.00354
		673.86804	1.0036
		674.88696	1.00356
		675.88733	1.00359
		676.90765	1.00353
		677.93677	1.00357
		678.96198	1.00354
		679.98059	1.00354
		680.9704	1.00351
		681.97491	1.00355
		682.96442	1.00361
		683.98053	1.00355
		685.00085	1.00365
		685.99841	1.00366
		687.00928	1.00363
		688.02606	1.00365
		689.04077	1.00358
		690.04883	1.00367
		691.06116	1.00363
		692.04779	1.00361
		693.06213	1.00356
		694.08075	1.00358
		695.08246	1.00364
		696.09998	1.00361
		697.12317	1.0036
		698.14069	1.0036
		699.14978	1.0036
		700.16296	1.0036
		701.20313	1.00359
		702.21033	1.0036
		703.23969	1.00361
		704.263	1.00352
		705.27991	1.00354
		706.29962	1.00355
		707.30072	1.00362
		708.31757	1.00364
		709.32013	1.00353
		710.32587	1.0036
		711.34741	1.00361
		712.38184	1.00366
		713.38293	1.00353
		714.39301	1.0036
		715.40521	1.00356
		716.41235	1.00353
		717.4325	1.00364
		718.45581	1.00367
		719.47406	1.00367
		720.49097	1.00369
		721.50281	1.00356
		722.50745	1.00359
		723.51575	1.0036
		724.54553	1.00355
		725.55267	1.00365
		726.56134	1.00351
		727.58179	1.00352
		728.60327	1.00354
		729.61981	1.00359
		730.63489	1.00359
		731.64276	1.00356
		732.66107	1.00368
		733.67328	1.00365
		734.68835	1.00363
		735.71094	1.00363
		736.72675	1.00363
		737.73035	1.00367
		738.73608	1.0036
		739.74829	1.00366
		740.76086	1.00363
		741.77094	1.00367
		742.77563	1.0036
		743.77673	1.00366
		744.79645	1.00365
		745.81476	1.00361
		746.83484	1.00366
		747.85425	1.00361
		748.85571	1.00376
		749.8736	1.00369
		750.88013	1.00368
		751.90271	1.00366
		752.90198	1.00373
		753.91425	1.00373
		754.92932	1.00372
		755.93506	1.00377
		756.9519	1.0038
		757.95337	1.0037
		758.97491	1.00373
		759.97888	1.00376
		760.97534	1.00376
		761.98108	1.00382
		763.00079	1.00384
		764.00336	1.00385
		765.01123	1.00392
		766.0199	1.00387
		767.01453	1.00391
		768.02673	1.00386
		769.0282	1.00386
		770.02289	1.00391
		771.02362	1.004
		772.03082	1.00393
		773.0509	1.00398
		774.05988	1.004
		775.06421	1.00379
		776.06995	1.00398
		777.07751	1.00401
		778.10083	1.00397
		779.1048	1.00403
		780.11487	1.00398
		781.13062	1.00401
		782.14392	1.00401
		783.16113	1.00407
		784.17267	1.00411
		785.18951	1.00412
		786.18451	1.0041
		787.20929	1.00408
		788.23865	1.00422
		789.24908	1.00423
		790.28027	1.00432
		791.276	1.0042
		792.28357	1.00433
		793.29431	1.00442
		794.30334	1.00435
		795.30695	1.00446
		796.31915	1.00446
		797.35175	1.00455
		798.37042	1.00455
		799.37939	1.00458
		800.39734	1.0046
		801.40991	1.00459
		802.41815	1.00466
		803.43073	1.00468
		804.45654	1.00475
		805.47845	1.00478
		806.49493	1.00481
		807.52289	1.0049
		808.53833	1.00494
		809.55951	1.00496
		810.56848	1.00503
		811.58496	1.0051
		812.57825	1.00512
		813.6001	1.00524
		814.61517	1.00529
		815.63702	1.00535
		816.6568	1.00539
		817.66577	1.00544
		818.67297	1.00551
		819.69482	1.00555
		820.72076	1.00561
		821.73993	1.00567
		822.76862	1.00578
		823.76904	1.00578
		824.77716	1.00582
		825.80109	1.00593
		826.82501	1.00596
		827.82654	1.00604
		828.84937	1.00615
		829.87952	1.00618
		830.90045	1.00622
		831.92987	1.00631
		832.93762	1.00632
		833.95386	1.00641
		834.97595	1.00647
		836.00171	1.00649
		837.01276	1.0066
		838.00366	1.00663
		839.03381	1.00672
		840.05292	1.00677
		841.05334	1.00681
		842.06299	1.00686
		843.0946	1.00699
		844.08179	1.00704
		845.1123	1.00711
		846.13	1.00718
		847.13043	1.00718
		848.14917	1.0073
		849.17163	1.00735
		850.18604	1.00739
		851.21509	1.00743
		852.22174	1.00754
		853.22986	1.00759
		854.25671	1.00771
		855.26819	1.0078
		856.27338	1.00793
		857.28735	1.00793
		858.28925	1.00803
		859.29993	1.008
		860.31616	1.00806
		861.32947	1.00816
		862.33868	1.00828
		863.34021	1.00834
		864.35126	1.00844
		865.36084	1.00848
		866.3609	1.00863
		867.36945	1.00871
		868.38708	1.00873
		869.40918	1.00877
		870.41217	1.00882
		871.4137	1.00893
		872.41595	1.00891
		873.43365	1.00905
		874.43958	1.00915
		875.44586	1.00923
		876.43604	1.00929
		877.45258	1.00937
		878.46222	1.00941
		879.45898	1.00943
		880.48322	1.00951
		881.49396	1.00955
		882.47784	1.00957
		883.49225	1.00969
		884.49414	1.00976
		885.48389	1.00986
		886.50012	1.00988
		887.47925	1.00999
		888.47894	1.01005
		889.49518	1.01013
		890.49817	1.0102
		891.50299	1.01027
		892.49976	1.01032
		893.49646	1.01043
		894.49359	1.01039
		895.5014	1.01053
		896.5	1.01054
		897.50336	1.01062
		898.48541	1.01075
		899.49023	1.01078
		900.50476	1.01085
		901.51611	1.01093
		902.52142	1.01101
		903.51813	1.01108
		904.53473	1.01102
		905.53705	1.01113
		906.53412	1.01118
		907.54926	1.01129
		908.5426	1.01134
		909.56219	1.01146
		910.54797	1.01145
		911.5481	1.01155
		912.55457	1.01167
		913.56287	1.0117
		914.54535	1.01174
		915.5589	1.01185
		916.58716	1.01191
		917.57227	1.01199
		918.58844	1.01204
		919.59717	1.01211
		920.61908	1.01214
		921.6319	1.01219
		922.64551	1.01234
		923.64899	1.01229
		924.66705	1.01242
		925.6991	1.01254
		926.70105	1.01261
		927.73529	1.01263
		928.78009	1.01277
		929.79327	1.01282
		930.81854	1.01287
		931.85132	1.01285
		932.88519	1.01295
		933.92468	1.01307
		934.97095	1.01314
		936.01874	1.01324
		937.07141	1.01323
		938.13159	1.01331
		939.16919	1.01343
		940.21924	1.01349
		941.23212	1.01366
		942.26074	1.01373
		943.28522	1.01381
		944.30707	1.01385
		945.31018	1.01398
		946.33582	1.01404
		947.3573	1.01402
		948.39154	1.0141
		949.40887	1.01408
		950.41724	1.01418
		951.43536	1.01428
		952.46844	1.01432
		953.49976	1.01441
		954.51031	1.01453
		955.53143	1.01458
		956.54657	1.0147
		957.57782	1.01478
		958.61804	1.01494
		959.6377	1.01504
		960.64752	1.01507
		961.66602	1.01511
		962.69611	1.01524
		963.71802	1.01534
		964.76392	1.01537
		965.77863	1.0155
		966.80536	1.01557
		967.81744	1.0156
		968.85211	1.01578
		969.8736	1.01587
		970.88721	1.01594
		971.90527	1.016
		972.94031	1.01602
		973.96179	1.01606
		974.9754	1.01617
		976.01306	1.01624
		977.03339	1.01624
		978.05298	1.01639
		979.07489	1.01642
		980.08624	1.01659
		981.11597	1.01667
		982.12134	1.01672
		983.13306	1.01674
		984.16956	1.01689
		985.20117	1.01703
		986.20618	1.01708
		987.23291	1.01719
		988.23633	1.01726
		989.24658	1.01733
		990.27106	1.01749
		991.28992	1.01757
		992.32605	1.01761
		993.33441	1.01766
		994.35626	1.0177
		995.38263	1.01781
		996.41614	1.01792
		997.43048	1.01803
		--	--
		--	--
		--	--
		--	--
		--	--
		--	--
		--	--
		--	--
		--	--
		--	--
		--	--
		--	--
		--	--
		--	--
		--	--
		--	--
		--	--
		--	--
		--	--
		--	--
		--	--
		--	--
		--	--
		--	--
		--	--
		--	--
		--	--
		--	--
		--	--
		--	--
		--	--
		--	--
		--	--
		--	--
		--	--
		--	--
		--	--
		--	--
		--	--
		--	--
		--	--
		--	--
		--	--
		--	--
		--	--
		--	--
		--	--
		--	--
		--	--
		--	--
		--	--
		--	--
		--	--
		--	--
		--	--
		--	--
		--	--
		--	--
		--	--
		--	--
		--	--
		--	--
		--	--
		--	--
		--	--
		--	--
		--	--
		--	--
		--	--
		--	--
		--	--
		--	--
		--	--
		--	--
		--	--
		--	--
		--	--
		--	--
		--	--
		--	--
		--	--
		--	--
		--	--
		--	--
		--	--
		--	--
		--	--
		--	--
		--	--
		--	--
		--	--
		--	--
		--	--
		--	--
		--	--
		--	--
		--	--
		--	--
		--	--
		--	--
		--	--
		--	--
		--	--
		--	--
		--	--
		--	--
		--	--
		--	--
		--	--
		--	--
		--	--
		--	--
		--	--
		--	--
		--	--
		--	--
		--	--
		--	--
		--	--
		--	--
		--	--
		--	--
		--	--
		--	--
		--	--
		--	--
		--	--
		--	--
		--	--
		--	--
		--	--
		--	--
		--	--
		--	--
		--	--
		--	--
		--	--
		--	--
		--	--
		--	--
		--	--
		--	--
		--	--
		--	--
		--	--
		--	--
		--	--
		--	--
		--	--
		--	--
		--	--
		--	--
		--	--
		--	--
		--	--
		--	--
		--	--
		--	--
		--	--
		--	--
		--	--
		--	--
		--	--
		--	--
		--	--
		--	--
		--	--
		--	--
		--	--
		--	--
		--	--
		--	--
		--	--
		--	--
		--	--
		--	--
		--	--
		--	--
		--	--
		--	--
		--	--
		--	--
		--	--
		--	--
		--	--
		--	--
		--	--
		--	--
		--	--
		--	--
		--	--
		--	--
		--	--
		--	--
		--	--
		--	--
		--	--
		--	--
		--	--
		--	--
		--	--
		--	--
		--	--
		--	--
		--	--
		--	--
		--	--
		--	--
		--	--
		--	--
		--	--
		--	--
		--	--
		--	--
		--	--
		--	--
		--	--
		--	--
		--	--
		--	--
		--	--
		--	--
		--	--
		--	--
		--	--
		--	--
		--	--
		--	--
		--	--
		--	--
		--	--
		--	--
		--	--
		--	--
		--	--
		--	--
		--	--
		--	--
		--	--
		--	--
		--	--
		--	--
		--	--
		--	--
		--	--
		--	--
		--	--
		--	--
		--	--
		--	--
		--	--
		--	--
		--	--
		--	--
		--	--
		--	--
		--	--
		--	--
		--	--
		--	--
		--	--
		--	--
		--	--
		--	--
		--	--
		--	--
		--	--
		--	--
		--	--
		--	--
		--	--
		--	--
		--	--
		--	--
		--	--
		--	--
		--	--
		--	--
		--	--
		--	--
		--	--
		--	--
		--	--
		--	--
		--	--
		--	--
		--	--
		--	--
		--	--
		--	--
		--	--
		--	--
		--	--
		--	--
		--	--
		--	--
		--	--
		--	--
		--	--
		--	--
		--	--
		--	--
		--	--
		--	--
		--	--
		--	--
		--	--
		--	--
		--	--
		--	--
		--	--
		--	--
		--	--
		--	--
		--	--
		--	--
		--	--
		--	--
		--	--
		--	--
		--	--
		--	--
		--	--
		--	--
		--	--
		--	--
		--	--
		--	--
		--	--
		--	--
		--	--
		--	--
		--	--
		--	--
		--	--
		--	--
		--	--
		--	--
		--	--
		--	--
		--	--
		--	--
		--	--
		--	--
		--	--
		--	--
		--	--
		--	--
		--	--
		--	--
		--	--
		--	--
		--	--
		--	--
		--	--
		--	--
		--	--
		--	--
		--	--
		--	--
		--	--
		--	--
		--	--
		--	--
		--	--
		--	--
		--	--
		--	--
		--	--
		--	--
		--	--
		--	--
		--	--
		--	--
		--	--
		--	--
		--	--
		--	--
		--	--
		--	--
		--	--
		--	--
		--	--
		--	--
		--	--
		--	--
		--	--
		--	--
		--	--
		--	--
		--	--
		--	--
		--	--
		--	--
		--	--
		--	--
		--	--
		--	--
		--	--
		--	--
		--	--
		--	--
		--	--
		--	--
		--	--
		--	--
		--	--
		--	--
		--	--
		--	--
		--	--
		--	--
		--	--
		--	--
		--	--
		--	--
		--	--
		--	--
		--	--
		--	--
		--	--
		--	--
		--	--
		--	--
		--	--
		--	--
		--	--
		--	--
		--	--
		--	--
		--	--
