# Supplementary material for: The methanol electrooxidation activity and the CO-resilient surface of a La x Fe 1− y − z Cu y Pd z O 3 perovskite
Source: Royal Society of Chemistry journal article supplement (doi:10.1039/d5ta04846j), 2026-01-01
Supplement: d5ta04846j4.xlsx [file d5ta04846j4.xlsx]

## Sheet: Feuil1
B.E.		Cycle 0:O 1s/10:CPS	O 1s/10:O 1s	O 1s/10:O 1s	O 1s/10:O 1s	Background	Envelope		B.E.		Cycle 0:C 1s/11:CPS	C 1s/11:C 1s	C 1s/11:C 1s	C 1s/11:C 1s	Background	Envelope		B.E.		Cycle 0:La 3d/12:CPS	La 3d/12:La 3d	La 3d/12:La 3d	La 3d/12:La 3d	La 3d/12:La 3d	La 3d/12:La 3d	La 3d/12:La 3d	La 3d/12:La 3d	La 3d/12:La 3d	Background	Envelope		B.E.		Cycle 0:Fe 2p/13:CPS	Fe 2p/13:Fe 2p	Fe 2p/13:Fe 2p	Fe 2p/13:Fe 2p	Fe 2p/13:Fe 2p	Fe 2p/13:Fe 2p	Fe 2p/13:Fe 2p	Fe 2p/13:Fe 2p	Fe 2p/13:Fe 2p	Background	Envelope		B.E.		Cycle 0:Cu 2p/14:CPS	Cu 2p/14:Cu 2p
542	544.8	7461.111	7466.85	7468.943	7461.832	7461.111	7475.403		295	297.8	5285.333	5288.435	5287.004	5286.251	5285.333	5291.023		875	877.8	40464.89	40467.72	40468.31	40471	40470.42	40475.8	40469.13	40465.65	40465.07	40464.89	40498.88		745	747.8	14058.67	14060.92	14059.15	14060.62	14058.94	14058.97	14058.76	14058.98	14059.12	14058.67	14064.79		975	977.8	46186.13	46186.35
541.9	544.7	7620	7625.808	7627.951	7620.734	7620	7634.493		294.9	297.7	5143.333	5146.483	5145.043	5144.267	5143.333	5149.126		874.9	877.7	40469.33	40472.18	40472.77	40475.49	40474.92	40480.44	40473.63	40470.1	40469.51	40469.33	40503.71		744.9	747.7	13947.11	13949.39	13947.6	13949.07	13947.38	13947.42	13947.21	13947.43	13947.57	13947.11	13953.29		974.9	977.7	46264.4	46264.61
541.8	544.6	7552.222	7558.099	7560.295	7552.97	7552.222	7566.918		294.8	297.6	5120	5123.2	5121.749	5120.949	5120	5125.898		874.8	877.6	40437.33	40440.19	40440.79	40443.54	40442.97	40448.65	40441.69	40438.11	40437.51	40437.33	40472.11		744.8	747.6	13968.89	13971.19	13969.38	13970.86	13969.17	13969.2	13968.99	13969.21	13969.35	13968.89	13975.11		974.8	977.6	46524.93	46525.15
541.7	544.5	7337.778	7343.723	7345.975	7338.539	7337.778	7352.681		294.7	297.5	5118	5121.251	5119.79	5118.965	5118	5124.006		874.7	877.5	40423.11	40425.99	40426.59	40429.36	40428.79	40434.63	40427.52	40423.89	40423.29	40423.11	40458.29		744.7	747.5	13958.67	13960.98	13959.16	13960.65	13958.95	13958.98	13958.77	13958.99	13959.13	13958.67	13964.94		974.7	977.5	46540.8	46541.02
541.6	544.4	7322.222	7328.236	7330.546	7322.998	7322.222	7337.336		294.6	297.4	5096	5099.303	5097.832	5096.982	5096	5102.117		874.6	877.4	40447.56	40450.44	40451.06	40453.85	40453.29	40459.29	40452.03	40448.34	40447.74	40447.56	40483.15		744.6	747.4	14103.11	14105.45	14103.61	14105.11	14103.4	14103.42	14103.21	14103.43	14103.58	14103.11	14109.43		974.6	977.4	46704.13	46704.35
541.5	544.3	7391.111	7397.193	7399.565	7391.901	7391.111	7406.438		294.5	297.3	5156	5159.356	5157.876	5156.999	5156	5162.232		874.5	877.3	40504.89	40507.79	40508.41	40511.23	40510.67	40516.84	40509.42	40505.68	40505.07	40504.89	40540.9		744.5	747.3	14201.33	14203.69	14201.84	14203.34	14201.62	14201.65	14201.44	14201.66	14201.8	14201.33	14207.7		974.5	977.3	46757.73	46757.95
541.4	544.2	7522.222	7528.376	7530.81	7523.028	7522.222	7537.769		294.4	297.2	5160.667	5164.078	5162.589	5161.683	5160.667	5167.016		874.4	877.2	40611.56	40614.47	40615.1	40617.95	40617.39	40623.74	40616.15	40612.35	40611.74	40611.56	40648.01		744.4	747.2	14095.11	14097.49	14095.62	14097.13	14095.4	14095.43	14095.21	14095.44	14095.59	14095.11	14101.53		974.4	977.2	46688.8	46689.02
541.3	544.1	7450	7456.254	7458.724	7450.821	7450	7465.8		294.3	297.1	5176.667	5180.134	5178.636	5177.701	5176.667	5183.138		874.3	877.1	40458.22	40461.16	40461.78	40464.66	40464.11	40470.64	40462.88	40459.02	40458.41	40458.22	40495.11		744.3	747.1	14128.89	14131.28	14129.4	14130.92	14129.19	14129.21	14128.99	14129.22	14129.37	14128.89	14135.35		974.3	977.1	46757.33	46757.55
541.2	544	7356.667	7363.021	7365.531	7357.504	7356.667	7372.722		294.2	297	5062	5065.525	5064.018	5063.053	5062	5068.597		874.2	877	40323.56	40326.5	40327.14	40330.05	40329.5	40336.22	40328.28	40324.36	40323.74	40323.56	40360.9		744.2	747	13980	13982.42	13980.52	13982.04	13980.3	13980.32	13980.11	13980.33	13980.48	13980	13986.52		974.2	977	46757.33	46757.55
541.1	543.9	7414.444	7420.9	7423.452	7415.298	7414.444	7430.76		294.1	296.9	5076	5079.584	5078.069	5077.072	5076	5082.725		874.1	876.9	40136	40138.96	40139.6	40142.54	40141.99	40148.91	40140.79	40136.81	40136.19	40136	40173.8		744.1	746.9	14038.22	14040.66	14038.75	14040.27	14038.53	14038.55	14038.33	14038.56	14038.7	14038.22	14044.79		974.1	976.9	46662.4	46662.62
541	543.8	7331.111	7337.667	7340.265	7331.981	7331.111	7347.691		294	296.8	5102	5105.644	5104.122	5103.092	5102	5108.858		874	876.8	40197.78	40200.76	40201.4	40204.37	40203.83	40210.95	40202.64	40198.59	40197.97	40197.78	40236.05		744	746.8	14028.89	14031.35	14029.42	14030.95	14029.2	14029.21	14029	14029.22	14029.37	14028.89	14035.51		974	976.8	46778.53	46778.76
540.9	543.7	7304.444	7311.1	7313.749	7305.332	7304.444	7321.292		293.9	296.7	5138.667	5142.373	5140.844	5139.779	5138.667	5145.662		873.9	876.7	40155.11	40158.1	40158.76	40161.75	40161.21	40168.54	40160.04	40155.93	40155.3	40155.11	40193.86		743.9	746.7	14077.33	14079.81	14077.87	14079.41	14077.65	14077.66	14077.44	14077.67	14077.82	14077.33	14084		973.9	976.7	46833.07	46833.29
540.8	543.6	7337.778	7344.534	7347.236	7338.684	7337.778	7354.898		293.8	296.6	5052.667	5056.437	5054.901	5053.799	5052.667	5059.804		873.8	876.6	39999.11	40002.12	40002.78	40005.8	40005.27	40012.82	40004.11	39999.94	39999.3	39999.11	40038.36		743.8	746.6	14088	14090.5	14088.54	14090.06	14088.32	14088.33	14088.11	14088.34	14088.49	14088	14094.7		973.8	976.6	46773.33	46773.56
540.7	543.5	7453.333	7460.19	7462.95	7454.258	7453.333	7470.73		293.7	296.5	5120	5123.835	5122.294	5121.154	5120	5127.283		873.7	876.5	40133.78	40136.8	40137.46	40140.52	40139.99	40147.76	40138.85	40134.61	40133.97	40133.78	40173.53		743.7	746.5	14062.67	14065.19	14063.21	14064.74	14062.99	14063	14062.78	14063.01	14063.16	14062.67	14069.42		973.7	976.5	46815.87	46816.09
540.6	543.4	7428.889	7435.846	7438.667	7429.832	7428.889	7446.567		293.6	296.4	5096.667	5100.569	5099.022	5097.843	5096.667	5104.101		873.6	876.4	40108	40111.04	40111.71	40114.8	40114.27	40122.28	40113.15	40108.84	40108.19	40108	40148.27		743.6	746.4	14030.67	14033.21	14031.22	14032.75	14031	14031	14030.78	14031.01	14031.16	14030.67	14037.47		973.6	976.4	46837.2	46837.43
540.5	543.3	7468.889	7475.946	7478.833	7469.852	7468.889	7486.854		293.5	296.3	5052.667	5056.638	5055.086	5053.865	5052.667	5060.256		873.5	876.3	40243.56	40246.61	40247.28	40250.41	40249.89	40258.13	40248.78	40244.4	40243.75	40243.56	40284.36		743.5	746.3	14081.33	14083.9	14081.89	14083.43	14081.67	14081.67	14081.45	14081.68	14081.83	14081.33	14088.19		973.5	976.3	46997.2	46997.43
540.4	543.2	7427.778	7434.84	7437.892	7428.761	7427.778	7445.939		293.4	296.2	5070.667	5074.709	5073.154	5071.888	5070.667	5078.417		873.4	876.2	40326.22	40329.29	40329.97	40333.13	40332.61	40341.12	40331.53	40327.07	40326.42	40326.22	40367.57		743.4	746.2	14102.22	14104.81	14102.78	14104.33	14102.56	14102.56	14102.34	14102.57	14102.73	14102.22	14109.13		973.4	976.2	47074.4	47074.63
540.3	543.1	7387.778	7394.942	7398.067	7388.782	7387.778	7406.237		293.3	296.1	5074.667	5078.781	5077.224	5075.912	5074.667	5082.583		873.3	876.1	40393.78	40396.86	40397.54	40400.74	40400.23	40408.99	40399.16	40394.63	40393.98	40393.78	40435.68		743.3	746.1	14124	14126.62	14124.57	14126.12	14124.35	14124.34	14124.12	14124.35	14124.51	14124	14130.97		973.3	976.1	47185.47	47185.7
540.2	543	7433.333	7440.602	7443.802	7434.36	7433.333	7452.098		293.2	296	5050	5054.189	5052.63	5051.27	5050	5058.089		873.2	876	40279.11	40282.21	40282.9	40286.12	40285.62	40294.66	40284.58	40279.97	40279.31	40279.11	40321.59		743.2	746	14115.11	14117.75	14115.68	14117.24	14115.46	14115.46	14115.23	14115.47	14115.62	14115.11	14122.14		973.2	976	47342.8	47343.03
540.1	542.9	7452.222	7459.598	7462.875	7453.271	7452.222	7471.299		293.1	295.9	4977.333	4981.599	4980.04	4978.628	4977.333	4985.6		873.1	875.9	40197.33	40200.44	40201.14	40204.4	40203.9	40213.22	40202.88	40198.2	40197.53	40197.33	40240.4		743.1	745.9	14181.78	14184.44	14182.36	14183.92	14182.14	14182.12	14181.9	14182.14	14182.29	14181.78	14188.86		973.1	975.9	47576.13	47576.37
540	542.8	7412.222	7419.707	7423.064	7413.294	7412.222	7431.621		293	295.8	4991.333	4995.678	4994.119	4992.654	4991.333	4999.785		873	875.8	40313.78	40316.9	40317.61	40320.9	40320.41	40330.03	40319.41	40314.65	40313.98	40313.78	40357.45		743	745.8	14196.89	14199.58	14197.47	14199.04	14197.25	14197.24	14197.01	14197.25	14197.4	14196.89	14204.03		973	975.8	47790.13	47790.37
539.9	542.7	7505.556	7513.151	7516.592	7506.651	7505.556	7525.283		292.9	295.7	5098	5102.425	5100.869	5099.348	5098	5106.642		872.9	875.7	40465.33	40468.47	40469.18	40472.52	40472.03	40481.95	40471.05	40466.21	40465.54	40465.33	40509.62		742.9	745.7	14185.78	14188.49	14186.37	14187.94	14186.15	14186.13	14185.91	14186.14	14186.3	14185.78	14192.98		972.9	975.7	47733.47	47733.7
539.8	542.6	7427.778	7435.487	7439.013	7428.898	7427.778	7447.844		292.8	295.6	5063.333	5067.842	5066.289	5064.709	5063.333	5072.173		872.8	875.6	40466.67	40469.82	40470.54	40473.91	40473.43	40483.67	40472.48	40467.55	40466.87	40466.67	40511.6		742.8	745.6	14240	14242.74	14240.6	14242.18	14240.38	14240.35	14240.13	14240.37	14240.52	14240	14247.26		972.8	975.6	47722.53	47722.77
539.7	542.5	7552.222	7560.048	7563.663	7553.369	7552.222	7572.635		292.7	295.5	5090	5094.594	5093.047	5091.404	5090	5099.045		872.7	875.5	40363.11	40366.28	40367	40370.41	40369.94	40380.51	40369.01	40364	40363.32	40363.11	40408.69		742.7	745.5	14235.56	14238.32	14236.16	14237.74	14235.94	14235.91	14235.69	14235.93	14236.08	14235.56	14242.88		972.7	975.5	47750.8	47751.04
539.6	542.4	7570	7577.945	7581.651	7571.173	7570	7590.769		292.6	295.4	5084.667	5089.349	5087.809	5086.1	5084.667	5093.925		872.6	875.4	40195.11	40198.3	40199.02	40202.47	40202	40212.93	40201.11	40196.01	40195.32	40195.11	40241.37		742.6	745.4	14136.44	14139.23	14137.05	14138.65	14136.83	14136.8	14136.58	14136.82	14136.97	14136.44	14143.83		972.6	975.4	47826.93	47827.17
539.5	542.3	7520	7528.067	7531.868	7521.2	7520	7541.135		292.5	295.3	5032	5036.772	5035.243	5033.464	5032	5041.479		872.5	875.3	40315.56	40318.76	40319.49	40322.97	40322.51	40333.8	40321.64	40316.46	40315.77	40315.56	40362.51		742.5	745.3	14116.44	14119.26	14117.06	14118.66	14116.84	14116.81	14116.58	14116.82	14116.98	14116.44	14123.89		972.5	975.3	47665.6	47665.84
539.4	542.2	7321.111	7329.302	7333.202	7322.34	7321.111	7342.622		292.4	295.2	5046	5050.866	5049.347	5047.495	5046	5055.708		872.4	875.2	40184.44	40187.66	40188.4	40191.92	40191.47	40203.14	40190.63	40185.35	40184.66	40184.44	40232.12		742.4	745.2	14211.56	14214.4	14212.18	14213.78	14211.96	14211.92	14211.69	14211.93	14212.09	14211.56	14219.06		972.4	975.2	47817.73	47817.97
539.3	542.1	7316.667	7324.986	7328.986	7317.925	7316.667	7338.563		292.3	295.1	5014	5018.962	5017.458	5015.528	5014	5023.947		872.3	875.1	40204.44	40207.67	40208.42	40211.99	40211.54	40223.6	40210.73	40205.36	40204.66	40204.44	40252.85		742.3	745.1	14191.11	14193.98	14191.74	14193.35	14191.52	14191.48	14191.25	14191.49	14191.65	14191.11	14198.68		972.3	975.1	47862.8	47863.04
539.2	542	7322.222	7330.672	7334.777	7323.511	7322.222	7344.515		292.2	295	5076	5081.061	5079.573	5077.561	5076	5086.195		872.2	875	40157.33	40160.58	40161.33	40164.94	40164.5	40176.97	40163.72	40158.25	40157.55	40157.33	40206.5		742.2	745	14127.56	14130.45	14128.19	14129.81	14127.97	14127.93	14127.7	14127.94	14128.1	14127.56	14135.19		972.2	975	48013.07	48013.31
539.1	541.9	7322.222	7330.805	7335.02	7323.543	7322.222	7344.923		292.1	294.9	5066	5071.162	5069.695	5067.595	5066	5076.453		872.1	874.9	40000.44	40003.7	40004.46	40008.11	40007.68	40020.58	40006.94	40001.37	40000.66	40000.44	40050.4		742.1	744.9	14184	14186.92	14184.64	14186.26	14184.42	14184.37	14184.14	14184.39	14184.55	14184	14191.7		972.1	974.9	47993.87	47994.11
539	541.8	7184.444	7193.164	7197.491	7185.798	7184.444	7207.564		292	294.8	5062	5067.267	5065.823	5063.631	5062	5072.721		872	874.8	40108.44	40111.72	40112.48	40116.17	40115.75	40129.11	40115.05	40109.38	40108.66	40108.44	40159.22		742	744.8	14159.11	14162.06	14159.76	14161.39	14159.54	14159.49	14159.26	14159.5	14159.66	14159.11	14166.88		972	974.8	47988.53	47988.78
538.9	541.7	7242.222	7251.082	7255.526	7243.61	7242.222	7265.774		291.9	294.7	5049.333	5054.709	5053.292	5051.001	5049.333	5060.335		871.9	874.7	40130.67	40133.96	40134.72	40138.46	40138.05	40151.88	40137.38	40131.61	40130.89	40130.67	40182.27		741.9	744.7	14146.22	14149.2	14146.88	14148.51	14146.66	14146.6	14146.37	14146.62	14146.77	14146.22	14154.06		971.9	974.7	48016.53	48016.78
538.8	541.6	7175.556	7184.559	7189.124	7176.978	7175.556	7199.55		291.8	294.6	5030.667	5036.154	5034.767	5032.373	5030.667	5041.96		871.8	874.6	40124.89	40128.19	40128.96	40132.75	40132.35	40146.68	40131.72	40125.84	40125.11	40124.89	40177.37		741.8	744.6	14148.44	14151.45	14149.11	14150.75	14148.89	14148.83	14148.6	14148.84	14149	14148.44	14156.35		971.8	974.6	48217.73	48217.98
538.7	541.5	7198.889	7208.04	7212.73	7200.349	7198.889	7223.34		291.7	294.5	5050.667	5056.269	5054.918	5052.412	5050.667	5062.265		871.7	874.5	40149.33	40152.65	40153.43	40157.26	40156.86	40171.72	40156.28	40150.29	40149.56	40149.33	40202.71		741.7	744.5	14152	14155.04	14152.67	14154.32	14152.45	14152.38	14152.15	14152.4	14152.56	14152	14159.98		971.7	974.5	48368.13	48368.38
538.6	541.4	7066.667	7075.968	7080.789	7068.164	7066.667	7091.588		291.6	294.4	5034	5039.721	5038.409	5035.787	5034	5045.917		871.6	874.4	40015.56	40018.89	40019.67	40023.55	40023.16	40038.57	40022.62	40016.52	40015.78	40015.56	40069.88		741.6	744.4	14304	14307.07	14304.68	14306.33	14304.46	14304.39	14304.16	14304.4	14304.56	14304	14312.05		971.6	974.4	48486.8	48487.05
538.5	541.3	7074.444	7083.9	7088.856	7075.982	7074.444	7099.85		291.5	294.3	5066	5071.844	5070.578	5067.829	5066	5078.25		871.5	874.3	40132	40135.35	40136.14	40140.06	40139.69	40155.67	40139.19	40132.97	40132.23	40132	40187.29		741.5	744.3	14351.11	14354.21	14351.8	14353.46	14351.58	14351.5	14351.27	14351.52	14351.68	14351.11	14359.23		971.5	974.3	48542.27	48542.52
538.4	541.2	7083.333	7092.948	7098.044	7084.912	7083.333	7109.237		291.4	294.2	5041.333	5047.304	5046.089	5043.206	5041.333	5053.932		871.4	874.2	40062.22	40065.58	40066.38	40070.35	40069.99	40086.59	40069.54	40063.2	40062.45	40062.22	40118.53		741.4	744.2	14210.67	14213.79	14211.36	14213.03	14211.15	14211.06	14210.83	14211.08	14211.24	14210.67	14218.86		971.4	974.2	48709.73	48709.99
538.3	541.1	6956.667	6966.443	6971.685	6958.289	6956.667	6983.084		291.3	294.1	5024	5030.101	5028.945	5025.919	5024	5036.964		871.3	874.1	39976	39979.38	39980.18	39984.2	39983.85	40001.1	39983.45	39976.98	39976.23	39976	40033.35		741.3	744.1	14216.44	14219.6	14217.15	14218.82	14216.93	14216.84	14216.61	14216.86	14217.02	14216.44	14224.72		971.3	974.1	48843.6	48843.85
538.2	541	6968.889	6978.832	6984.225	6970.556	6968.889	6995.836		291.2	294	4970.667	4976.903	4975.811	4972.632	4970.667	4984.013		871.2	874	40205.33	40208.73	40209.53	40213.6	40213.26	40231.2	40212.91	40206.32	40205.56	40205.33	40263.79		741.2	744	14211.11	14214.3	14211.82	14213.5	14211.61	14211.51	14211.28	14211.53	14211.69	14211.11	14219.46		971.2	974	48987.33	48987.59
538.1	540.9	6860	6870.114	6875.665	6861.714	6860	6887.493		291.1	293.9	5042	5048.376	5047.358	5044.015	5042	5055.749		871.1	873.9	40264.44	40267.85	40268.66	40272.79	40272.45	40291.13	40272.16	40265.44	40264.68	40264.44	40324.05		741.1	743.9	14355.11	14358.33	14355.83	14357.51	14355.62	14355.51	14355.28	14355.53	14355.69	14355.11	14363.54		971.1	973.9	48924.8	48925.06
538	540.8	6880	6890.289	6896.004	6881.763	6880	6908.056		291	293.8	4982.667	4989.187	4988.251	4984.732	4982.667	4996.837		871	873.8	40101.78	40105.21	40106.02	40110.19	40109.87	40129.32	40109.64	40102.78	40102.01	40101.78	40162.59		741	743.8	14374.22	14377.48	14374.95	14376.64	14374.74	14374.63	14374.39	14374.65	14374.81	14374.22	14382.73		971	973.8	49152.27	49152.52
537.9	540.7	6744.444	6754.914	6760.798	6746.258	6744.444	6773.081		290.9	293.7	5000.667	5007.336	5006.494	5002.785	5000.667	5015.282		870.9	873.7	40209.78	40213.23	40214.04	40218.27	40217.96	40238.24	40217.78	40210.79	40210.01	40209.78	40271.86		740.9	743.7	14333.78	14337.06	14334.51	14336.21	14334.31	14334.19	14333.95	14334.21	14334.37	14333.78	14342.36		970.9	973.7	49180.67	49180.93
537.8	540.6	6880	6890.654	6896.716	6881.867	6880	6909.237		290.8	293.6	5036.667	5043.491	5042.752	5038.84	5036.667	5051.749		870.8	873.6	40257.78	40261.25	40262.06	40266.34	40266.04	40287.21	40265.93	40258.79	40258.02	40257.78	40321.19		740.8	743.6	14300.44	14303.76	14301.19	14302.89	14300.98	14300.86	14300.62	14300.88	14301.04	14300.44	14309.11		970.8	973.6	49297.6	49297.86
537.7	540.5	6788.889	6799.732	6805.979	6790.811	6788.889	6818.745		290.7	293.5	4982	4988.984	4988.362	4984.23	4982	4997.577		870.7	873.5	40230.67	40234.15	40234.97	40239.3	40239.02	40261.13	40238.97	40231.69	40230.91	40230.67	40295.48		740.7	743.5	14279.56	14282.91	14280.31	14282.02	14280.11	14279.97	14279.74	14279.99	14280.15	14279.56	14288.3		970.7	973.5	49408.93	49409.19
537.6	540.4	6790	6801.038	6807.476	6791.981	6790	6820.495		290.6	293.4	4936	4943.15	4942.658	4938.29	4936	4952.098		870.6	873.4	40334.22	40337.73	40338.54	40342.94	40342.66	40365.79	40342.69	40335.25	40334.46	40334.22	40400.51		740.6	743.4	14473.78	14477.17	14474.54	14476.25	14474.34	14474.2	14473.96	14474.22	14474.38	14473.78	14482.61		970.6	973.4	49496	49496.26
537.5	540.3	6747.778	6759.016	6765.655	6749.819	6747.778	6778.935		290.5	293.3	4966	4973.322	4972.976	4968.352	4966	4982.649		870.5	873.3	40403.56	40407.08	40407.9	40412.35	40412.09	40436.29	40412.18	40404.59	40403.8	40403.56	40471.4		740.5	743.3	14428.44	14431.87	14429.22	14430.93	14429.02	14428.87	14428.63	14428.89	14429.05	14428.44	14437.36		970.5	973.3	49586.93	49587.2
537.4	540.2	6712.222	6723.666	6730.514	6714.328	6712.222	6744.063		290.4	293.2	4992	4999.5	4999.318	4994.416	4992	5009.234		870.4	873.2	40207.11	40210.66	40211.48	40215.98	40215.74	40241.1	40215.9	40208.16	40207.36	40207.11	40276.6		740.4	743.2	14450.22	14453.68	14451	14452.73	14450.81	14450.65	14450.41	14450.67	14450.83	14450.22	14459.22		970.4	973.2	49618	49618.26
537.3	540.1	6843.333	6854.988	6862.053	6845.506	6843.333	6875.88		290.3	293.1	4992	4999.684	4999.686	4994.483	4992	5009.854		870.3	873.1	40307.56	40311.12	40311.96	40316.5	40316.28	40342.88	40316.52	40308.61	40307.8	40307.56	40378.79		740.3	743.1	14305.33	14308.83	14306.12	14307.85	14305.93	14305.76	14305.53	14305.78	14305.95	14305.33	14314.42		970.3	973.1	49651.73	49652
537.2	540	6751.111	6762.983	6770.276	6753.353	6751.111	6784.39		290.2	293	4992.667	5000.543	5000.751	4995.219	4992.667	5011.18		870.2	873	40308	40311.59	40312.43	40317.03	40316.82	40344.76	40317.14	40309.06	40308.25	40308	40381.07		740.2	743	14330.22	14333.75	14331.02	14332.76	14330.83	14330.65	14330.42	14330.68	14330.84	14330.22	14339.4		970.2	973	49728.13	49728.4
537.1	539.9	6810	6822.095	6829.625	6812.316	6810	6844.036		290.1	292.9	4972	4980.075	4980.515	4974.626	4972	4991.215		870.1	872.9	40247.11	40250.72	40251.57	40256.22	40256.02	40285.42	40256.44	40248.18	40247.36	40247.11	40322.16		740.1	742.9	14410.67	14414.23	14411.48	14413.22	14411.29	14411.1	14410.87	14411.12	14411.29	14410.67	14419.94		970.1	972.9	49774.4	49774.67
537	539.8	6711.111	6723.436	6731.213	6713.504	6711.111	6745.931		290	292.8	5035.333	5043.615	5044.316	5038.035	5035.333	5055.299		870	872.8	40279.11	40282.74	40283.6	40288.31	40288.12	40319.06	40288.63	40280.19	40279.36	40279.11	40356.24		740	742.8	14382.22	14385.83	14383.04	14384.79	14382.86	14382.66	14382.43	14382.68	14382.85	14382.22	14391.58		970	972.8	49746.93	49747.2
536.9	539.7	6733.333	6745.894	6753.931	6735.808	6733.333	6768.966		289.9	292.7	5007.333	5015.829	5016.823	5010.115	5007.333	5028.101		869.9	872.7	40213.33	40216.98	40217.85	40222.61	40222.45	40255.09	40223.04	40214.42	40213.59	40213.33	40292.7		739.9	742.7	14443.11	14446.75	14443.94	14445.69	14443.76	14443.55	14443.32	14443.58	14443.74	14443.11	14452.57		969.9	972.7	49498.53	49498.8
536.8	539.6	6724.444	6737.248	6745.555	6727.004	6724.444	6760.919		289.8	292.6	4962.667	4971.386	4972.713	4965.531	4962.667	4984.297		869.8	872.6	40210.67	40214.33	40215.22	40220.03	40219.88	40254.34	40220.58	40211.76	40210.92	40210.67	40292.4		739.8	742.6	14391.11	14394.79	14391.95	14393.71	14391.78	14391.56	14391.33	14391.58	14391.75	14391.11	14400.66		969.8	972.6	49415.07	49415.34
536.7	539.5	6637.778	6650.832	6659.422	6640.427	6637.778	6675.126		289.7	292.5	4974.667	4983.618	4985.318	4977.618	4974.667	4997.22		869.7	872.5	40180	40183.69	40184.58	40189.45	40189.32	40225.8	40190.12	40181.1	40180.26	40180	40264.31		739.7	742.5	14425.33	14429.06	14426.18	14427.95	14426.02	14425.78	14425.55	14425.81	14425.97	14425.33	14434.98		969.7	972.5	49404.27	49404.54
536.6	539.4	6594.444	6607.757	6616.643	6597.189	6594.444	6632.7		289.6	292.4	5042.667	5051.859	5053.988	5045.709	5042.667	5066.223		869.6	872.4	40048.89	40052.6	40053.5	40058.43	40058.31	40096.94	40059.22	40050	40049.15	40048.89	40135.92		739.6	742.4	14364.44	14368.21	14365.31	14367.08	14365.14	14364.9	14364.67	14364.92	14365.09	14364.44	14374.19		969.6	972.4	49339.6	49339.88
536.5	539.3	6576.667	6590.244	6599.44	6579.512	6576.667	6615.862		289.5	292.3	4983.333	4992.777	4995.386	4986.471	4983.333	5007.968		869.5	872.3	40126.22	40129.95	40130.86	40135.85	40135.75	40176.78	40136.77	40127.34	40126.49	40126.22	40216.24		739.5	742.3	14341.78	14345.58	14342.65	14344.43	14342.49	14342.23	14342.01	14342.26	14342.43	14341.78	14351.63		969.5	972.3	49078.93	49079.21
536.4	539.2	6617.778	6631.629	6641.151	6620.728	6617.778	6657.952		289.4	292.2	5045.333	5055.039	5058.206	5048.57	5045.333	5071.148		869.4	872.2	40211.56	40215.3	40216.23	40221.27	40221.2	40264.77	40222.33	40212.68	40211.82	40211.56	40304.71		739.4	742.2	14464.44	14468.29	14465.33	14467.11	14465.18	14464.9	14464.68	14464.93	14465.1	14464.44	14474.4		969.4	972.2	48997.73	48998.01
536.3	539.1	6448.889	6463.022	6472.885	6451.951	6448.889	6490.08		289.3	292.1	4999.333	5009.312	5013.107	5002.675	4999.333	5026.428		869.3	872.1	40179.56	40183.32	40184.26	40189.36	40189.31	40235.75	40190.57	40180.69	40179.82	40179.56	40276.2		739.3	742.1	14346.22	14350.11	14347.12	14348.9	14346.97	14346.69	14346.46	14346.71	14346.88	14346.22	14356.28		969.3	972.1	48769.2	48769.48
536.2	539	6482.222	6496.645	6506.865	6485.403	6482.222	6524.469		289.2	292	4966	4976.263	4980.793	4969.452	4966	4994.508		869.2	872	40034.22	40038.01	40038.95	40044.12	40044.09	40093.57	40045.48	40035.37	40034.49	40034.22	40134.53		739.2	742	14289.78	14293.71	14290.68	14292.48	14290.54	14290.24	14290.02	14290.27	14290.44	14289.78	14299.94		969.2	972	48585.6	48585.88
536.1	538.9	6454.444	6469.167	6479.764	6457.751	6454.444	6497.793		289.1	291.9	5046.667	5057.227	5062.596	5050.234	5046.667	5076.724		869.1	871.9	39895.11	39898.92	39899.87	39905.1	39905.09	39958.03	39906.62	39896.27	39895.38	39895.11	39999.51		739.1	741.9	14300.89	14304.86	14301.81	14303.6	14301.67	14301.36	14301.14	14301.39	14301.56	14300.89	14311.16		969.1	971.9	48398.53	48398.82
536	538.8	6414.444	6429.476	6440.467	6417.884	6414.444	6458.938		289	291.8	5064	5074.87	5081.232	5067.689	5064	5095.79		869	871.8	39812.44	39816.27	39817.24	39822.53	39822.54	39879.12	39824.22	39813.61	39812.72	39812.44	39921.14		739	741.8	14354.67	14358.68	14355.6	14357.4	14355.47	14355.14	14354.92	14355.17	14355.34	14354.67	14365.05		969	971.8	48245.73	48246.02
535.9	538.7	6366.667	6382.017	6393.422	6370.248	6366.667	6412.354		288.9	291.7	5078.667	5089.861	5097.381	5082.483	5078.667	5112.392		868.9	871.7	39966.22	39970.07	39971.04	39976.41	39976.44	40037.19	39978.27	39967.39	39966.5	39966.22	40079.75		738.9	741.7	14191.56	14195.62	14192.5	14194.31	14192.38	14192.03	14191.81	14192.06	14192.23	14191.56	14202.05		968.9	971.7	48088	48088.28
535.8	538.6	6305.556	6321.235	6333.077	6309.288	6305.556	6352.489		288.8	291.6	5047.333	5058.866	5067.787	5051.285	5047.333	5083.271		868.8	871.6	39819.11	39822.98	39823.96	39829.39	39829.45	39894.58	39831.43	39820.29	39819.39	39819.11	39937.7		738.8	741.6	14299.56	14303.67	14300.51	14302.32	14300.4	14300.04	14299.82	14300.07	14300.24	14299.56	14310.17		968.8	971.6	47907.33	47907.62
535.7	538.5	6267.778	6283.797	6296.097	6271.671	6267.778	6316.009		288.7	291.5	5096.667	5108.555	5119.167	5100.76	5096.667	5135.148		868.7	871.5	39824	39827.89	39828.88	39834.38	39834.46	39904.63	39836.61	39825.19	39824.28	39824	39948.32		738.7	741.5	14344.44	14348.6	14345.41	14347.23	14345.31	14344.93	14344.71	14344.96	14345.13	14344.44	14355.18		968.7	971.5	47675.2	47675.49
535.6	538.4	6350	6366.37	6379.154	6354.064	6350	6399.589		288.6	291.4	5046	5058.259	5070.957	5050.243	5046	5087.46		868.6	871.4	39859.56	39863.46	39864.47	39870.04	39870.14	39945.58	39872.47	39860.76	39859.84	39859.56	39989.86		738.6	741.4	14292	14296.2	14292.98	14294.8	14292.89	14292.49	14292.27	14292.52	14292.69	14292	14302.85		968.6	971.4	47554.93	47555.22
535.5	538.3	6146.667	6163.4	6176.694	6150.914	6146.667	6197.675		288.5	291.3	4958.667	5043.238	5058.513	5034.992	5030.59	5075.563		868.5	871.3	39971.56	39975.48	39976.5	39982.14	39982.27	40063.79	39984.78	39972.77	39971.84	39971.56	40108.68		738.5	741.3	14271.56	14275.81	14272.55	14274.38	14272.47	14272.05	14271.84	14272.08	14272.25	14271.56	14282.53		968.5	971.3	47349.47	47349.76
535.4	538.2	6127.778	6144.886	6158.716	6132.221	6127.778	6180.267		288.4	291.2	5087.333	5043.585	5062.11	5035.098	5030.529	5079.736		868.4	871.2	39848.89	39852.84	39853.86	39859.58	39859.73	39947.59	39862.44	39850.11	39849.18	39848.89	39993.1		738.4	741.2	14202.22	14206.52	14203.23	14205.06	14203.16	14202.72	14202.51	14202.75	14202.92	14202.22	14213.32		968.4	971.2	47225.73	47226.03
535.3	538.1	6050	6067.496	6081.895	6054.653	6050	6104.044		288.3	291.1	5036	5044.007	5066.702	5035.27	5030.523	5084.934		868.3	871.1	39954.67	39958.63	39959.67	39965.46	39965.64	40060.86	39968.56	39955.9	39954.96	39954.67	40107		738.3	741.1	14093.78	14098.13	14094.8	14096.64	14094.74	14094.28	14094.07	14094.32	14094.48	14093.78	14105.01		968.3	971.1	47002.53	47002.83
535.2	538	6074.444	6092.341	6107.341	6079.324	6074.444	6130.117		288.2	291	5024.667	5044.451	5072.524	5035.452	5030.517	5091.393		868.2	871	39855.11	39971.11	39972.09	39978.03	39978.24	40081.06	39981.36	39968.36	39967.42	39967.13	40127.79		738.2	741	14029.78	14034.18	14030.81	14032.65	14030.77	14030.29	14030.08	14030.32	14030.49	14029.78	14041.14		968.2	971	47032.4	47032.7
535.1	537.9	6090	6108.312	6123.943	6095.123	6090	6147.378		288.1	290.9	5120.667	5044.827	5080.002	5035.556	5030.42	5099.545		868.1	870.9	40095.56	39969.6	39970.59	39976.6	39976.84	40088.52	39980.2	39966.84	39965.89	39965.59	40135.93		738.1	740.9	14079.56	14084.01	14080.6	14082.45	14080.57	14080.07	14079.86	14080.1	14080.27	14079.56	14091.05		968.1	970.9	46829.07	46829.36
535	537.8	6068.889	6087.631	6103.936	6074.273	6068.889	6128.062		288	290.8	5171.333	5045.173	5089.591	5035.617	5030.269	5109.843		868	870.8	39912.44	39969	39970	39976.09	39976.37	40097.16	39979.96	39966.24	39965.27	39964.98	40145.26		738	740.8	14074.67	14079.17	14075.73	14077.58	14075.71	14075.18	14074.98	14075.22	14075.39	14074.67	14086.3		968	970.8	46634.4	46634.7
534.9	537.7	6134.444	6153.631	6170.647	6140.112	6134.444	6195.502		287.9	290.7	5131.333	5045.588	5102.39	5035.735	5030.16	5123.393		867.9	870.7	40024.89	39968.31	39969.32	39975.49	39975.79	40107.21	39979.63	39965.53	39964.56	39964.26	40156.02		737.9	740.7	14120.44	14125.01	14121.52	14123.38	14121.52	14120.97	14120.76	14121	14121.17	14120.44	14132.22		967.9	970.7	46480.93	46481.23
534.8	537.6	6031.111	6050.759	6068.528	6037.086	6031.111	6094.151		287.8	290.6	5162	5045.998	5118.8	5035.835	5030.019	5140.595		867.8	870.6	39828.44	39966.75	39967.77	39974.02	39974.36	40116.66	39978.47	39963.96	39962.99	39962.68	40166.2		737.8	740.6	14070.67	14075.28	14071.76	14073.62	14071.77	14071.19	14070.99	14071.23	14071.4	14070.67	14082.58		967.8	970.6	46271.07	46271.37
534.7	537.5	6067.778	6087.904	6106.476	6074.085	6067.778	6132.909		287.7	290.5	5164	5046.437	5140.621	5035.949	5029.875	5163.258		867.7	870.5	39995.11	39966.38	39967.41	39973.75	39974.12	40129.1	39978.51	39963.58	39962.6	39962.29	40179.4		737.7	740.5	14007.56	14012.23	14008.66	14010.53	14008.7	14008.09	14007.89	14008.12	14008.29	14007.56	14019.62		967.7	970.5	46243.33	46243.64
534.6	537.4	6241.111	6261.733	6281.153	6247.782	6241.111	6308.446		287.6	290.4	5146.667	5046.926	5168.151	5036.099	5029.75	5191.676		867.6	870.4	39783.11	39964.32	39965.36	39971.78	39972.19	40140.09	39976.87	39961.51	39960.52	39960.21	40191.17		737.6	740.4	13937.33	13942.06	13938.46	13940.33	13938.51	13937.87	13937.68	13937.91	13938.08	13937.33	13949.55		967.6	970.4	46131.47	46131.77
534.5	537.3	6101.111	6122.247	6142.572	6108.178	6101.111	6170.775		287.5	290.3	5249.333	5047.341	5204.031	5036.16	5029.514	5228.503		867.5	870.3	39796.44	39962.43	39963.48	39970	39970.43	40153.38	39975.43	39959.61	39958.62	39958.3	40205.26		737.5	740.3	13983.56	13988.34	13984.7	13986.57	13984.77	13984.1	13983.91	13984.14	13984.3	13983.56	13995.92		967.5	970.3	46067.47	46067.77
534.4	537.2	6223.333	6245.003	6266.294	6230.834	6223.333	6295.464		287.4	290.2	5331.333	5047.705	5247.968	5036.152	5029.19	5273.445		867.4	870.2	40187.11	39959.72	39960.79	39967.39	39967.87	40166.06	39973.19	39956.9	39955.89	39955.58	40218.78		737.4	740.2	14036	14040.84	14037.16	14039.03	14037.25	14036.54	14036.36	14036.59	14036.75	14036	14048.53		967.4	970.2	45941.33	45941.64
534.3	537.1	6078.889	6101.113	6123.426	6086.868	6078.889	6153.629		287.3	290.1	5402	5048.035	5303.303	5036.094	5028.79	5329.851		867.3	870.1	40032.44	39958.83	39959.9	39966.6	39967.11	40183.02	39972.78	39955.99	39954.98	39954.66	40236.59		737.3	740.1	13901.33	13906.24	13902.51	13904.39	13902.62	13901.88	13901.7	13901.92	13902.09	13901.33	13914.02		967.3	970.1	45856.27	45856.58
534.2	537	6042.222	6065.023	6088.434	6050.726	6042.222	6119.738		287.2	290	5400.667	5048.409	5369.067	5036.061	5028.391	5396.755		867.2	870	40340	39954.25	39955.34	39962.13	39962.68	40196.48	39968.72	39951.41	39950.39	39950.07	40250.94		737.2	740	13751.11	13756.08	13752.3	13754.18	13752.44	13751.67	13751.49	13751.71	13751.88	13751.11	13763.97		967.2	970	45695.73	45696.05
534.1	536.9	5952.222	5975.622	6000.204	5961.309	5952.222	6032.69		287.1	289.9	5480	5048.746	5447.752	5035.974	5027.907	5476.659		867.1	869.9	39979.11	39953.93	39955.03	39961.91	39962.5	40216.99	39968.93	39951.08	39950.05	39949.72	40272.37		737.1	739.9	13890.67	13895.69	13891.88	13893.76	13892.04	13891.23	13891.06	13891.27	13891.44	13890.67	13903.69		967.1	969.9	45604.13	45604.45
534	536.8	5961.111	5985.133	6010.962	5970.846	5961.111	6044.719		287	289.8	5599.333	5049.007	5537.466	5035.788	5027.293	5567.674		867	869.8	40243.56	39950.46	39951.56	39958.54	39959.17	40234.47	39966.01	39947.59	39946.55	39946.22	40290.81		737	739.8	13899.11	13904.2	13900.34	13902.23	13900.53	13899.68	13899.51	13899.72	13899.89	13899.11	13912.31		967	969.8	45544.53	45544.85
533.9	536.7	5973.333	5998.004	6025.18	5983.79	5973.333	6060.307		286.9	289.7	5706.667	5049.208	5638.65	5035.527	5026.565	5670.256		866.9	869.7	40255.56	39946.8	39947.91	39954.98	39955.66	40254.92	39962.94	39943.91	39942.86	39942.53	40312.25		736.9	739.7	13822.67	13827.82	13823.91	13825.8	13824.13	13823.24	13823.08	13823.28	13823.45	13822.67	13836.05		966.9	969.7	45488.67	45488.98
533.8	536.6	6170	6195.345	6223.96	6181.273	6170	6260.578		286.8	289.6	5824	5049.344	5748.32	5035.176	5025.709	5781.421		866.8	869.6	40438.67	39940.91	39942.03	39949.2	39949.92	40273.23	39957.68	39938.01	39936.95	39936.62	40331.59		736.8	739.6	13880	13885.22	13881.27	13883.16	13881.52	13880.57	13880.42	13880.62	13880.79	13880	13893.57		966.8	969.6	45372.13	45372.45
533.7	536.5	6066.667	6092.714	6122.869	6078.862	6066.667	6161.112		286.7	289.5	5953.333	5049.408	5863.893	5034.735	5024.714	5898.608		866.7	869.5	40341.33	39936.12	39937.24	39944.51	39945.28	40296.02	39953.53	39933.2	39932.13	39931.8	40355.45		736.7	739.5	13920	13925.29	13921.28	13923.18	13921.57	13920.58	13920.43	13920.63	13920.79	13920	13933.76		966.7	969.5	45423.07	45423.39
533.6	536.4	6171.111	6197.892	6229.717	6184.351	6171.111	6269.738		286.6	289.4	6001.333	5049.493	5981.196	5034.289	5023.666	6017.646		866.6	869.4	40300.89	39931.75	39932.88	39940.25	39941.06	40319.38	39949.84	39928.81	39927.74	39927.4	40379.92		736.6	739.4	13866.67	13872.02	13867.97	13869.87	13868.3	13867.25	13867.11	13867.3	13867.47	13866.67	13880.62		966.6	969.4	45297.73	45298.06
533.5	536.3	6168.889	6196.434	6230.048	6183.347	6168.889	6272.051		286.5	289.3	6086	5049.566	6095.077	5033.815	5022.526	6133.406		866.5	869.3	40532	39924.57	39925.71	39933.18	39934.05	40343.39	39943.4	39921.62	39920.53	39920.19	40405.1		736.5	739.3	13883.56	13888.98	13884.88	13886.78	13885.24	13884.15	13884.01	13884.2	13884.36	13883.56	13897.72		966.5	969.3	45229.33	45229.66
533.4	536.2	6134.444	6153.508	6189.054	6141.037	6125.165	6233.269		286.4	289.2	6235.333	5049.566	6200.12	5033.242	5021.225	6240.479		866.4	869.2	40536.44	39917.25	39918.4	39925.98	39926.89	40367.52	39936.84	39914.29	39913.19	39912.85	40430.44		736.4	739.2	13826.22	13831.72	13827.57	13829.47	13827.97	13826.82	13826.69	13826.87	13827.03	13826.22	13840.59		966.4	969.2	45180.67	45180.99
533.3	536.1	6072.222	6154.228	6191.873	6142.603	6125.052	6238.6		286.3	289.1	6202	5049.698	6290.924	5032.787	5019.958	6333.495		866.3	869.1	40680.44	39908.13	39909.28	39916.97	39917.94	40393.31	39928.54	39905.15	39904.05	39903.7	40457.48		736.3	739.1	13850.22	13855.79	13851.59	13853.49	13852.04	13850.82	13850.71	13850.88	13851.04	13850.22	13864.81		966.3	969.1	45075.2	45075.53
533.2	536	6150	6155.045	6194.948	6144.605	6124.999	6244.6		286.2	289	6342	5049.787	6361.565	5032.264	5018.539	6406.538		866.2	869	40714.22	39898.5	39899.66	39907.46	39908.48	40418.94	39919.78	39895.5	39894.39	39894.04	40484.43		736.2	739	13851.11	13856.76	13852.5	13854.4	13853	13851.72	13851.61	13851.77	13851.94	13851.11	13865.92		966.2	969	45181.6	45181.93
533.1	535.9	6145.556	6155.911	6198.278	6147.058	6124.955	6251.337		286.1	288.9	6368.667	5049.966	6409.005	5031.824	5017.09	6456.615		866.1	868.9	40801.33	39887.71	39888.88	39896.8	39897.87	40446.78	39909.91	39884.7	39883.58	39883.23	40513.65		736.1	738.9	13794.67	13800.39	13796.08	13797.98	13796.63	13795.28	13795.18	13795.33	13795.5	13794.67	13809.71		966.1	968.9	45089.73	45090.06
533	535.8	6105.556	6156.822	6201.87	6150.152	6124.914	6259.017		286	288.8	6500	5050.136	6428.105	5031.358	5015.499	6478.6		866	868.8	40524	39880.11	39881.28	39889.31	39890.45	40478.23	39903.27	39877.08	39875.95	39875.59	40546.54		736	738.8	13906.22	13912.02	13907.66	13909.56	13908.27	13906.84	13906.75	13906.9	13907.06	13906.22	13921.5		966	968.8	45102.53	45102.87
532.9	535.7	6202.222	6157.652	6205.604	6154.025	6124.748	6267.785		285.9	288.7	6482	5050.47	6420.508	5031.07	5013.926	6474.197		865.9	868.7	40588	39871.64	39872.83	39880.97	39882.17	40511.99	39895.87	39868.6	39867.46	39867.1	40581.84		735.9	738.7	13810.22	13816.1	13811.68	13813.58	13812.36	13810.85	13810.77	13810.9	13811.07	13810.22	13825.75		965.9	968.7	44989.87	44990.2
532.8	535.6	6252.222	6158.424	6209.579	6158.952	6124.475	6278.005		285.8	288.6	6478	5050.972	6383.082	5030.956	5012.355	6440.3		865.8	868.6	40625.33	39862.64	39863.83	39872.09	39873.35	40545.7	39887.98	39859.58	39858.43	39858.06	40617.16		735.8	738.6	13774.22	13780.18	13775.7	13777.61	13776.45	13774.85	13774.78	13774.91	13775.07	13774.22	13790.01		965.8	968.6	44958.93	44959.27
532.7	535.5	6348.889	6159.039	6213.69	6165.457	6123.994	6290.198		285.7	288.5	6548.667	5051.582	6321.934	5031.012	5010.706	6383.115		865.7	868.5	40701.33	39852.61	39853.82	39862.2	39863.53	40581.26	39879.16	39849.54	39848.38	39848.01	40654.4		735.7	738.5	13782.22	13788.26	13783.73	13785.63	13784.55	13782.86	13782.8	13782.92	13783.08	13782.22	13798.27		965.7	968.5	44824.53	44824.87
532.6	535.4	6371.111	6159.66	6218.126	6174.276	6123.465	6305.133		285.6	288.4	6294	5052.67	6237.03	5031.623	5009.33	6302.664		865.6	868.4	40979.11	39839.16	39840.38	39848.88	39850.27	40613.9	39867.03	39836.08	39834.91	39834.53	40688.87		735.6	738.4	13799.56	13805.68	13801.09	13802.99	13801.99	13800.2	13800.15	13800.26	13800.42	13799.56	13815.89		965.6	968.4	44958.53	44958.87
532.5	535.3	6384.444	6160.309	6223.035	6186.094	6122.906	6323.627		285.5	288.3	6256.667	5054.032	6136.749	5032.687	5007.991	6207.486		865.5	868.3	40870.22	39826.85	39828.07	39836.7	39838.16	40650.12	39856.13	39823.75	39822.57	39822.19	40727.01		735.5	738.3	13789.78	13795.99	13791.34	13793.24	13792.32	13790.43	13790.4	13790.49	13790.65	13789.78	13806.4		965.5	968.3	44907.6	44907.94
532.4	535.2	6317.778	6161.161	6228.563	6202.706	6122.488	6347.453		285.4	288.2	6176	5055.746	6023.586	5034.299	5006.738	6100.155		865.4	868.2	40897.78	39814.06	39815.29	39824.05	39825.58	40686.35	39844.85	39810.94	39809.75	39809.37	40765.28		735.4	738.2	13685.33	13691.63	13686.92	13688.82	13688	13685.99	13685.97	13686.05	13686.21	13685.33	13702.26		965.4	968.2	44698.13	44698.48
532.3	535.1	6402.222	6161.897	6234.477	6224.593	6121.889	6377.189		285.3	288.1	6016	5057.933	5905.265	5036.777	5005.655	5988.664		865.3	868.1	40930.22	39800.73	39801.97	39810.86	39812.47	40723.96	39833.22	39797.6	39796.4	39796.01	40805.11		735.3	738.1	13732.44	13738.83	13734.06	13735.95	13735.24	13733.11	13733.11	13733.17	13733.33	13732.44	13749.69		965.3	968.1	44800.8	44801.15
532.2	535	6536.667	6162.414	6240.818	6253.09	6121	6414.321		285.2	288	5937.333	5060.551	5786.302	5040.177	5004.655	5877.72		865.2	868	40857.33	39788.11	39789.36	39798.39	39800.07	40762.67	39822.42	39784.97	39783.75	39783.37	40846.17		735.2	738	13696.44	13702.92	13698.09	13699.98	13699.39	13697.11	13697.13	13697.18	13697.34	13696.44	13714.02		965.2	968	44746.27	44746.61
532.1	534.9	6436.667	6163.219	6248.088	6291.11	6120.324	6461.769		285.1	287.9	5711.333	5063.811	5671.197	5045.092	5003.897	5772.306		865.1	867.9	41015.11	39773.45	39774.72	39783.88	39785.65	40800.65	39809.71	39770.3	39769.08	39768.69	40886.65		735.1	737.9	13812	13818.57	13813.67	13815.56	13815.1	13812.68	13812.71	13812.74	13812.9	13812	13829.92		965.1	967.9	44592.53	44592.88
532	534.8	6493.333	6163.984	6256.154	6338.851	6119.525	6519.939		285	287.8	5572.667	5067.683	5564.334	5051.71	5003.287	5677.153		865	867.8	41044.89	39758.27	39759.56	39768.85	39770.7	40838.32	39796.76	39755.11	39753.87	39753.48	40927.1		735	737.8	13775.11	13781.77	13776.81	13778.7	13778.38	13775.79	13775.85	13775.86	13776.02	13775.11	13793.41		965	967.8	44829.6	44829.95
531.9	534.7	6704.444	6164.384	6264.863	6397.745	6118.272	6590.447		284.9	287.7	5475.333	5072.2	5467.098	5060.753	5002.78	5594.491		864.9	867.7	41057.33	39742.76	39744.06	39753.5	39755.42	40876.29	39783.65	39739.58	39738.34	39737.94	40968.04		734.9	737.7	13770.22	13776.98	13771.95	13773.83	13773.68	13770.91	13770.98	13770.98	13771.14	13770.22	13788.91		964.9	967.7	44684	44684.35
531.8	534.6	6712.222	6164.858	6274.735	6469.336	6117	6674.929		284.8	287.6	5402	5077.439	5382.062	5072.697	5002.352	5527.494		864.8	867.6	40916	39728.75	39730.06	39739.64	39741.66	40915.72	39772.23	39725.56	39724.3	39723.9	41010.64		734.8	737.6	13762.67	13769.53	13764.43	13766.3	13766.34	13763.36	13763.46	13763.43	13763.59	13762.67	13781.77		964.8	967.6	44468	44468.36
531.7	534.5	6823.333	6165.193	6286.042	6552.288	6115.487	6772.55		284.7	287.5	5401.333	5083.441	5308.714	5088.719	5001.924	5477.026		864.7	867.5	40968.89	39713.94	39715.26	39724.99	39727.1	40954.25	39760.43	39710.74	39709.47	39709.06	41052.77		734.7	737.5	13750.67	13757.63	13752.46	13754.33	13754.57	13751.37	13751.49	13751.44	13751.6	13750.67	13770.22		964.7	967.5	44610.67	44611.02
531.6	534.4	6970	6165.321	6299.01	6646.299	6113.656	6883.318		284.6	287.4	5412	5090.34	5247.445	5109.568	5001.484	5444.386		864.6	867.4	41060	39697.87	39699.2	39709.09	39711.29	40991.14	39747.65	39694.65	39693.37	39692.96	41093.54		734.6	737.4	13711.11	13718.18	13712.94	13714.8	13715.28	13711.82	13711.96	13711.9	13712.05	13711.11	13731.14		964.6	967.4	44549.6	44549.96
531.5	534.3	6882.222	6165.751	6314.493	6748.782	6112.01	7005.007		284.5	287.3	5429.333	5098.323	5197.034	5137.062	5001.025	5430.369		864.5	867.3	41101.33	39681.11	39682.46	39692.5	39694.8	41026.5	39734.46	39677.88	39676.59	39676.17	41133.08		734.5	737.3	13672.44	13679.62	13674.3	13676.16	13676.9	13673.16	13673.33	13673.24	13673.39	13672.44	13693		964.5	967.3	44576.53	44576.9
531.4	534.2	7068.889	6165.905	6333.017	6855.214	6109.96	7134.217		284.4	287.2	5514	5107.572	5156.289	5172.056	5000.474	5434.968		864.4	867.2	41126.22	39663.86	39665.22	39675.41	39677.81	41060.56	39721.38	39660.62	39659.31	39658.89	41171.93		734.4	737.2	13716	13723.28	13717.89	13719.75	13720.79	13716.72	13716.92	13716.8	13716.95	13716	13737.12		964.4	967.2	44575.33	44575.7
531.3	534.1	7248.889	6165.809	6354.905	6960.536	6107.52	7266.211		284.3	287.1	5523.333	5118.512	5124.042	5216.858	4999.913	5459.585		864.3	867.1	41466.67	39642.34	39643.72	39654.07	39656.58	41088.78	39704.5	39639.09	39637.77	39637.35	41205.41		734.3	737.1	13775.56	13782.95	13777.49	13779.33	13780.73	13776.29	13776.52	13776.37	13776.52	13775.56	13797.29		964.3	967.1	44538	44538.37
531.2	534	7496.667	6165.332	6381.148	7058.433	6104.544	7395.825		284.2	287	5548.667	5131.621	5098.565	5272.2	4999.325	5503.736		864.2	867	41123.56	39624.66	39626.05	39636.57	39639.18	41119.52	39691.86	39621.39	39620.07	39619.64	41241.85		734.2	737	13668.44	13675.95	13670.41	13672.25	13674.05	13669.18	13669.44	13669.27	13669.42	13668.44	13690.86		964.2	967	44558.93	44559.3
531.1	533.9	7445.556	6165.124	6414.95	7144.014	6101.671	7520.746		284.1	286.9	5701.333	5147.524	5078.779	5339.989	4998.571	5569.149		864.1	866.9	41463.11	39602.71	39604.13	39614.81	39617.53	41143.75	39675.85	39599.44	39598.1	39597.67	41272.66		734.1	736.9	13697.78	13705.4	13699.78	13701.61	13703.9	13698.53	13698.82	13698.61	13698.76	13697.78	13720.96		964.1	966.9	44475.6	44475.97
531	533.8	7582.222	6164.798	6456.832	7208.463	6098.5	7633.094		284	286.8	5692.667	5167.651	5063.24	5420.315	4997.827	5655.553		864	866.8	41350.22	39581.86	39583.29	39594.14	39596.98	41167.2	39661.63	39578.57	39577.22	39576.78	41303.42		734	736.8	13617.33	13625.07	13619.38	13621.19	13624.05	13618.09	13618.42	13618.17	13618.32	13617.33	13641.37		964	966.8	44418.93	44419.31
530.9	533.7	7707.778	6164.393	6510.185	7249.271	6095.052	7733.745		283.9	286.7	5895.333	5193.462	5051.138	5513.823	4996.864	5764.695		863.9	866.7	40984.89	39565.1	39566.55	39577.57	39580.54	41191.89	39652.16	39561.81	39560.44	39560	41336.08		733.9	736.7	13745.78	13698.44	13692.66	13694.47	13697.99	13691.34	13691.72	13691.43	13691.58	13690.58	13715.58		963.9	966.7	44349.47	44349.84
530.8	533.6	7815.556	6163.966	6579.639	7262.452	6091.366	7823.323		283.8	286.6	5952.667	5227.71	5041.407	5618.952	4995.838	5896.393		863.8	866.6	41210.67	39545.46	39546.92	39558.12	39561.21	41211.24	39641.03	39542.15	39540.77	39540.33	41364.63		733.8	736.6	13710.22	13698.38	13692.52	13694.31	13698.63	13691.16	13691.58	13691.25	13691.39	13690.39	13716.49		963.8	966.6	44310.27	44310.65
530.7	533.5	7986.667	6163.401	6667.438	7244.835	6087.306	7901.062		283.7	286.5	6019.333	5274.732	5033.735	5734.324	4994.74	6053.311		863.7	866.5	41410.67	39523.2	39524.68	39536.06	39539.28	41224.59	39628.39	39519.88	39518.49	39518.04	41388.31		733.7	736.5	13672	13698.33	13692.38	13694.16	13699.43	13690.99	13691.46	13691.08	13691.23	13690.21	13717.58		963.7	966.5	44216.27	44216.65
530.6	533.4	7881.111	6163.315	6782.435	7200.777	6083.464	7979.6		283.6	286.4	6114.667	5341.192	5027.287	5856.065	4993.538	6237.468		863.6	866.4	41423.11	39500.52	39502.02	39513.59	39516.95	41234.48	39616.27	39497.19	39495.79	39495.33	41409.48		733.6	736.4	13665.78	13698.23	13692.19	13693.96	13700.37	13690.77	13691.29	13690.86	13691	13689.98	13718.81		963.6	966.4	44283.6	44283.98
530.5	533.3	8096.667	6163.046	6930.321	7130.744	6079.151	8065.809		283.5	286.3	6464	5436.842	5021.662	5979.812	4991.96	6454.396		863.5	866.3	41321.33	39478.78	39480.31	39492.06	39495.56	41241.55	39606.77	39475.45	39474.03	39473.57	41429.53		733.5	736.3	13858.67	13696.72	13690.6	13692.35	13700.12	13689.14	13689.72	13689.23	13689.37	13688.34	13718.86		963.5	966.3	44289.47	44289.85
530.4	533.2	8258.889	6162.747	7115.786	7040.145	6074.481	8169.715		283.4	286.2	6663.333	5577.302	5016.54	6100.094	4990.167	6713.602		863.4	866.2	41416	39455.66	39457.2	39469.15	39472.8	41243.62	39597.55	39452.32	39450.88	39450.42	41446.25		733.4	736.2	13883.11	13694.96	13688.75	13690.49	13699.89	13687.25	13687.89	13687.35	13687.49	13686.45	13718.95		963.4	966.2	44178.53	44178.92
530.3	533.1	8250	6162.813	7355.626	6936.128	6069.821	8314.924		283.3	286.1	6874	5781.988	5011.85	6210.808	4988.146	7028.354		863.3	866.1	41352.89	39433.02	39434.58	39446.73	39450.52	41242.17	39590.13	39429.67	39428.22	39427.75	41460.79		733.3	736.1	13793.33	13694.07	13687.76	13689.48	13700.83	13686.22	13686.93	13686.32	13686.46	13685.41	13720.22		963.3	966.1	44143.47	44143.86
530.2	533	8627.778	6162.456	7652.951	6823.199	6064.341	8509.923		283.2	286	7301.333	6075.773	5007.107	6305.713	4985.664	7417.266		863.2	866	41392.44	39409.63	39411.21	39423.56	39427.52	41235.83	39584.18	39406.27	39404.81	39404.33	41472.69		733.2	736	13745.78	13693.62	13687.22	13688.92	13702.6	13685.64	13686.43	13685.75	13685.88	13684.82	13722.33		963.2	966	44232.4	44232.79
530.1	532.9	8807.778	6162.142	8014.585	6708.66	6058.464	8768.458		283.1	285.9	7981.333	6487.311	5002.02	6378.421	4982.45	7902.852		863.1	865.9	41486.67	39384.84	39386.44	39399	39403.12	41224	39579.2	39381.47	39380	39379.52	41481.47		733.1	735.9	13737.33	13693.26	13686.77	13688.45	13704.89	13685.14	13686	13685.25	13685.38	13684.31	13724.97		963.1	965.9	44291.33	44291.73
530	532.8	9134.444	6161.609	8463.996	6596.894	6051.875	9118.75		283	285.8	8559.333	7045.893	4996.57	6424.72	4978.612	8509.959		863	865.8	41469.33	39359.98	39361.59	39374.35	39378.64	41207.51	39575.92	39356.59	39355.1	39354.61	41487.42		733	735.8	13725.78	13693.01	13686.42	13688.07	13707.8	13684.75	13685.7	13684.85	13684.98	13683.91	13728.24		963	965.8	44238.93	44239.33
529.9	532.7	9573.333	6160.677	8993.039	6492.756	6044.331	9557.81		282.9	285.7	9334	7774.841	4990.513	6440.669	4973.938	9258.146		862.9	865.7	41408.44	39335.54	39337.16	39350.14	39354.61	41187.41	39575.86	39332.13	39330.63	39330.13	41492.56		732.9	735.7	13609.33	13692.46	13685.76	13687.4	13710.98	13684.05	13685.1	13684.16	13684.28	13683.19	13731.8		962.9	965.7	44073.6	44074
529.8	532.6	10132.22	6159.158	9609.452	6397.761	6035.574	10095.22		282.8	285.6	10231.33	8683.982	4983.652	6425.246	4968.297	10156.29		862.8	865.6	41292.89	39312.19	39313.82	39327.02	39331.67	41163.52	39580.1	39308.76	39307.24	39306.74	41497.14		732.8	735.6	13670.67	13692.5	13685.7	13687.31	13715.4	13683.94	13685.09	13684.05	13684.17	13683.08	13736.63		962.8	965.6	44013.33	44013.74
529.7	532.5	10727.78	6157.054	10322.89	6313.236	6025.522	10742.14		282.7	285.5	11239.33	9761.012	4975.849	6378.549	4961.569	11192.27		862.7	865.5	41252.44	39289.04	39290.68	39304.11	39308.95	41135.96	39586.84	39285.59	39284.06	39283.55	41500.37		732.7	735.5	13827.11	13691.26	13684.35	13685.94	13719.28	13682.54	13683.82	13682.66	13682.78	13681.67	13740.92		962.7	965.5	43972.53	43972.94
529.6	532.4	11370	6154.384	11114.99	6240.436	6014.073	11481.66		282.6	285.4	12364	10964.51	4966.947	6303.43	4953.626	12327.64		862.6	865.4	41368	39264.24	39265.89	39279.55	39284.59	41101.71	39595.22	39260.77	39259.22	39258.71	41500.23		732.6	735.4	13758.67	13690.68	13683.67	13685.23	13724.6	13681.81	13683.22	13681.92	13682.04	13680.93	13746.69		962.6	965.4	43990.27	43990.67
529.5	532.3	12225.56	6150.789	11981.31	6176.9	6000.767	12307.47		282.5	285.3	13397.33	12221.59	4957.027	6203.965	4944.566	13493.45		862.5	865.3	41626.22	39236.07	39237.73	39251.63	39256.87	41060.51	39604.33	39232.58	39231.01	39230.49	41497.27		732.5	735.3	13656.44	13690.62	13683.5	13685.03	13731.3	13681.58	13683.14	13681.7	13681.82	13680.69	13753.85		962.5	965.3	44006.8	44007.21
529.4	532.2	12998.89	6146.581	12904.03	6122.256	5985.775	13201.32		282.4	285.2	14627.33	13431.44	4945.864	6085.647	4934.177	14594.6		862.4	865.2	41552	39208.44	39210.11	39224.25	39229.72	41014.82	39616.75	39204.93	39203.35	39202.83	41492.59		732.4	735.2	13662.22	13690.62	13683.39	13684.89	13738.98	13681.42	13683.14	13681.54	13681.65	13680.52	13762.01		962.4	965.2	44067.47	44067.88
529.3	532.1	13911.11	6141.626	13853.72	6074.834	5968.797	14132.59		282.3	285.1	15498	14477.98	4933.828	5954.792	4922.842	15520.92		862.3	865.1	41372.44	39182.63	39184.31	39198.7	39204.38	40967.74	39634.62	39179.1	39177.49	39176.97	41490.18		732.3	735.1	13815.11	13689.5	13682.14	13683.62	13746.46	13680.12	13682.03	13680.24	13680.36	13679.21	13770.01		962.3	965.1	44115.33	44115.75
529.2	532	15034.44	6135.672	14800.11	6031.955	5949.377	15068.98		282.2	285	16155.33	15246.98	4921.139	5817.986	4910.79	16164.53		862.2	865	41441.78	39155.67	39157.37	39172.01	39177.93	40914.66	39656.22	39152.13	39150.51	39149.98	41486.66		732.2	735	13645.78	13689.37	13681.9	13683.33	13755.89	13679.81	13681.93	13679.94	13680.05	13678.89	13779.99		962.2	965	43788.8	43789.22
529.1	531.9	15982.22	6129.341	15706.78	5993.047	5927.884	15973.4		282.1	284.9	16459.33	15645.05	4908.166	5681.134	4898.399	16437.55		862.1	864.9	41537.33	39127.26	39128.98	39143.87	39150.04	40857.37	39679.38	39123.7	39122.06	39121.53	41481.98		732.1	734.9	13840.44	13687.99	13680.4	13681.8	13765.02	13678.25	13680.61	13678.38	13678.49	13677.32	13789.71		962.1	964.9	43887.73	43888.15
529	531.8	16884.44	6123.037	16541.56	5956.599	5904.413	16812.37		282	284.8	16175.33	15618.22	4895.536	5549.951	4886.299	16291.11		862	864.8	41493.33	39099.04	39100.77	39115.93	39122.35	40795.74	39706.44	39095.45	39093.8	39093.26	41476.69		732	734.8	13772.89	13687.26	13679.54	13680.91	13775.69	13677.33	13679.97	13677.47	13677.57	13676.39	13801.01		962	964.8	43774.27	43774.69
528.9	531.7	17512.22	6117.733	17247.56	5921.968	5879.546	17528.17		281.9	284.7	15726	15173.88	4883.416	5428.045	4874.668	15736.01		861.9	864.7	41514.67	39070.22	39071.96	39087.4	39094.08	40731.23	39738.14	39066.62	39064.95	39064.4	41473.79		731.9	734.7	13837.33	13685.9	13678.06	13679.38	13786.54	13675.78	13678.73	13675.92	13676.02	13674.82	13812.55		961.9	964.7	43713.2	43713.62
528.8	531.6	18198.89	6113.892	17806.84	5888.436	5853.155	18102.86		281.8	284.6	14833.33	14365.94	4872.283	5318.737	4863.983	14829		861.8	864.6	41691.11	39038.96	39040.72	39056.43	39063.39	40660.25	39770.38	39035.34	39033.65	39033.1	41467.42		731.8	734.6	13814.67	13684.75	13676.78	13678.06	13798.3	13674.43	13677.76	13674.57	13674.67	13673.46	13825.06		961.8	964.6	43723.87	43724.29
528.7	531.5	18803.33	6112.285	18192.76	5855.264	5825.413	18509.48		281.7	284.5	13743.33	13287.91	4862.34	5223.151	4854.455	13664.49		861.7	864.5	41697.33	39007.25	39009.02	39025.02	39032.26	40587.03	39805.53	39003.61	39001.91	39001.35	41462.21		731.7	734.5	13862.22	13683.13	13675.03	13676.26	13810.15	13672.6	13676.39	13672.75	13672.84	13671.63	13837.74		961.7	964.5	43696.4	43696.83
528.6	531.4	19064.44	6114.525	18354.33	5822.718	5797.052	18697.47		281.6	284.4	12351.33	12055	4853.914	5142.338	4846.412	12358.43		861.6	864.4	41592.44	38976.41	38978.2	38994.49	39002.03	40511.27	39846.5	38972.76	38971.03	38970.47	41459.42		731.6	734.4	13872.44	13681.4	13673.16	13674.34	13822.23	13670.66	13674.99	13670.81	13670.9	13669.68	13850.78		961.6	964.4	43917.73	43918.16
528.5	531.3	18845.56	6122.877	18317.13	5791.566	5769.1	18693.38		281.5	284.3	11090.67	10783.07	4846.858	5075.167	4839.712	11025.67		861.5	864.3	41574.22	38945.42	38947.23	38963.81	38971.67	40434.04	39889.79	38941.75	38940.01	38939.43	41457.68		731.5	734.3	13924.89	13679.15	13670.77	13671.9	13833.93	13668.19	13673.19	13668.35	13668.43	13667.19	13863.55		961.5	964.3	43694.27	43694.7
528.4	531.2	18507.78	6139.436	18068.66	5761.696	5741.81	18486.17		281.4	284.2	9817.333	9571.545	4841.189	5021.023	4834.371	9765.015		861.4	864.2	41540.44	38914.46	38916.29	38933.18	38941.37	40354.17	39935.69	38910.78	38909.02	38908.44	41455.9		731.4	734.2	13930.67	13676.82	13668.3	13669.38	13845.43	13665.64	13671.49	13665.8	13665.88	13664.63	13876.33		961.4	964.2	43649.47	43649.9
528.3	531.1	18171.11	6167.238	17607.89	5732.969	5715.184	18077.73		281.3	284.1	8808	8491.612	4836.617	4977.754	4830.107	8645.769		861.3	864.1	41541.78	38883.12	38884.96	38902.17	38910.7	40273.03	39984.9	38879.42	38877.64	38877.05	41456.57		731.3	734.1	13856.44	13675.2	13666.54	13667.55	13857.23	13663.79	13670.74	13663.95	13664.03	13662.77	13889.66		961.3	964.1	43751.73	43752.17
528.2	531	17416.67	6211.759	16982.76	5706.186	5690.117	17520.47		281.2	284	7715.333	7583.116	4833.236	4944.304	4827.011	7706.632		861.2	864	41404.44	38853.04	38854.9	38872.43	38881.32	40191.3	40036.8	38849.33	38847.53	38846.93	41458.12		731.2	734	13826.67	13673.86	13665.05	13666	13868.61	13662.21	13670.58	13662.38	13662.45	13661.17	13902.91		961.2	964	43635.33	43635.78
528.1	530.9	16684.44	6279.241	16206.02	5681.184	5666.565	16833.32		281.1	283.9	6882.667	6856.679	4830.762	4918.493	4824.806	6956.323		861.1	863.9	41494.22	38821.45	38823.41	38841.27	38850.54	40107.6	40088.66	38817.8	38815.99	38815.38	41459.05		731.1	733.9	13954.22	13671.27	13662.3	13663.19	13877.76	13659.37	13669.67	13659.54	13659.61	13658.32	13914.45		961.1	963.9	43501.73	43502.18
528	530.8	15667.78	6382.379	15318.8	5658.526	5645.14	16069.43		281	283.8	6267.333	6301.216	4828.965	4899.001	4823.258	6382.665		861	863.8	41740.89	38786.62	38788.61	38806.81	38816.46	40019.61	40138.53	38782.96	38781.13	38780.52	41457.12		731	733.8	13949.33	13668.71	13659.59	13660.4	13885.65	13656.56	13669.45	13656.73	13656.79	13655.5	13925.42		961	963.8	43456.53	43456.98
527.9	530.7	14830	6537.955	14365.93	5637.783	5625.464	15290.74		280.9	283.7	5864.667	5892.482	4827.612	4884.107	4822.14	5959.92		860.9	863.7	41420.44	38755.2	38757.21	38775.76	38785.82	39934.77	40191.69	38751.53	38749.67	38749.05	41458.27		730.9	733.7	13796	13667.62	13658.34	13659.08	13893.47	13655.21	13671.56	13655.38	13655.44	13654.13	13937.19		960.9	963.7	43606.4	43606.85
527.8	530.6	14166.67	6772.65	13378.94	5618.546	5607.167	14555.8		280.8	283.6	5526	5601.083	4826.637	4872.948	4821.385	5657.898		860.8	863.6	41652.89	38720.63	38722.67	38741.57	38752.06	39846.68	40241.51	38716.95	38715.07	38714.45	41456.01		730.8	733.6	14013.78	13664.4	13654.96	13655.63	13897.37	13651.72	13672.85	13651.91	13651.96	13650.63	13946.37		960.8	963.6	43503.07	43503.52
527.7	530.5	13754.44	7125.636	12396.61	5600.269	5589.713	13943.09		280.7	283.5	5339.333	5398.633	4825.875	4864.367	4820.83	5447.215		860.7	863.5	41584.89	38686.47	38688.52	38707.79	38718.72	39758.96	40289.87	38682.77	38680.87	38680.24	41452.32		730.7	733.5	14044	13660.87	13651.26	13651.84	13898.96	13647.91	13675.41	13648.1	13648.15	13646.81	13954.86		960.7	963.5	43574.53	43574.99
527.6	530.4	13422.22	7651.973	11445.71	5582.755	5572.934	13534.57		280.6	283.4	5088.667	5259.655	4825.393	4857.943	4820.542	5301.906		860.6	863.4	41500.44	38652.9	38654.98	38674.62	38686.02	39672.57	40336.7	38649.19	38647.27	38646.63	41447.85		730.6	733.4	14159.11	13656.2	13646.41	13646.91	13897.27	13642.94	13678.78	13643.14	13643.18	13641.83	13962.04		960.6	963.4	43572.27	43572.73
527.5	530.3	13612.22	8422.216	10560.2	5564.874	5555.712	13435.86		280.5	283.3	4983.333	5163.977	4825.035	4852.929	4820.367	5201.206		860.5	863.3	41356.89	38620.64	38622.74	38642.77	38654.66	39587.6	40382.7	38616.92	38614.98	38614.33	41442.73		730.5	733.3	13994.67	13653.08	13643.12	13643.52	13894.89	13639.53	13686.36	13639.73	13639.76	13638.4	13971.22		960.5	963.3	43465.2	43465.67
527.4	530.2	14111.11	9520.808	9745.413	5545.959	5537.385	13737.41		280.4	283.2	4960.667	5097.323	4824.711	4848.97	4820.217	5130.571		860.4	863.2	41516	38586.1	38588.23	38608.65	38621.05	39501.86	40421.28	38582.37	38580.4	38579.75	41431.73		730.4	733.2	14004.89	13649.84	13639.7	13640	13890.13	13635.98	13696.74	13636.18	13636.21	13634.83	13980.97		960.4	963.2	43398.4	43398.87
527.3	530.1	15211.11	11037.88	9012.489	5524.703	5516.662	14541.74		280.3	283.1	4951.333	5049.834	4824.407	4845.722	4820.076	5079.81		860.3	863.1	41497.33	38551.38	38553.52	38574.35	38587.3	39416.12	40455.11	38547.63	38545.64	38544.97	41416.24		730.3	733.1	14017.33	13646.45	13636.14	13636.33	13882.97	13632.27	13710.15	13632.48	13632.51	13631.11	13991.52		960.3	963.1	43431.73	43432.21
527.2	530	16546.67	13061.33	8375.715	5500.59	5493.033	15951.57		280.2	283	4880.667	5015.01	4824.187	4843.118	4820.011	5042.293		860.2	863	41354.22	38517.94	38520.11	38541.36	38554.87	39333.87	40486.12	38514.18	38512.17	38511.49	41400.15		730.2	733	13923.11	13643.96	13633.46	13633.54	13874.53	13629.45	13728.15	13629.66	13629.68	13628.27	14004.52		960.2	963	43425.47	43425.94
527.1	529.9	18400	15616.83	7819.115	5472.503	5465.383	17977.68		280.1	282.9	4918.667	4988.481	4823.935	4840.875	4819.905	5013.48		860.1	862.9	41261.33	38485.21	38487.41	38509.09	38523.18	39252.54	40509.79	38481.44	38479.41	38478.72	41377.01		730.1	732.9	14141.78	13639.33	13628.63	13628.59	13861.96	13624.47	13747.37	13624.69	13624.7	13623.28	14016.79		960.1	962.9	43358.4	43358.88
527	529.8	20954.44	18674.43	7343.73	5438.921	5432.202	20592.68		280	282.8	4902	4967.778	4823.708	4839	4819.817	4990.851		860	862.8	41273.33	38451.95	38454.17	38476.29	38491.01	39173.44	40525.94	38448.17	38446.11	38445.42	41349.17		730	732.8	14143.56	13634.64	13623.75	13623.58	13847.57	13619.43	13769.44	13619.66	13619.66	13618.22	14030.17		960	962.8	43364	43364.48
526.9	529.7	23838.89	22116.89	6943.207	5399.122	5392.771	23673.68		279.9	282.7	4824	4951.298	4823.572	4837.449	4819.813	4972.694		859.9	862.7	41188.44	38419.31	38421.55	38444.12	38459.5	39095.15	40536.89	38415.51	38413.43	38412.73	41316.37		729.9	732.7	14013.33	13631.18	13620.09	13619.78	13832.87	13615.6	13795.06	13615.84	13615.83	13614.38	14045.61		959.9	962.7	43410.93	43411.42
526.8	529.6	26418.89	25730.64	6600.934	5353.744	5347.728	26989.86		279.8	282.6	4900	4937.647	4823.361	4836.027	4819.727	4957.582		859.8	862.6	41207.11	38386.05	38388.32	38411.36	38427.42	39019.48	40537.19	38382.24	38380.14	38379.42	41276.23		729.8	732.6	13946.67	13628.35	13617.06	13616.6	13817.54	13612.39	13822.22	13612.63	13612.62	13611.15	14061.36		959.8	962.6	43420.67	43421.16
526.7	529.5	29753.33	29213.63	6313.427	5301.151	5295.446	30237.32		279.7	282.5	4890.667	4926.17	4823.167	4834.767	4819.651	4944.803		859.7	862.5	40989.78	38354.99	38357.28	38380.8	38397.58	38946.12	40530.71	38351.17	38349.04	38348.31	41229.48		729.7	732.5	14112.89	13623.89	13612.39	13611.77	13799.6	13607.53	13847.21	13607.77	13607.75	13606.27	14074.02		959.7	962.5	43355.33	43355.83
526.6	529.4	32570	32215.91	6068.607	5242.437	5237.018	33052.91		279.6	282.4	4790	4916.42	4823.022	4833.692	4819.619	4933.896		859.6	862.4	41036.44	38323	38325.32	38349.33	38366.87	38875.4	40516.4	38319.16	38317.01	38316.28	41178.54		729.6	732.4	14001.78	13620.47	13608.76	13607.98	13782.03	13603.7	13870.79	13603.95	13603.92	13602.42	14084.64		959.6	962.4	43330	43330.5
526.5	529.3	34685.56	34385.98	5856.523	5179.087	5173.933	35073.73		279.5	282.3	4878.667	4907.979	4822.851	4832.691	4819.556	4924.41		859.5	862.3	41034.67	38290.65	38293	38317.51	38335.85	38804.43	40490.92	38286.8	38284.62	38283.88	41116.62		729.5	732.3	13996	13617.09	13605.16	13604.2	13764.12	13599.89	13890.14	13600.15	13600.11	13598.6	14090.67		959.5	962.3	43280.13	43280.63
526.4	529.2	36060	35426.86	5676.496	5112.676	5107.768	36000.49		279.4	282.2	4790	4871.138	4793.193	4802.299	4790	4886.63		859.4	862.2	41044.44	38257.8	38260.17	38285.2	38304.4	38736.59	40454.86	38253.94	38251.73	38250.98	41047.84		729.4	732.2	14054.22	13613.12	13600.97	13599.82	13745.51	13595.48	13903.21	13595.74	13595.7	13594.17	14090.38		959.4	962.2	43328.13	43328.64
526.3	529.1	35782.22	35221.4	5520.814	5046.737	5042.056	35704.84		279.3	282.1	4801.333	4876.097	4804.429	4812.872	4801.333	4890.731		859.3	862.1	40914.22	38226.1	38228.51	38254.07	38274.16	38670.09	40412.82	38222.24	38220	38219.24	40973.32		729.3	732.1	14058.22	13609.09	13596.72	13595.36	13726.98	13590.99	13908.64	13591.26	13591.2	13589.66	14082.64		959.3	962.1	43337.73	43338.24
526.2	529	34651.11	33791.69	5386.048	4983.096	4978.627	34203.58		279.2	282	4767.333	4836.473	4770.335	4778.188	4767.333	4850.329		859.2	862	40880.44	38194.44	38196.87	38222.99	38244.01	38607.15	40360.54	38190.56	38188.3	38187.52	40892.19		729.2	732	13948	13606.11	13593.51	13591.93	13709.85	13587.52	13907.03	13587.8	13587.73	13586.17	14068.28		959.2	962	43155.6	43156.11
526.1	528.9	32215.56	31315.35	5272.995	4924.55	4920.28	31672.33		279.1	281.9	4813.333	4877.479	4816.246	4823.561	4813.333	4890.62		859.1	861.9	40508.89	38166.82	38169.28	38195.97	38217.99	38548.53	40302.3	38162.93	38160.64	38159.86	40805.45		729.1	731.9	14024.89	13602.36	13589.53	13587.72	13692.52	13583.27	13896.73	13583.56	13583.49	13581.91	14045.84		959.1	961.9	43140.93	43141.44
526	528.8	28678.89	28086.97	5177.904	4873.47	4869.384	28399.58		279	281.8	4870.667	4930.356	4873.494	4880.326	4870.667	4942.843		859	861.8	40699.56	38136.6	38139.09	38166.36	38189.43	38490.65	40234.95	38132.7	38130.39	38129.59	40713.05		729	731.8	13883.11	13599.98	13586.91	13584.84	13677.24	13580.36	13879.7	13580.66	13580.57	13578.98	14017.42		959	961.8	43197.33	43197.85
525.9	528.7	24756.67	24458.32	5099.718	4830.694	4826.781	24735.17		278.9	281.7	4786.667	4842.36	4789.413	4795.803	4786.667	4854.242		858.9	861.7	40559.56	38107.7	38110.21	38138.09	38162.26	38434.43	40160.32	38103.78	38101.44	38100.63	40613.81		728.9	731.7	13902.22	13597.39	13584.09	13581.76	13662.57	13577.24	13855.9	13577.54	13577.45	13575.83	13983.1		958.9	961.7	43106.13	43106.65
525.8	528.6	21093.33	20774.63	5036.3	4795.686	4791.934	21022.75		278.8	281.6	4759.333	4811.427	4762.002	4767.991	4759.333	4822.754		858.8	861.6	40499.56	38079.16	38081.7	38110.2	38135.55	38381.66	40077.36	38075.23	38072.86	38072.04	40509.43		728.8	731.6	13916	13594.68	13581.13	13578.5	13648.65	13573.95	13827.03	13574.27	13574.16	13572.53	13944.69		958.8	961.6	43172.13	43172.65
525.7	528.5	17461.11	17327.09	4985.213	4768.394	4764.794	17551.11		278.7	281.5	4828.667	4877.507	4831.261	4836.882	4828.667	4888.316		858.7	861.5	40328.44	38052.32	38054.89	38084.03	38110.62	38331	39991	38048.38	38045.98	38045.15	40402.18		728.7	731.5	13756.44	13593.5	13579.72	13576.77	13637.2	13572.19	13796.26	13572.51	13572.39	13570.74	13905.36		958.7	961.5	43226	43226.52
525.6	528.4	14290	14320.21	4944.813	4747.846	4744.389	14524.1		278.6	281.4	4838.667	4884.555	4841.189	4846.475	4838.667	4894.886		858.6	861.4	40359.11	38024.79	38027.4	38057.19	38085.1	38282.44	39897.75	38020.85	38018.41	38017.57	40290.94		728.6	731.4	13792	13591.99	13577.96	13574.68	13626.34	13570.06	13763.77	13570.39	13570.26	13568.59	13865.33		958.6	961.4	43256.67	43257.19
525.5	528.3	11771.11	11840.75	4912.86	4732.659	4729.336	12027.6		278.5	281.3	4856.667	4899.868	4859.12	4864.097	4856.667	4909.752		858.5	861.3	40040.89	38000.73	38003.37	38033.84	38063.15	38237.81	39801.62	37996.78	37994.31	37993.46	40177.4		728.5	731.3	14010.22	13588.36	13574.1	13570.44	13614.28	13565.78	13729.39	13566.12	13565.98	13564.29	13824.41		958.5	961.3	42977.33	42977.86
525.4	528.2	9662.222	9897.572	4887.689	4721.965	4718.769	10069.69		278.4	281.2	4800	4840.747	4802.388	4807.081	4800	4850.216		858.4	861.2	40085.78	37975.85	37978.52	38009.7	38040.48	38194.82	39701.45	37971.89	37969.39	37968.52	40062.43		728.4	731.2	14033.33	13584.49	13569.99	13565.94	13602.86	13561.25	13696.45	13561.59	13561.44	13559.73	13785.9		958.4	961.2	43099.47	43100
525.3	528.1	8312.222	8440.342	4867.468	4714.147	4711.071	8599.816		278.3	281.1	4822.667	4861.167	4824.992	4829.422	4822.667	4870.246		858.3	861.1	39927.56	37952.56	37955.26	37987.16	38019.52	38153.9	39599.29	37948.59	37946.06	37945.18	39946.1		728.3	731.1	13848	13582.42	13567.69	13563.2	13594.06	13558.47	13668	13558.82	13558.66	13556.93	13752.8		958.3	961.1	43129.47	43130
525.2	528	7165.556	7388.21	4851.182	4708.777	4705.813	7536.544		278.2	281	4758	4794.436	4760.264	4764.453	4758	4803.153		858.2	861	39973.78	37928.43	37931.17	37963.82	37997.85	38114.31	39492.96	37924.46	37921.89	37921	39827.9		728.2	731	13904.89	13579.8	13564.84	13559.88	13585.46	13555.11	13642.1	13555.48	13555.29	13553.55	13723.14		958.2	961	43016	43016.54
525.1	527.9	6466.667	6650.712	4837.55	4704.898	4702.04	6789.079		278.1	280.9	4844	4878.536	4846.206	4850.17	4844	4886.912		858.1	860.9	39799.11	37906.11	37908.87	37942.29	37978.11	38077	39387.21	37902.12	37899.52	37898.62	39710.93		728.1	730.9	13953.78	13576.71	13561.52	13556.05	13577.09	13551.24	13619.33	13551.62	13551.42	13549.65	13697.39		958.1	960.9	42908.93	42909.48
525	527.8	5958.889	6144.23	4826.159	4702.105	4699.348	6273.797		278	280.8	4920.667	4953.45	4922.817	4926.573	4920.667	4961.507		858	860.8	39921.78	37882.05	37884.85	37919.07	37956.79	38039.81	39278.58	37878.06	37875.43	37874.51	39593.1		728	730.8	13882.67	13574.31	13558.92	13552.87	13570.01	13548.02	13600.67	13548.42	13548.2	13546.42	13676.51		958	960.8	42904.4	42904.95
524.9	527.7	5552.222	5800.837	4816.455	4700.182	4697.521	5922.433		277.9	280.7	4829.333	4860.498	4831.429	4834.992	4829.333	4868.252		857.9	860.7	39626.67	37861.23	37864.06	37899.1	37938.84	38006.34	39172.98	37857.22	37854.56	37853.62	39478.97		727.9	730.7	13897.33	13571.77	13556.19	13549.52	13563.34	13544.64	13584.87	13545.04	13544.81	13543	13659.16		957.9	960.7	42925.33	42925.89
524.8	527.6	5458.889	5566.804	4807.68	4698.461	4695.89	5681.165		277.8	280.6	4823.333	4852.997	4825.377	4828.761	4823.333	4860.469		857.8	860.6	39639.56	37840	37842.87	37878.76	37920.67	37974.03	39067.56	37835.99	37833.29	37832.34	39366.78		727.8	730.6	13713.78	13571.04	13555.29	13547.93	13558.92	13543	13573.66	13543.42	13543.17	13541.34	13647.02		957.8	960.6	42847.73	42848.29
524.7	527.5	5204.444	5403.589	4800.162	4697.285	4694.8	5511.435		277.7	280.5	4834.667	4862.936	4836.661	4839.876	4834.667	4870.14		857.7	860.5	39575.11	37819.29	37822.19	37858.96	37903.18	37942.7	38963.39	37815.27	37812.53	37811.57	39256.53		727.7	730.5	13804.89	13569.45	13553.56	13545.43	13554.03	13540.47	13563.83	13540.9	13540.63	13538.78	13636.82		957.7	960.5	42861.87	42862.43
524.6	527.4	5186.667	5286.265	4793.209	4696.15	4693.747	5388.13		277.6	280.4	4885.333	4912.306	4887.279	4890.339	4885.333	4919.258		857.6	860.4	39279.11	37801.86	37804.8	37842.47	37889.17	37915.95	38865.11	37797.83	37795.06	37794.08	39153.68		727.6	730.4	13857.33	13567.37	13551.39	13542.4	13548.98	13537.4	13555.23	13537.84	13537.56	13535.68	13628.37		957.6	960.4	42849.33	42849.9
524.5	527.3	5081.111	5199.086	4786.988	4695.242	4692.917	5295.482		277.5	280.3	4932.667	4958.431	4934.566	4937.48	4932.667	4965.143		857.5	860.3	39202.67	37785.13	37788.1	37826.72	37876.07	37890.34	38769.46	37781.1	37778.29	37777.29	39054.17		727.5	730.3	13729.78	13566.56	13550.55	13540.58	13545.45	13535.54	13549.28	13535.99	13535.69	13533.8	13623.06		957.5	960.3	43035.33	43035.91
524.4	527.2	5016.667	5132.094	4781.368	4694.475	4692.223	5223.49		277.4	280.2	4882.667	4907.302	4884.521	4887.299	4882.667	4913.789		857.4	860.2	39061.33	37769.89	37772.9	37812.49	37864.7	37867.29	38677.29	37765.85	37763	37761.99	38959.48		727.4	730.2	13699.56	13566.08	13550.11	13539.04	13542.47	13533.95	13544.68	13534.42	13534.1	13532.18	13619.56		957.4	960.2	42934.27	42934.84
524.3	527.1	4977.778	5079.43	4776.196	4693.792	4691.612	5166.196		277.3	280.1	4892.667	4916.247	4894.478	4897.127	4892.667	4922.518		857.3	860.1	39048.89	37754.61	37757.66	37798.26	37853.55	37844.62	38589.74	37750.57	37747.68	37746.65	38870.11		727.3	730.1	13675.11	13565.89	13550.05	13537.72	13539.93	13532.59	13541.06	13533.08	13532.74	13530.8	13617.48		957.3	960.1	42795.73	42796.31
524.2	527	4890	5036.835	4771.581	4693.3	4691.187	5119.343		277.2	280	4900	4922.592	4901.77	4904.299	4900	4928.66		857.2	860	39012.44	37739.58	37742.67	37784.32	37842.92	37823.06	38505.23	37735.54	37732.61	37731.57	38784.97		727.2	730	13524.44	13567.1	13551.51	13537.73	13538.9	13532.56	13539.34	13533.06	13532.7	13530.73	13617.75		957.2	960	42861.6	42862.19
524.1	526.9	4923.333	5001.367	4767.209	4692.739	4690.689	5079.937		277.1	279.9	4929.333	4950.998	4931.063	4933.479	4929.333	4956.873		857.1	859.9	38658.22	37728.6	37731.73	37774.45	37836.64	37805.93	38427.55	37724.55	37721.58	37720.52	38707.37		727.1	729.9	13652	13567.26	13552.07	13536.62	13536.91	13531.41	13536.91	13531.93	13531.54	13529.56	13617.76		957.1	959.9	42871.07	42871.66
524	526.8	4807.778	4971.608	4763.348	4692.427	4690.439	5046.506		277	279.8	4892.667	4913.46	4894.357	4896.668	4892.667	4919.152		857	859.8	38788.44	37715.94	37719.11	37762.95	37829.01	37787.81	38353.61	37711.88	37708.87	37707.8	38634.6		727	729.8	13662.67	13567.38	13552.79	13535.4	13534.92	13530.15	13534.65	13530.68	13530.27	13528.26	13618.42		957	959.8	42893.47	42894.06
523.9	526.7	4697.778	4946.315	4760.001	4692.352	4690.423	5017.823		276.9	279.7	4931.333	4951.308	4932.986	4935.197	4931.333	4956.824		856.9	859.7	38938.22	37701.34	37704.55	37749.55	37819.8	37768.08	38281.07	37697.28	37694.23	37693.13	38563.98		726.9	729.7	13772.89	13566.52	13552.77	13533.09	13531.96	13527.8	13531.51	13528.35	13527.92	13525.88	13618.74		956.9	959.7	42854.4	42855
523.8	526.6	4804.444	4924.205	4756.647	4692.052	4690.179	4992.547		276.8	279.6	4951.333	4970.537	4952.95	4955.067	4951.333	4975.887		856.8	859.6	38780	37688.45	37691.7	37737.91	37812.72	37750.63	38213.31	37684.39	37681.29	37680.18	38499.14		726.8	729.6	13801.33	13565.46	13552.86	13530.49	13528.78	13525.16	13528.21	13525.72	13525.27	13523.2	13619.52		956.8	959.6	42786.93	42787.54
523.7	526.5	4808.889	4904.878	4753.48	4691.745	4689.924	4970.255		276.7	279.5	4928.667	4947.143	4930.248	4932.276	4928.667	4952.334		856.7	859.5	38506.22	37678.67	37681.96	37729.43	37809.2	37736.58	38154.02	37674.61	37671.47	37670.33	38443.58		726.7	729.5	13746.67	13565.01	13553.97	13528.39	13526.17	13523.02	13525.54	13523.6	13523.12	13521.03	13621.6		956.7	959.5	42749.87	42755.54
523.6	526.4	4797.778	4887.893	4750.549	4691.462	4689.693	4950.518		276.6	279.4	5009.333	5027.124	5010.881	5012.826	5009.333	5032.164		856.6	859.4	38458.22	37669.35	37672.68	37721.44	37806.64	37723.43	38098.65	37665.28	37662.1	37660.94	38392.95		726.6	729.4	13640	13565.68	13556.72	13527.31	13524.64	13521.89	13523.96	13522.5	13521.99	13519.87	13625.58		956.6	959.4	42728.27	42755.08
523.5	526.3	4764.444	4872.922	4747.85	4691.253	4689.533	4932.959		276.5	279.3	5008.667	5025.809	5010.181	5012.047	5008.667	5030.704		856.5	859.3	38489.33	37659.54	37662.92	37713.03	37804.17	37710.06	38045.74	37655.48	37652.24	37651.07	38345.67		726.5	729.3	13891.56	13564.02	13557.78	13523.78	13520.69	13518.32	13519.99	13518.94	13518.4	13516.26	13628.09		956.5	959.3	42763.73	42754.92
523.4	526.2	4742.222	4859.643	4745.355	4691.093	4689.42	4917.251		276.4	279.2	4985.333	5001.863	4986.816	4988.607	4985.333	5006.619		856.4	859.2	38338.67	37651.41	37654.83	37706.35	37804.04	37698.71	37999.25	37647.35	37644.07	37642.88	38305.86		726.4	729.2	13833.33	13563.06	13560.29	13520.78	13517.32	13515.27	13516.6	13515.92	13515.35	13513.18	13632.33		956.4	959.2	42694.4	42753.88
523.3	526.1	4765.556	4847.736	4742.966	4690.885	4689.257	4903.072		276.3	279.1	5102.667	5118.616	5104.118	5105.839	5102.667	5123.24		856.3	859.1	38285.33	37643.82	37647.29	37700.26	37805.19	37688.13	37956.58	37639.76	37636.43	37635.22	38270.92		726.3	729.1	13633.33	13564.19	13565.83	13519.69	13515.89	13514.14	13515.17	13514.81	13514.21	13512.01	13639.85		956.3	959.1	42822	42752.63
523.2	526	4744.444	4837.087	4740.745	4690.723	4689.139	4890.277		276.2	279	5018.667	5034.066	5020.088	5021.742	5018.667	5038.563		856.2	859	38096.89	37638.39	37641.9	37696.39	37809.39	37679.97	37918.62	37634.33	37630.95	37629.72	38241.91		726.2	729	13824.44	13563.63	13570.84	13516.73	13512.62	13511.14	13511.9	13511.83	13511.2	13508.97	13647.09		956.2	959	42819.6	42751.42
523.1	525.9	4753.333	4827.454	4738.632	4690.544	4689.001	4878.627		276.1	278.9	4959.333	4974.21	4960.726	4962.316	4959.333	4978.586		856.1	858.9	38096.44	37632.9	37636.45	37692.52	37814.57	37671.95	37884.47	37628.84	37625.41	37624.16	38218.01		726.1	728.9	13883.56	13562.67	13576.84	13513.17	13508.77	13507.54	13508.05	13508.25	13507.58	13505.33	13655.57		956.1	958.9	42848.8	42749.65
523	525.8	4710	4818.815	4736.728	4690.459	4688.956	4868.089		276	278.8	5037.333	5051.714	5038.698	5040.228	5037.333	5055.973		856	858.8	37709.78	37631.95	37635.55	37693.25	37825.52	37668.68	37857.73	37627.9	37624.41	37623.14	38203.04		726	728.8	13780	13562.91	13585.69	13510.59	13505.91	13504.9	13505.19	13505.65	13504.94	13502.66	13667.17		956	958.8	42767.2	42749.33
522.9	525.7	4703.333	4810.979	4734.935	4690.39	4688.926	4858.453		275.9	278.7	5079.333	5093.243	5080.67	5082.144	5079.333	5097.39		855.9	858.7	37988	37627.67	37631.32	37690.73	37834.59	37662.25	37829.73	37623.62	37620.09	37618.79	38188.49		725.9	728.7	13767.56	13563.61	13596.81	13508.1	13503.17	13502.37	13502.45	13503.14	13502.4	13500.08	13681.46		955.9	958.7	42735.47	42749.1
522.8	525.6	4713.333	4803.816	4733.225	4690.301	4688.873	4849.594		275.8	278.6	5083.333	5096.794	5084.644	5086.063	5083.333	5100.834		855.8	858.6	37697.78	37626.8	37630.5	37691.69	37848.72	37659.39	37808.08	37622.76	37619.17	37617.85	38182.18		725.8	728.6	13889.78	13563.41	13609.23	13504.4	13499.22	13498.62	13498.51	13499.42	13498.64	13496.29	13697.39		955.8	958.6	42768.27	42748.75
522.7	525.5	4745.556	4797.195	4731.534	4690.144	4688.752	4841.369		275.7	278.5	5166	5179.034	5167.285	5168.652	5166	5182.971		855.7	858.5	37731.11	37625.53	37629.28	37692.32	37864.39	37656.26	37788.37	37621.49	37617.85	37616.5	38180.01		725.7	728.5	13965.33	13562.78	13623.73	13499.93	13494.52	13494.11	13493.81	13494.93	13494.11	13491.73	13715.8		955.7	958.5	42839.73	42747.1
522.6	525.4	4698.889	4791.218	4730.02	4690.088	4688.73	4833.865		275.6	278.4	5136	5148.627	5137.26	5138.578	5136	5152.465		855.6	858.4	37588.89	37625.28	37629.08	37694.06	37883.44	37654.29	37771.28	37621.25	37617.55	37616.18	38183		725.6	728.4	14008	13562.09	13640.98	13495	13489.37	13489.13	13488.67	13489.99	13489.12	13486.71	13737.36		955.6	958.4	42719.2	42746.63
522.5	525.3	4638.889	4785.647	4728.507	4689.948	4688.624	4826.855		275.5	278.3	5170	5182.239	5171.236	5172.507	5170	5185.982		855.5	858.3	37829.78	37622.81	37626.66	37693.66	37903.12	37650.22	37754.07	37618.79	37615.03	37613.63	38188.95		725.5	728.3	13927.11	13562.61	13662.5	13490.81	13484.97	13484.9	13484.28	13485.79	13484.87	13482.43	13763.69		955.5	958.3	42749.47	42746.57
522.4	525.2	4737.778	4780.511	4727.064	4689.811	4688.519	4820.349		275.4	278.2	5229.333	5241.201	5230.546	5231.773	5229.333	5244.853		855.4	858.2	37422.22	37431.48	37435.38	37504.49	37737.38	37457.39	37549.83	37427.47	37423.65	37422.22	38011.51		725.4	728.2	13838.22	13564.67	13688.67	13487.45	13481.39	13481.49	13480.71	13482.41	13481.44	13478.97	13795.42		955.4	958.2	42865.07	42744.43
522.3	525.1	4688.889	4776.236	4726.16	4690.151	4688.889	4814.769		275.3	278.1	5190	5201.514	5191.189	5192.374	5190	5205.078		855.3	858.1	37676.44	37685.78	37689.73	37761.06	38021.52	37710.29	37792.36	37681.78	37677.9	37676.44	38285.3		725.3	728.1	13904.44	13566.71	13718.23	13483.4	13477.15	13477.4	13476.48	13478.35	13477.34	13474.84	13831.23		955.3	958.1	42860.13	42742.33
522.2	525	4594.444	4677.493	4630.511	4595.677	4594.444	4714.791		275.2	278	5165.333	5176.51	5166.501	5167.645	5165.333	5179.988		855.2	858	37457.78	37577.91	37581.92	37655.56	37948.82	37601.1	37674.18	37573.93	37569.99	37568.5	38203.89		725.2	728	14068	13567.89	13750.41	13477.73	13471.29	13471.68	13470.63	13472.67	13471.61	13469.07	13870.44		955.2	958	42700.53	42741.62
522.1	524.9	4530	4609.061	4564.915	4531.204	4530	4645.181		275.1	277.9	5187.333	5198.186	5188.479	5189.585	5187.333	5201.583		855.1	857.9	37575.11	37577.91	37581.98	37658.04	37990.25	37599.86	37665.23	37573.94	37569.94	37568.43	38238.19		725.1	727.9	14096.89	13569.59	13786.57	13471.73	13465.09	13465.63	13464.44	13466.66	13465.54	13462.96	13914.51		955.1	957.9	42826.13	42740.08
522	524.8	4623.333	4698.691	4657.153	4624.51	4623.333	4733.687		275	277.8	5137.333	5147.877	5138.458	5139.527	5137.333	5151.195		855	857.8	37595.11	37577.68	37581.81	37660.4	38039.04	37598.45	37656.84	37573.73	37569.66	37568.11	38280.81		725	727.8	14018.22	13573.12	13827.7	13466.43	13459.61	13460.28	13458.97	13461.36	13460.18	13457.56	13964.69		955	957.8	42796.13	42739.07
	--									--								854.9	857.7	37403.56	37575.89	37580.07	37661.32	38095.41	37595.56	37647.84	37571.95	37567.81	37566.24	38332.18		724.9	727.7	14074.67	13577.59	13872.28	13460.53	13453.52	13454.34	13452.9	13455.45	13454.21	13451.56	14019.89		954.9	957.7	42796.13	42738.03
	--									--								854.8	857.6	37362.22	37573.65	37577.89	37661.93	38162.29	37592.26	37639.38	37569.73	37565.52	37563.92	38395.24		724.8	727.6	14201.78	13582.24	13919.27	13453.34	13446.15	13447.1	13445.55	13448.26	13446.96	13444.27	14078.98		954.8	957.6	42865.47	42735.72
	--									--								854.7	857.5	37435.11	37572.26	37576.56	37663.53	38243.11	37589.9	37632.31	37568.37	37564.09	37562.45	38472.98		724.7	727.5	14205.33	13588.47	13969.3	13446.05	13438.68	13439.76	13438.09	13440.97	13439.59	13436.87	14142.83		954.7	957.5	42754.8	42735.37
	--									--								854.6	857.4	37652.44	37571.3	37575.66	37665.7	38339.82	37587.98	37626.27	37567.42	37563.07	37561.4	38567.42		724.6	727.4	14229.78	13596.29	14021.46	13438.45	13430.91	13432.11	13430.32	13433.37	13431.92	13429.16	14210.71		954.6	957.4	42855.73	42733.19
	--									--								854.5	857.3	37637.78	37570.49	37574.92	37668.19	38454.87	37586.29	37621.08	37566.64	37562.22	37560.51	38681.13		724.5	727.3	14117.78	13607.72	14076.16	13431.86	13424.15	13425.48	13423.58	13426.79	13425.27	13422.46	14283.76		954.5	957.3	42841.6	42731.22
	--									--								854.4	857.2	37876.44	37566.9	37571.38	37668.06	38588.29	37581.84	37613.45	37563.07	37558.57	37556.83	38813.76		724.4	727.2	14170.67	13621.74	14130.75	13424.7	13416.81	13418.27	13416.25	13419.63	13418.04	13415.19	14359.87		954.4	957.2	42890.27	42728.34
	--									--								854.3	857.1	37774.67	37564.44	37568.99	37669.25	38747.25	37578.58	37607.35	37560.65	37556.07	37554.29	38972.56		724.3	727.1	14375.11	13636.78	14182.55	13415.48	13407.42	13409	13406.88	13410.42	13408.74	13405.86	14436.3		954.3	957.1	42812	42726.82
	--									--								854.2	857	38125.33	37557.88	37562.49	37666.53	38929.9	37571.23	37597.62	37554.11	37549.45	37547.63	39155.77		724.2	727	14380	13655.15	14232.17	13406.13	13397.9	13399.6	13397.36	13401.08	13399.31	13396.38	14514.02		954.2	957	42795.47	42725.58
	--									--								854.1	856.9	38331.11	37548.84	37553.52	37661.55	39141.41	37561.45	37585.64	37545.1	37540.36	37538.5	39368.34		724.1	726.9	14359.56	13677.46	14278.5	13396.88	13388.48	13390.31	13387.96	13391.85	13389.99	13387.02	14592.3		954.1	956.9	42838.27	42723.53
	--									--								854	856.8	38520	37537.49	37542.24	37654.48	39385.5	37549.38	37571.59	37533.79	37528.96	37527.06	39613.98		724	726.8	14393.78	13704.75	14319.62	13387.21	13378.64	13380.59	13378.13	13382.2	13380.25	13377.23	14670.8		954	956.8	42929.33	42719.81
	--									--								853.9	856.7	38617.78	37524.87	37529.69	37646.39	39666.6	37536.07	37556.6	37521.2	37516.29	37514.35	39897.26		723.9	726.7	14484.89	13736.78	14353.67	13376.56	13367.83	13369.9	13367.33	13371.58	13369.52	13366.46	14747.96		953.9	956.7	42908.13	42716.4
	--									--								853.8	856.6	39232	37504.94	37509.83	37631.25	39981.77	37515.48	37534.46	37501.31	37496.31	37494.33	40215.05		723.8	726.6	14462.67	13774.56	14380.52	13366.03	13357.13	13359.32	13356.64	13361.08	13358.91	13355.8	14823.58		953.8	956.6	42856.13	42713.87
	--									--								853.7	856.5	39534.67	37481.25	37486.22	37612.64	40337.18	37491.16	37508.7	37477.67	37472.58	37470.55	40573.56		723.7	726.5	14682.22	13816.23	14396.77	13353.26	13344.19	13346.51	13343.71	13348.35	13346.06	13342.9	14894.75		953.7	956.5	42952.67	42709.55
	--									--								853.6	856.4	40023.11	37451.6	37456.64	37588.38	40732.55	37460.88	37477.21	37448.06	37442.87	37440.8	40972.6		723.6	726.4	14856.89	13862.66	14402	13338.67	13329.43	13331.87	13328.96	13333.8	13331.39	13328.18	14961.5		953.6	956.4	42963.47	42704.95
	--									--								853.5	856.3	40693.78	37413.78	37418.89	37556.29	41166.69	37422.47	37437.66	37410.29	37405.01	37402.88	41410.89		723.5	726.3	14868	13918.22	14397.2	13323.83	13314.42	13316.99	13313.96	13319	13316.47	13313.21	15027.61		953.5	956.3	42856.27	42702.21
	--									--								853.4	856.2	41163.56	37370.05	37375.24	37518.66	41641.72	37378.15	37392.29	37366.61	37361.22	37359.05	41890.58		723.4	726.2	14754.67	13983.2	14383.26	13309.95	13300.37	13303.06	13299.92	13305.18	13302.51	13299.19	15093.07		953.4	956.2	42928	42698.13
	--									--								853.3	856.1	41812.44	37318.24	37323.51	37473.38	42154.01	37325.79	37339.02	37314.86	37309.37	37307.15	42408.15		723.3	726.1	14832	14055.65	14358.35	13295.18	13285.43	13288.26	13284.99	13290.47	13287.66	13284.29	15155.94		953.3	956.1	42924.67	42694.03
	--									--								853.2	856	42621.33	37256.4	37261.75	37418.51	42698.61	37263.4	37275.79	37253.08	37247.49	37245.21	42958.57		723.2	726	15011.11	14134.9	14321.77	13278.53	13268.6	13271.56	13268.17	13273.89	13270.92	13267.5	15215.84		953.2	956	42991.6	42688.65
	--									--								853.1	855.9	43527.56	37183.28	37188.71	37352.84	43270.91	37189.75	37201.35	37180.02	37174.32	37171.99	43537.3		723.1	725.9	15147.56	14221.63	14274.48	13260.39	13250.29	13253.39	13249.87	13255.83	13252.69	13249.22	15274.04		953.1	955.9	42867.87	42685.4
	--									--								853	855.8	44339.56	37099.85	37105.36	37277.4	43863.55	37105.8	37116.71	37096.65	37090.84	37088.45	44137.03		723	725.8	15124.44	14320.84	14218.87	13242.31	13232.03	13235.26	13231.62	13237.83	13234.52	13230.99	15336.35		953	955.8	42892.8	42681.65
	--									--								852.9	855.7	45299.11	37004.26	37009.85	37190.4	44465.89	37009.71	37019.97	37001.12	36995.2	36992.75	44747.17		722.9	725.7	15284.44	14427.59	14154.19	13222.49	13212.03	13215.41	13211.63	13218.1	13214.61	13211.02	15398.91		952.9	955.7	42917.6	42677.38
	--									--								852.8	855.6	46199.11	36897.06	36902.74	37092.46	45068.33	36902.02	36911.68	36894	36887.96	36885.44	45358.13		722.8	725.6	15368.89	14542.37	14082.38	13201.66	13191.03	13194.54	13190.63	13197.38	13193.69	13190.04	15463.4		952.8	955.6	43044	42670.75
	--									--								852.7	855.5	46745.33	36782.25	36788.02	36987.66	45663.22	36786.73	36795.84	36779.27	36773.1	36770.52	45962.42		722.7	725.5	15456	14664.87	14004.73	13179.78	13168.97	13172.63	13168.58	13175.62	13171.72	13168.01	15530.84		952.7	955.5	43112.4	42662.76
	--									--								852.6	855.4	47420.44	36658.23	36664.09	36874.48	46236.13	36662.24	36670.85	36655.33	36649.04	36646.4	46545.62		722.6	725.4	15555.56	14794.96	13922.46	13156.72	13145.73	13149.54	13145.35	13152.7	13148.56	13144.79	15602.47		952.6	955.4	43091.87	42655.01
	--									--								852.5	855.3	48309.78	36522.4	36528.36	36750.46	46770.76	36525.97	36534.08	36519.59	36513.17	36510.46	47091.59		722.5	725.3	15606.22	14933.87	13837.42	13132.95	13121.77	13125.73	13121.4	13129.07	13124.7	13120.86	15680.9		952.5	955.3	43069.33	42647.51
	--									--								852.4	855.2	48877.78	36378.37	36384.42	36619.33	47256.61	36381.48	36389.17	36375.65	36369.1	36366.31	47589.95		722.4	725.2	15744.89	15077.24	13750.04	13107.6	13096.23	13100.36	13095.87	13103.89	13099.25	13095.34	15763.07		952.4	955.2	42956	42641.93
	--									--								852.3	855.1	49147.56	36229.52	36235.66	36484.68	47683.02	36232.2	36239.46	36226.9	36220.2	36217.34	48030.24		722.3	725.1	15903.11	15223.77	13661.33	13080.47	13068.91	13073.2	13068.55	13076.93	13072.02	13068.04	15848.87		952.3	955.1	43013.6	42635.21
	--									--								852.2	855	49292.89	36077.23	36083.48	36348.11	48037.93	36079.49	36086.36	36074.72	36067.88	36064.94	48400.6		722.2	725	16131.56	15371.52	13571.64	13050.85	13039.1	13043.56	13038.75	13047.52	13042.3	13038.26	15937.44		952.2	955	43129.87	42626.27
	--									--								852.1	854.9	49503.11	35920.73	35927.07	36209.13	48308.22	35922.57	35929.07	35918.32	35911.34	35908.32	48688.22		722.1	724.9	16108.44	15521.54	13484.31	13021.17	13009.23	13013.86	13008.88	13018.06	13012.52	13008.4	16030.75		952.1	954.9	43153.47	42616.74
	--									--								852	854.8	49555.11	35761.79	35768.24	36069.81	48484.96	35763.21	35769.39	35759.5	35752.37	35749.26	48884.43		722	724.8	16216.89	15669.8	13398.78	12990.16	12978.01	12982.83	12977.67	12987.29	12981.39	12977.21	16125.47		952	954.8	43221.73	42605.8
	--									--								851.9	854.7	49039.11	35607.01	35613.57	35937.05	48566.09	35608.04	35613.89	35604.85	35597.56	35594.36	48987.51		721.9	724.7	16268	15814.51	13316.13	12958.34	12945.99	12951	12945.66	12955.74	12949.47	12945.21	16220.39		951.9	954.7	43246.93	42594.22
	--									--								851.8	854.6	49080.44	35449.95	35456.61	35804.83	48538.97	35450.58	35456.13	35447.92	35440.47	35437.18	48985.2		721.8	724.6	16454.22	15952.53	13235.42	12924.41	12911.86	12917.06	12911.53	12922.12	12915.43	12911.09	16312.71		951.8	954.6	43186.53	42583.51
	--									--								851.7	854.5	48434.22	35298.59	35305.36	35681.72	48408.09	35298.83	35304.1	35296.7	35289.08	35285.7	48882.61		721.7	724.5	16510.22	16083.23	13158.09	12889.6	12876.84	12882.25	12876.52	12887.65	12880.51	12876.1	16402.03		951.7	954.5	43126.53	42573.69
	--									--								851.6	854.4	48147.11	35148.82	35155.7	35564.29	48168.73	35148.67	35153.68	35147.07	35139.28	35135.79	48675.69		721.6	724.4	16684	16201.5	13083.05	12852.77	12839.8	12845.42	12839.49	12851.2	12843.57	12839.07	16483.31		951.6	954.4	43092	42564.32
	--									--								851.5	854.3	47438.67	35005.55	35012.55	35458.67	47828.12	35005.03	35009.78	35003.96	34995.99	34992.4	48372.86		721.5	724.3	16779.11	16304.63	13010.97	12814.66	12801.47	12807.32	12801.16	12813.51	12805.35	12800.76	16553.75		951.5	954.3	43177.33	42553.24
	--									--								851.4	854.2	47106.67	34864.49	34871.6	35361.43	47387.05	34863.59	34868.11	34863.06	34854.91	34851.2	47975.82		721.4	724.2	16678.67	16394.36	12943.57	12777.16	12763.75	12769.83	12763.45	12776.49	12767.73	12763.05	16614.95		951.4	954.2	43208.4	42541.4
	--									--								851.3	854.1	46529.78	34728.5	34735.74	35276.74	46856.09	34727.25	34731.54	34727.25	34718.91	34715.09	47496.4		721.3	724.1	16728	16467.61	12879.16	12738.81	12725.18	12731.5	12724.89	12738.68	12729.26	12724.5	16663.59		951.3	954.1	43243.87	42528.7
	--									--								851.2	854	45904.44	34598.22	34605.58	35206.8	46245.82	34596.6	34600.68	34597.15	34588.61	34584.67	46946.77		721.2	724	16695.11	16523.67	12818.23	12700.42	12686.56	12693.14	12686.27	12700.9	12690.75	12685.89	16698.67		951.2	954	43265.87	42515.38
	--									--								851.1	853.9	45304.89	34473.41	34480.89	35153.25	45567.79	34471.44	34475.32	34472.54	34463.8	34459.72	46340.36		721.1	723.9	16872	16554.29	12758.41	12659.93	12645.84	12652.69	12645.56	12661.11	12650.14	12645.19	16711.63		951.1	953.9	43320.13	42500.84
	--									--								851	853.8	44888.44	34352	34359.61	35116.25	44832.11	34349.67	34353.37	34351.33	34342.38	34338.17	45689.49		721	723.8	16633.33	16563.92	12703.38	12621.37	12607.05	12614.18	12606.77	12623.36	12611.46	12606.41	16706.59		951	953.8	43410.53	42484.4
	--									--								850.9	853.7	44154.22	34237.73	34245.47	35102.14	44057.12	34235.05	34238.57	34237.28	34228.11	34223.77	45015.13		720.9	723.7	16700.89	16551.33	12649.84	12581.79	12567.23	12574.65	12566.95	12584.69	12571.75	12566.6	16682		950.9	953.7	43366.67	42468.45
	--									--								850.8	853.6	43556	34129.11	34136.98	35112.45	43257.35	34126.08	34129.43	34128.89	34119.49	34115	44334.81		720.8	723.6	16736.89	16516.48	12597.74	12541.47	12526.66	12534.4	12526.39	12545.43	12531.3	12526.05	16637.5		950.8	953.6	43389.07	42451.81
	--									--								850.7	853.5	43081.78	34024.74	34032.75	35149.23	42445.29	34021.37	34024.56	34024.77	34015.14	34010.49	43664.46		720.7	723.5	16560	16461.25	12548.85	12502.49	12487.43	12495.49	12487.16	12507.66	12492.19	12486.83	16574.7		950.7	953.5	43420	42434.32
	--									--								850.6	853.4	42423.11	33926.84	33934.99	35218.54	41636.24	33923.13	33926.16	33927.13	33917.25	33912.43	43023.25		720.6	723.4	16569.33	16377.91	12501.08	12463.03	12447.72	12456.13	12447.46	12469.63	12452.6	12447.14	16485.61		950.6	953.4	43446.53	42416.03
	--									--								850.5	853.3	42600.89	33825.72	33834.02	35314.99	40832.48	33821.68	33824.57	33826.29	33816.16	33811.17	42417.74		720.5	723.3	16527.11	16272.88	12454.68	12423.61	12408.04	12416.82	12407.78	12431.89	12413.04	12407.46	16376.48		950.5	953.3	43478.8	42396.82
	--									--								850.4	853.2	42399.11	33725.78	33734.22	35447.61	40048.92	33721.4	33724.16	33726.65	33716.25	33711.07	41867.48		720.4	723.2	16411.56	16149.21	12410.13	12384.93	12369.09	12378.27	12368.84	12395.19	12374.23	12368.53	16250.18		950.4	953.2	43468.4	42377.46
	--									--								850.3	853.1	41874.22	33630.79	33639.39	35625.12	39298.23	33626.08	33628.7	33631.97	33621.29	33615.93	41390.08		720.3	723.1	16274.22	16008.29	12367.48	12347.22	12331.11	12340.7	12330.86	12359.82	12336.37	12330.56	16107.95		950.3	953.1	43567.87	42355.95
	--									--								850.2	853	41881.78	33534.6	33543.36	35846.5	38581.42	33529.57	33532.07	33536.12	33525.16	33519.59	40991.68		720.2	723	15909.78	15853.65	12328.76	12312.68	12296.29	12306.33	12296.05	12328.07	12301.7	12295.75	15953.24		950.2	953	43542.8	42334.5
	--									--								850.1	852.9	41826.22	33437.95	33446.86	36117.65	37904.6	33432.59	33434.97	33439.82	33428.56	33422.77	40683.59		720.1	722.9	15832.44	15679.85	12291.08	12278.57	12261.89	12272.4	12261.65	12297.26	12267.44	12261.37	15780.59		950.1	952.9	43740.93	42309.09
	--									--								850	852.8	41895.11	33339.36	33348.44	36442.14	37270.02	33333.67	33335.94	33341.61	33330.04	33324.02	40473.05		720	722.8	15685.78	15495.38	12255	12245.55	12228.59	12239.61	12228.35	12268.18	12234.27	12228.07	15598.45		950	952.8	43753.07	42283
	--									--								849.9	852.7	41706.67	33241.82	33251.06	36827.6	36682.76	33235.81	33237.97	33244.47	33232.58	33226.32	40369.84		719.9	722.7	15322.67	15304.25	12222.55	12215.75	12198.49	12210.06	12198.26	12243.07	12204.32	12197.98	15410.88		949.9	952.7	43895.2	42253.87
	--									--								849.8	852.6	41931.56	33140.53	33149.94	37273.27	36138.68	33134.2	33136.26	33143.61	33131.38	33124.86	40373.84		719.8	722.6	15209.78	15105.93	12191.24	12186.76	12169.19	12181.36	12168.97	12219.65	12175.18	12168.69	15217.42		949.8	952.6	43822	42225.53
	--									--								849.7	852.5	41973.33	33037.57	33047.15	37784.73	35639.33	33030.91	33032.87	33041.11	33028.53	33021.73	40490.1		719.7	722.5	14974.22	14903.35	12162.22	12159.78	12141.91	12154.72	12141.68	12199.31	12148.05	12141.42	15021.1		949.7	952.5	43824	42196.65
	--									--								849.6	852.4	41982.67	32933.3	32943.06	38367.55	35183.51	32926.32	32928.19	32937.32	32924.38	32917.29	40722.65		719.6	722.4	14645.33	14699.77	12136.35	12135.75	12117.55	12131.06	12117.33	12183.13	12123.85	12117.07	14825.31		949.6	952.4	43865.73	42166.5
	--									--								849.5	852.3	42269.78	32824.47	32834.42	39014.84	34765.62	32817.17	32818.95	32829.01	32815.69	32808.28	41062.21		719.5	722.3	14466.67	14497.19	12112.17	12113.22	12094.7	12108.97	12094.48	12169.9	12101.17	12094.22	14632.23		949.5	952.3	43822	42136.58
	--									--								849.4	852.2	42589.78	32710.64	32720.78	39724.17	34382.28	32703.03	32704.72	32715.74	32702.02	32694.27	41503.46		719.4	722.2	14226.67	14297.82	12090.26	12092.81	12073.95	12089.07	12073.74	12160.43	12080.6	12073.49	14444.25		949.4	952.2	43767.07	42107.13
	--									--								849.3	852.1	42944.44	32591.35	32601.69	40490.9	34029.74	32583.42	32585.04	32597.04	32582.91	32574.8	42038.45		719.3	722.1	14079.56	14102.28	12069.71	12073.64	12054.44	12070.5	12054.23	12154.12	12061.26	12053.98	14262.27		949.3	952.1	43677.87	42078.74
	--									--								849.2	852	43127.56	32468.54	32479.07	41310.37	33706.41	32460.29	32461.83	32474.87	32460.3	32451.81	42659.02		719.2	722	13872.89	13913.27	12051.09	12056.3	12036.74	12053.85	12036.54	12151.94	12043.75	12036.3	14089.39		949.2	952	43620.4	42050.89
	--									--								849.1	851.9	43854.67	32335.83	32346.56	42167.12	33402.36	32327.26	32328.72	32342.83	32327.81	32318.91	43346.15		719.1	721.9	13658.67	13733.55	12034.48	12040.87	12020.96	12039.23	12020.76	12154.11	12028.16	12020.52	13928.46		949.1	951.9	43565.47	42023.52
	--									--								849	851.8	44268	32196.75	32207.69	43053.02	33117.65	32187.86	32189.26	32204.49	32188.99	32179.64	44088.24		719	721.8	13556.89	13561.85	12018.79	12026.3	12006.02	12025.59	12005.81	12159.8	12013.41	12005.59	13778.47		949	951.8	43552.67	41995.89
	--									--								848.9	851.7	44239.11	32056.39	32067.54	43959.08	32854.02	32047.18	32048.51	32064.91	32048.91	32039.08	44872.98		718.9	721.7	13484.89	13398.58	12003.71	12012.29	11991.62	12012.68	11991.43	12168.95	11999.22	11991.2	13640.06		948.9	951.7	43282.93	41972.64
	--									--								848.8	851.6	44668.89	31909.38	31920.76	44863.62	32603.83	31899.85	31901.12	31918.75	31902.23	31891.87	45676.41		718.8	721.6	13294.22	13245.45	11990.41	12000	11978.95	12001.67	11978.75	12182.92	11986.76	11978.53	13515.19		948.8	951.6	43272.4	41949.15
	--									--								848.7	851.5	45255.11	31753.83	31765.43	45746.57	32361.3	31743.98	31745.18	31764.11	31747.04	31736.12	46474.59		718.7	721.5	13216.44	13103.49	11977.8	11988.35	11966.9	11991.53	11966.71	12200.8	11974.93	11966.5	13405.05		948.7	951.5	43074	41928.82
	--									--								848.6	851.4	45599.56	31592.45	31604.29	46591.04	32126.65	31582.28	31583.43	31603.72	31586.07	31574.54	47248.15		718.6	721.4	13184.89	12972.57	11965.41	11976.91	11955.05	11981.85	11954.86	12222.26	11963.31	11954.65	13309.68		948.6	951.4	43123.33	41907.24
	--									--								848.5	851.3	46293.33	31421.11	31433.18	47372.5	31893.55	31410.62	31411.7	31433.43	31415.19	31402.99	47970.37		718.5	721.3	13079.56	12851.78	11953.98	11966.39	11944.11	11973.44	11943.92	12248.07	11952.6	11943.71	13228.31		948.5	951.3	42964.13	41888.14
	--									--								848.4	851.2	46884	31240.88	31253.2	48071.47	31661.21	31230.07	31231.1	31254.36	31235.48	31222.55	48619.91		718.4	721.2	13075.56	12740.03	11942.52	11955.81	11933.09	11965.4	11932.91	12277.2	11941.84	11932.71	13159.86		948.4	951.2	42858.4	41870.61
	--									--								848.3	851.1	47638.67	31049.76	31062.34	48665.92	31425.99	31038.63	31039.61	31064.48	31044.95	31031.22	49173.15		718.3	721.1	13046.22	12637.38	11931.26	11945.42	11922.26	11958.03	11922.08	12309.78	11931.26	11921.88	13104.32		948.3	951.1	42859.73	41852.73
	--									--								848.2	851	48280	30848.94	30861.78	49138.39	31187.7	30837.48	30838.41	30865.03	30844.79	30830.18	49611.27		718.2	721	13060	12545.03	11919.8	11934.81	11911.19	11950.98	11911.01	12345.17	11920.45	11910.81	13062.74		948.2	951	42734.27	41836.8
	--									--								848.1	850.9	49038.22	30636.95	30650.05	49470.78	30943.72	30625.16	30626.04	30654.53	30633.54	30617.96	49915.06		718.1	720.9	13090.22	12461.16	11907.96	11923.81	11899.71	11944.21	11899.54	12382.84	11909.26	11899.34	13033.07		948.1	950.9	42691.47	41821.35
	--									--								848	850.8	49601.33	30415.92	30429.29	49651.38	30695.24	30403.8	30404.64	30435.15	30413.36	30396.7	50071.86		718	720.8	13041.33	12385.08	11896.5	11913.18	11888.6	11938.59	11888.43	12423.15	11898.44	11888.24	13014.29		948	950.8	42531.87	41808.51
	--									--								847.9	850.7	50089.78	30186.62	30200.27	49670.43	30442.21	30174.17	30174.97	30207.67	30185.02	30167.17	50071.16		717.9	720.7	13011.11	12316.17	11885.26	11902.76	11877.68	11934.06	11877.51	12465.33	11887.82	11877.32	13005.32		947.9	950.7	42443.2	41797.04
	--									--								847.8	850.6	50535.56	29949.46	29963.4	49519.08	30184.4	29936.68	29937.43	29972.52	29948.97	29929.77	49903.5		717.8	720.6	12966.22	12254.09	11874.36	11892.68	11867.09	11930.91	11866.92	12508.63	11877.54	11866.74	13005.07		947.8	950.6	42490.93	41784.49
	--									--								847.7	850.5	50841.78	29705.96	29720.2	49191.83	29922.79	29692.85	29693.56	29731.27	29706.74	29686.04	49562.92		717.7	720.5	13143.11	12197.72	11861.66	11880.79	11854.67	11927.32	11854.5	12550.08	11865.45	11854.32	13011.93		947.7	950.5	42303.6	41775.11
	--									--								847.6	850.4	50678.67	29461.53	29476.08	48703.56	29662.35	29448.08	29448.75	29489.35	29463.76	29441.36	49063.9		717.6	720.4	13158.67	12146.45	11848.71	11868.65	11841.98	11924.97	11841.82	12590.33	11853.11	11841.64	13024.53		947.6	950.4	42205.6	41767.32
	--									--								847.5	850.3	50309.33	29218.56	29233.42	48063.24	29405.12	29204.76	29205.4	29249.19	29222.47	29198.14	48415.17		717.5	720.3	13049.78	12100.72	11836.7	11857.46	11830.23	11925.19	11830.07	12629.63	11841.72	11829.9	13042.46		947.5	950.3	42061.73	41762
	--									--								847.4	850.2	49504.44	28982.13	28997.33	47286.36	29155.95	28968	28968.6	29015.95	28988.04	28961.47	47632.1		717.4	720.2	13032.44	12059.22	11824.77	11846.34	11818.53	11927.31	11818.37	12666.1	11830.4	11818.2	13063.63		947.4	950.2	41967.47	41758.28
	--									--								847.3	850.1	48453.78	28755.2	28770.73	46389.6	28917.59	28740.72	28741.29	28792.66	28763.45	28734.28	46731.31		717.3	720.1	13009.78	12021.59	11812.95	11835.35	11806.94	11931.56	11806.78	12698.81	11819.21	11806.62	13086.89		947.3	950.1	42144.4	41751.29
	--									--								847.2	850	47236.44	28539.82	28555.69	45391.54	28691.88	28524.99	28525.52	28581.44	28550.86	28518.63	45731.35		717.2	720	13148	11986.81	11799.69	11822.92	11793.89	11936.59	11793.74	12725.25	11806.58	11793.57	13110.46		947.2	950	42192	41743.32
	--									--								847.1	849.9	45499.11	28342.18	28358.4	44316.97	28484.86	28326.99	28327.49	28388.58	28356.7	28320.72	44657.15		717.1	719.9	13147.11	11954.57	11786.33	11810.39	11780.73	11943.92	11780.58	12745.87	11793.86	11780.41	13133.35		947.1	949.9	42108.67	41736.71
	--									--								847	849.8	43871.56	28161.2	28177.79	43184.77	28295.29	28145.66	28146.13	28213.12	28180.05	28139.47	43527.73		717	719.8	13134.22	11924.71	11772.97	11797.88	11767.56	11953.86	11767.41	12760.01	11781.15	11767.25	13154.8		947	949.8	41981.73	41732.28
	--									--								846.9	849.7	42285.78	27996.6	28013.57	42015.21	28122.78	27980.7	27981.14	28054.9	28020.87	27974.59	42363.65		716.9	719.7	13180	11896.38	11759.05	11784.82	11753.82	11966.41	11753.67	12766.44	11767.9	11753.51	13173.9		946.9	949.7	41989.07	41727.63
	--									--								846.8	849.6	40417.33	27851.86	27869.22	40832.2	27970.73	27835.6	27836.01	27917.58	27883.19	27829.56	41189.43		716.8	719.6	13237.78	11869.31	11744.44	11771.09	11739.38	11981.28	11739.24	12764.53	11753.98	11739.08	13189.68		946.8	949.6	41986.4	41722.95
	--									--								846.7	849.5	38919.11	27722.9	27740.66	39651.28	27834.99	27706.27	27706.66	27797.27	27763.62	27700.31	40021.44		716.7	719.5	13192.44	11844.48	11730.14	11757.68	11725.25	11999.47	11725.1	12754.81	11740.39	11724.95	13202.67		946.7	949.5	41879.2	41720.12
	--									--								846.6	849.4	37564	27608.23	27626.4	38489.21	27714.02	27591.23	27591.59	27692.7	27661.47	27585.35	38877.42		716.6	719.4	13166.22	11821.02	11715.96	11744.41	11711.23	12020.79	11711.09	12736.54	11726.95	11710.94	13211.45		946.6	949.4	41886.13	41717.11
	--									--								846.5	849.3	36441.33	27505.31	27523.91	37359.83	27605.22	27487.93	27488.27	27601.87	27575.47	27482.13	37772.92		716.5	719.3	13139.11	11798.8	11701.92	11731.3	11697.34	12045.21	11697.2	12710.43	11713.67	11697.05	13216.53		946.5	949.3	41963.2	41712.65
	--									--								846.4	849.2	35491.56	27412.26	27431.31	36275.44	27506.66	27394.51	27394.82	27523.09	27505.98	27388.78	36722.65		716.4	719.2	13149.33	11777.3	11687.66	11717.99	11683.21	12072.25	11683.07	12676.43	11700.19	11682.93	13217.62		946.4	949.2	41937.87	41708.58
	--									--								846.3	849.1	34596	27328.58	27348.08	35247.26	27417.79	27310.43	27310.73	27456.18	27454.25	27304.77	35739.86		716.3	719.1	13101.33	11757.06	11673.73	11705.03	11669.42	12102.3	11669.28	12635.61	11687.09	11669.14	13215.55		946.3	949.1	41907.2	41704.98
	--									--								846.2	849	33830.67	27252.83	27272.81	34283.06	27337.17	27234.3	27234.57	27400.12	27421.38	27228.71	34835.25		716.2	719	13192.44	11736.63	11658.78	11691.08	11654.6	12133.72	11654.47	12587.25	11673.01	11654.32	13209.27		946.2	949	41865.73	41702.07
	--									--								846.1	848.9	33300	27182.4	27202.86	33386.88	27262.14	27163.47	27163.72	27352.73	27408.98	27157.95	34017.52		716.1	718.9	13202.67	11716.51	11643.6	11676.92	11639.54	12167.18	11639.41	12532.92	11658.74	11639.27	13199.93		946.1	948.9	41779.07	41700.67
	--									--								846	848.8	33026.67	27114.33	27135.29	32560.04	27189.72	27095	27095.23	27311.57	27417.16	27089.55	33291.49		716	718.8	13157.78	11697.18	11628.71	11663.08	11624.77	12202.32	11624.64	12474.02	11644.81	11624.51	13188.01		946	948.8	41730.67	41700.12
	--									--								845.9	848.7	32562.22	27050.88	27072.36	31808.6	27122.16	27031.15	27031.36	27279.43	27450.84	27025.76	32666.44		715.9	718.7	13182.67	11677.9	11613.45	11648.9	11609.62	12237.88	11609.49	12410.83	11630.55	11609.35	13173.13		945.9	948.7	41828.4	41697.79
	--									--								845.8	848.6	32305.78	26989.69	27011.7	31130.7	27057.06	26969.54	26969.73	27254.5	27511.09	26964.22	32144.46		715.8	718.6	13136.44	11659.36	11598.49	11635.05	11594.77	12273.9	11594.64	12345.02	11616.68	11594.51	13156.36		945.8	948.6	41740.8	41697
	--									--								845.7	848.5	31865.33	26932.92	26955.49	30524.36	26996.58	26912.35	26912.53	27239.83	27602.74	26907.1	31727.1		715.7	718.5	13070.67	11641.67	11584.03	11621.74	11580.41	12309.86	11580.28	12277.78	11603.38	11580.15	13138.09		945.7	948.5	41816.67	41694.83
	--									--								845.6	848.4	31773.78	26876.56	26899.71	29982.48	26936.69	26855.57	26855.72	27232.53	27719.54	26850.38	31406.15		715.6	718.4	13038.67	11624.44	11569.74	11608.64	11566.23	12344.7	11566.1	12209.74	11590.34	11565.97	13118.13		945.6	948.4	41683.07	41694.68
	--									--								845.5	848.3	31527.56	26822.42	26846.16	29502.88	26879.17	26800.99	26801.13	27234.4	27860.62	26795.86	31176.73		715.5	718.3	13182.67	11605.92	11553.92	11594.04	11550.5	12375.92	11550.38	12140.1	11575.87	11550.25	13094.89		945.5	948.3	41745.2	41693.76
	--									--								845.4	848.2	31474.67	26768.26	26792.62	29078.69	26821.8	26746.4	26746.52	27243.77	28019.26	26741.33	31028.01		715.4	718.2	13051.56	11588.74	11539.23	11580.62	11535.9	12405.3	11535.78	12072.38	11562.63	11535.65	13071.01		945.4	948.2	41554.93	41691.39
	--									--								845.3	848.1	31421.33	26714.1	26739.09	28704.9	26764.56	26691.79	26691.9	27261.13	28184.67	26686.78	30944.65		715.3	718.1	13155.56	11570.65	11523.39	11566.09	11520.15	12429.11	11520.03	12005.19	11548.38	11519.9	13043.66		945.3	948.1	41695.2	41691.32
	--									--								845.2	848	31258.22	26661.21	26686.86	28377.61	26708.72	26638.45	26638.54	27288.16	28347.14	26633.5	30912.2		715.2	718	12993.78	11554.15	11508.97	11553.04	11505.81	12449.62	11505.69	11941.63	11535.73	11505.57	13015.64		945.2	948	41698.93	41691.17
	--									--								845.1	847.9	31048	26610.16	26636.5	28092.26	26654.84	26586.94	26587.02	27325.74	28493.46	26582.05	30912.57		715.1	717.9	13040.89	11537.2	11493.96	11539.44	11490.88	12464.16	11490.76	11880.15	11522.65	11490.64	12984.7		945.1	947.9	41721.73	41690.61
	--									--								845	847.8	30899.11	26560.26	26587.3	27843.2	26602.21	26536.57	26536.63	27373.32	28607.7	26531.73	30925.05		715	717.8	12906.67	11521.54	11480.11	11527.06	11477.11	12473.89	11476.99	11822.85	11510.94	11476.88	12952.37		945	947.8	41644.4	41689.86
	--									--								844.9	847.7	30572	26513.59	26541.36	27627.87	26552.92	26489.42	26489.47	27432.98	28681.5	26484.64	30936.62		714.9	717.7	12666.22	11508.2	11468.47	11516.93	11465.54	12479.41	11465.43	11771.02	11501.67	11465.31	12919.49		944.9	947.7	41697.73	41699.67
	--									--								844.8	847.6	30934.22	26462.15	26490.69	27433.98	26498.96	26437.51	26437.55	27497.46	28697.55	26432.78	30926.38		714.8	717.6	12682.22	11494.73	11456.56	11506.62	11453.71	12477.87	11453.59	11722.32	11492.39	11453.48	12883.44		944.8	947.6	41639.07	41641.03
	--									--								844.7	847.5	30692.89	26412.94	26442.27	27264.63	26447.31	26387.8	26387.83	27572.47	28651.63	26383.13	30884.98		714.7	717.5	12752.89	11480.55	11443.85	11495.58	11441.07	12468.52	11440.96	11676.25	11482.72	11440.84	12843.58		944.7	947.5	41734.53	41736.52
	--									--								844.6	847.4	30504.89	26365.35	26395.51	27115.76	26397.37	26339.71	26339.72	27656.25	28548.51	26335.09	30812.56		714.6	717.4	12586.22	11467.96	11432.65	11486.11	11429.93	12453.22	11429.82	11635.06	11474.95	11429.71	12801.74		944.6	947.4	41627.87	41629.88
	--									--								844.5	847.3	30365.33	26318.84	26349.85	26983.81	26348.58	26292.68	26292.68	27747.2	28391.92	26288.12	30708.75		714.5	717.3	12492	11456.25	11422.25	11477.51	11419.6	12430.85	11419.49	11597.97	11468.47	11419.38	12756.74		944.5	947.3	41666.67	41668.71
	--									--								844.4	847.2	30384	26271.57	26303.47	26864.33	26299.1	26244.89	26244.88	27842.15	28185.75	26240.38	30573.5		714.4	717.2	12644.44	11443.04	11410.27	11467.42	11407.68	12400.2	11407.58	11562.42	11460.93	11407.47	12707.27		944.4	947.2	41794.4	41796.47
	--									--								844.3	847.1	30400.89	26223.56	26256.38	26755.08	26248.95	26196.35	26196.33	27939.53	27944.39	26191.88	30417.37		714.3	717.1	12519.11	11431.01	11399.4	11458.53	11396.87	12364.34	11396.77	11530.88	11455.13	11396.66	12656.32		944.3	947.1	41638.93	41709.18
	--									--								844.2	847	30199.11	26177.34	26211.12	26656.71	26200.65	26149.6	26149.57	28040.07	27684.74	26145.18	30253.54		714.2	717	12554.22	11418.6	11388.08	11449.29	11385.62	12322.25	11385.51	11501.59	11449.67	11385.4	12602.79		944.2	947	41689.6	41709.06
	--									--								844.1	846.9	30288.44	26129.56	26164.33	26564.27	26150.83	26101.26	26101.22	28138.37	27416.08	26096.89	30087.69		714.1	716.9	12376.89	11407.86	11378.38	11441.78	11375.97	12276.59	11375.87	11476.4	11446.89	11375.76	12549.39		944.1	946.9	41532.53	41707.65
	--									--								844	846.8	30204.44	26082.2	26118.01	26478.62	26101.5	26053.34	26053.28	28234.07	27153.57	26049.01	29931.5		714	716.8	12395.11	11396.9	11368.42	11434.09	11366.06	12226.16	11365.95	11453.25	11444.89	11365.85	12494.77		944	946.8	41600	41706.81
	--									--								843.9	846.7	30000	26036.68	26073.56	26399.94	26054.05	26007.24	26007.18	28325.22	26907.74	26002.96	29790.86		713.9	716.7	12441.78	11385.45	11357.9	11425.98	11355.59	12171.43	11355.49	11431.45	11443.54	11355.39	12439.11		943.9	946.7	41661.47	41706.49
	--									--								843.8	846.6	29857.78	25992.29	26030.3	26326.51	26007.77	25962.26	25962.19	28409.05	26683.86	25958.03	29668		713.8	716.6	12294.22	11375.39	11348.72	11419.32	11346.46	12114.93	11346.36	11412.65	11444.91	11346.26	12384.9		943.8	946.6	41598.67	41705.65
	--									--								843.7	846.5	29691.56	25949.33	25988.52	26257.92	25962.96	25918.7	25918.63	28483.51	26487.86	25914.52	29565.79		713.7	716.5	12224.89	11365.95	11340.12	11413.41	11337.92	12056.89	11337.82	11395.88	11448.41	11337.72	12332.36		943.7	946.5	41599.47	41704.82
	--									--								843.6	846.4	29745.78	25905.24	25945.66	26191.05	25917.07	25874	25873.92	28543.79	26316.51	25869.87	29478.18		713.6	716.4	12397.33	11354.79	11329.77	11405.89	11327.61	11996.02	11327.51	11378.6	11452.39	11327.41	12280.67		943.6	946.4	41628.53	41704.25
	--									--								843.5	846.3	29776.44	25860.29	25901.98	26125.71	25870.34	25828.43	25828.33	28588.07	26168.33	25824.33	29401.16		713.5	716.3	12351.56	11344.02	11319.76	11398.88	11317.65	11935.17	11317.55	11362.73	11458.95	11317.46	12232.51		943.5	946.3	41623.2	41703.63
	--									--								843.4	846.2	29365.33	25819.62	25862.64	26066.73	25827.92	25787.11	25787.01	28619.67	26046.83	25783.06	29336.11		713.4	716.2	12279.56	11333.88	11310.36	11392.64	11308.29	11875.28	11308.2	11348.37	11468.49	11308.1	12188.8		943.4	946.2	41631.87	41703.1
	--									--								843.3	846.1	29280.89	25779.46	25823.88	26010.07	25786.05	25746.3	25746.19	28633.26	25945.17	25742.29	29274.33		713.3	716.1	12316	11323.35	11300.52	11386.15	11298.49	11815.92	11298.4	11334.33	11480.22	11298.3	12149.24		943.3	946.1	41636.53	41702.6
	--									--								843.2	846	29297.33	25738.66	25784.52	25954.28	25743.55	25704.83	25704.71	28626.47	25857.56	25700.86	29208.57		713.2	716	12244	11313.44	11291.28	11380.46	11289.29	11758.68	11289.2	11321.53	11495.43	11289.11	12115.58		943.2	946	41561.87	41701.5
	--									--								843.1	845.9	29092	25699.77	25747.16	25901.7	25703	25665.26	25665.14	28598.98	25783.59	25661.33	29135.27		713.1	715.9	12192.44	11303.98	11282.45	11375.48	11280.51	11703.85	11280.42	11309.68	11514.49	11280.32	12088.59		943.1	945.9	41565.07	41700.43
	--									--								843	845.8	28828.44	25663.52	25712.5	25852.84	25665.09	25628.31	25628.18	28552.09	25721.88	25624.42	29053.46		713	715.8	12261.33	11293.79	11272.87	11369.99	11270.97	11650.89	11270.88	11297.53	11537.02	11270.78	12068.43		943	945.8	41604.93	41699.7
	--									--								842.9	845.7	28793.78	25627.26	25677.89	25804.92	25627.2	25591.33	25591.19	28484.57	25666.54	25587.48	28958.54		712.9	715.7	12239.11	11283.75	11263.41	11364.9	11261.55	11600.99	11261.46	11285.86	11563.48	11261.37	12055.82		942.9	945.7	41651.33	41699.36
	--									--								842.8	845.6	28623.56	25592.57	25644.94	25759.39	25590.9	25555.9	25555.76	28398.7	25617.47	25552.09	28850.98		712.8	715.6	12306.67	11272.99	11253.21	11359.38	11251.38	11553.25	11251.29	11273.76	11593.21	11251.21	12050.04		942.8	945.6	41663.47	41699.13
	--									--								842.7	845.5	28669.33	25556.95	25611.16	25713.67	25553.67	25519.53	25519.38	28293.1	25571.01	25515.76	28728.15		712.7	715.5	12364	11261.6	11242.35	11353.54	11240.56	11507.84	11240.47	11261.27	11626.48	11240.39	12051.43		942.7	945.5	41691.73	41699.13
	--									--								842.6	845.4	28507.56	25522.81	25578.94	25670.09	25517.95	25484.62	25484.47	28171.61	25528.46	25480.89	28592.72		712.6	715.4	12349.33	11250.27	11231.53	11348.19	11229.78	11465.5	11229.69	11249.03	11664.14	11229.6	12060.9		942.6	945.4	41732.4	41698.87
	--									--								842.5	845.3	28328.44	25490.38	25548.52	25628.78	25483.93	25451.39	25451.24	28036.24	25489.26	25447.7	28445.82		712.5	715.3	12262.22	11239.7	11221.46	11344.11	11219.74	11426.88	11219.65	11237.69	11707.98	11219.56	12080.27		942.5	945.3	41747.47	41698.49
	--									--								842.4	845.2	28134.67	25459.84	25520.09	25589.89	25451.81	25420.04	25419.88	27889.18	25453.14	25416.38	28289.18		712.4	715.2	12378.22	11227.92	11210.16	11339.36	11208.47	11389.93	11208.38	11225.28	11755.34	11208.3	12106.77		942.4	945.2	41745.07	41698.12
	--									--								842.3	845.1	27942.22	25431.19	25493.67	25553.37	25421.6	25390.56	25390.4	27732.53	25419.85	25386.95	28124.56		712.3	715.1	12508.44	11214.8	11197.48	11333.85	11195.82	11354.4	11195.74	11211.61	11805.68	11195.65	12139.8		942.3	945.1	41653.07	41697.81
	--									--								842.2	845	27738.67	25404.6	25469.41	25519.33	25393.44	25363.12	25362.95	27568.23	25389.25	25359.54	27953.57		712.2	715	12402.22	11202.6	11185.72	11329.95	11184.09	11322.69	11184	11198.96	11861.11	11183.92	12181.66		942.2	945	41743.2	41697.46
	--									--								842.1	844.9	27615.56	25379.15	25446.41	25486.83	25366.42	25336.79	25336.61	27399.3	25360.26	25333.24	27779.08		712.1	714.9	12438.22	11189.95	11173.49	11326.35	11171.89	11293.02	11171.81	11185.93	11920	11171.73	12230.35		942.1	944.9	41853.47	41696.17
	--									--								842	844.8	27681.78	25352.64	25422.48	25453.62	25338.35	25309.38	25309.2	27225.91	25330.6	25305.87	27601.11		712	714.8	12549.33	11176.11	11160.06	11322.68	11158.5	11264.32	11158.41	11171.79	11981.5	11158.33	12285.06		942	944.8	41799.73	41695.33
	--									--								841.9	844.7	27482.22	25328.16	25400.72	25422.76	25312.31	25283.98	25283.79	27053.37	25303.25	25280.5	27424.83		711.9	714.7	12559.56	11162.07	11146.41	11319.93	11144.87	11237.36	11144.79	11157.48	12046.27	11144.71	12346.23		941.9	944.7	41908.8	41693.56
	--									--								841.8	844.6	27284.89	25305.71	25381.16	25394.21	25288.29	25260.59	25260.4	26883.74	25278.14	25257.14	27252.25		711.8	714.6	12516.44	11148.33	11133.04	11318.74	11131.53	11212.47	11131.45	11143.52	12113.43	11131.37	12412.92		941.8	944.6	41887.07	41691.96
	--									--								841.7	844.5	27043.11	25285.84	25364.33	25368.5	25266.84	25239.74	25239.54	26719.43	25255.78	25236.32	27085.74		711.7	714.5	12674.22	11132.94	11118.01	11317.39	11116.53	11187.49	11116.45	11127.94	12180.31	11116.37	12482.48		941.7	944.5	41766.13	41691.37
	--									--								841.6	844.4	26983.56	25266.45	25348.16	25343.51	25245.85	25219.34	25219.14	26560.01	25234.06	25215.96	26924.81		711.6	714.4	12685.33	11117.3	11102.73	11317.52	11101.27	11163.66	11101.19	11112.16	12247.53	11101.11	12555.56		941.6	944.4	41838	41690.17
	--									--								841.5	844.3	26915.11	25247.64	25332.77	25319.33	25225.45	25199.5	25199.3	26406.99	25213.03	25196.16	26770.92		711.5	714.3	12858.22	11099.85	11085.61	11317.98	11084.18	11139.22	11084.1	11094.58	12312.65	11084.03	12630		941.5	944.3	41916.8	41688.29
	--									--								841.4	844.2	26918.22	25228.6	25317.33	25295.1	25204.8	25179.4	25179.19	26261.35	25191.86	25176.08	26625.05		711.4	714.2	12736.89	11083.43	11069.52	11322.45	11068.11	11117	11068.03	11078.05	12377.01	11067.96	12707.9		941.4	944.2	41983.07	41685.85
	--									--								841.3	844.1	26640	25212.6	25305.15	25274.1	25187.17	25162.31	25162.1	26127.28	25173.81	25159.02	26491.37		711.3	714.1	12834.67	11065.91	11052.31	11328.81	11050.93	11094.55	11050.85	11060.45	12437.2	11050.78	12785.57		941.3	944.1	42006.27	41683.19
	--									--								841.2	844	26672.89	25196.05	25292.66	25252.71	25168.98	25144.63	25144.42	26001.18	25155.27	25141.38	26366.26		711.2	714	12906.22	11047.55	11034.24	11337.78	11032.89	11072	11032.81	11042.01	12492.54	11032.74	12862.66		941.2	944	42079.33	41679.9
	--									--								841.1	843.9	26577.78	25180.43	25281.35	25232.42	25151.71	25127.86	25127.64	25884.79	25137.71	25124.64	26251.47		711.1	713.9	12926.67	11028.81	11015.8	11350.4	11014.47	11049.71	11014.4	11023.22	12542.52	11014.32	12939.08		941.1	943.9	42111.2	41676.32
	--									--								841	843.8	26470.67	25165.91	25271.41	25213.34	25135.51	25112.14	25111.92	25778.33	25121.28	25108.95	26147.2		711	713.8	12951.11	11009.67	10996.95	11367.21	10995.64	11027.55	10995.56	11004.04	12586.11	10995.49	13014.3		941	943.8	41964.93	41673.93
	--									--								840.9	843.7	26288	25153.37	25263.74	25196.38	25121.26	25098.37	25098.15	25682.56	25106.86	25095.21	26054.25		710.9	713.7	12996.89	10989.91	10977.46	11389.81	10976.18	11005.22	10976.1	10984.26	12621.62	10976.03	13088.36		940.9	943.7	41966.67	41671.51
	--									--								840.8	843.6	26201.78	25141.71	25257.31	25180.4	25107.88	25085.44	25085.22	25596.14	25093.34	25082.31	25971.29		710.8	713.6	13080	10969.17	10956.98	11418.64	10955.72	10982.29	10955.64	10963.49	12646.17	10955.57	13159.1		940.8	943.6	41940.27	41669.29
	--									--								840.7	843.5	26018.67	25132.08	25253.28	25166.56	25096.49	25074.5	25074.27	25519.82	25081.85	25071.39	25899.09		710.7	713.5	13128.44	10947.76	10935.83	11454.41	10934.59	10959.02	10934.51	10942.07	12660.96	10934.44	13228.05		940.7	943.5	41892.13	41667.46
	--									--								840.6	843.4	26130.67	25121.05	25248.25	25151.41	25083.69	25062.12	25061.9	25449.71	25068.98	25059.05	25833.77		710.6	713.4	13238.22	10925.09	10913.41	11497.51	10912.19	10934.79	10912.11	10919.4	12664.84	10912.04	13295.04		940.6	943.4	41973.6	41664.93
	--									--								840.5	843.3	25994.22	25111.52	25245.15	25137.84	25072.34	25051.2	25050.97	25389.1	25057.59	25048.15	25778.65		710.5	713.3	13348	10901.14	10889.7	11549.02	10888.5	10909.5	10888.43	10895.45	12657.39	10888.36	13360.62		940.5	943.3	41970	41662.42
	--									--								840.4	843.2	25976	25102.12	25242.65	25124.46	25061.09	25040.35	25040.12	25334.88	25046.32	25037.33	25730.65		710.4	713.2	13370.22	10876.76	10865.55	11610.9	10864.37	10883.95	10864.29	10871.07	12639.12	10864.23	13426.43		940.4	943.2	41988.27	41659.73
	--									--								840.3	843.1	25691.11	25095.96	25243.91	25114.39	25053.04	25032.71	25032.47	25289.55	25038.28	25029.71	25692.32		710.3	713.1	13465.78	10851.22	10840.24	11687.58	10839.07	10857.39	10839	10845.55	12607.09	10838.93	13494.6		940.3	943.1	42014.4	41656.79
	--									--								840.2	843	25576.89	25091.09	25247.05	25105.68	25046.26	25026.3	25026.07	25250.56	25031.51	25023.34	25661.16		710.2	713	13620.44	10823.93	10813.17	11776.81	10812.02	10829.21	10811.95	10818.28	12562.09	10811.89	13564.27		940.2	943	41976.93	41654.16
	--									--								840.1	842.9	25517.33	25086.9	25251.51	25097.68	25040.1	25020.52	25020.28	25216.72	25025.39	25017.58	25636.04		710.1	712.9	13658.22	10796.02	10785.48	11881.02	10784.34	10800.52	10784.27	10790.4	12506.49	10784.21	13639.08		940.1	942.9	41919.07	41651.98
	--									--								840	842.8	25667.56	25080.94	25254.93	25087.95	25032.13	25012.92	25012.68	25185.06	25017.47	25010	25614.06		710	712.8	13858.67	10765.9	10755.56	11999.94	10754.45	10769.72	10754.38	10760.3	12439.15	10754.32	13719.19		940	942.8	41843.87	41650.42
	--									--								839.9	842.7	25492	25077	25261.18	25080.27	25026.13	25007.27	25007.03	25158.84	25011.54	25004.39	25598.56		709.9	712.7	13962.67	10734.49	10724.35	12135.74	10723.25	10737.7	10723.18	10728.92	12361.59	10723.12	13807.37		939.9	942.7	41832.27	41648.95
	--									--								839.8	842.6	25419.11	25073.91	25269.31	25073.46	25020.93	25002.41	25002.17	25136.41	25006.4	24999.55	25588.14		709.8	712.6	14046.67	10701.96	10692.01	12291.97	10690.93	10704.64	10690.87	10696.42	12274.3	10690.8	13907.48		939.8	942.6	41909.33	41646.82
	--									--								839.7	842.5	25359.11	25071.52	25279.28	25067.36	25016.38	24998.2	24997.95	25117.37	25001.93	24995.36	25582.47		709.7	712.5	14163.11	10667.99	10658.23	12471.39	10657.17	10670.2	10657.1	10662.49	12176.95	10657.04	14022.24		939.7	942.5	41926.4	41644.53
	--									--								839.6	842.4	25262.67	25070.28	25291.71	25062.42	25012.91	24995.06	24994.81	25101.72	24998.56	24992.25	25581.73		709.6	712.4	14470.67	10630.71	10621.14	12669.45	10620.09	10632.5	10620.02	10625.25	12070.53	10619.96	14149.96		939.6	942.4	41931.73	41642.18
	--									--								839.5	842.3	25133.78	25070.57	25307.21	25059.01	25010.92	24993.38	24993.13	25089.33	24996.66	24990.6	25586.03		709.5	712.3	14574.67	10592.06	10582.67	12888.6	10581.64	10593.47	10581.57	10586.64	11957.98	10581.51	14294.07		939.5	942.3	41958.27	41639.58
	--									--								839.4	842.2	25218.22	25069.93	25323.57	25054.66	25007.93	24990.71	24990.46	25077.45	24993.77	24987.94	25592.88		709.4	712.2	14750.22	10551.34	10542.12	13128.36	10541.1	10552.41	10541.04	10545.95	11839.61	10540.97	14455.11		939.4	942.2	41933.6	41637.18
	--									--								839.3	842.1	25346.67	25067.85	25340.54	25048.85	25003.42	24986.5	24986.25	25065.33	24989.37	24983.76	25601.77		709.3	712.1	14868	10509.08	10500.03	13389.25	10499.03	10509.84	10498.96	10503.74	11716.97	10498.9	14634.59		939.3	942.1	41971.07	41634.45
	--									--								839.2	842	24960.44	25069.76	25363.87	25047.01	25002.84	24986.21	24985.96	25058.21	24988.9	24983.5	25618.28		709.2	712	15115.11	10464.01	10455.13	13673.84	10454.14	10464.5	10454.08	10458.72	11589.77	10454.02	14836.06		939.2	942	41998.93	41631.46
	--									--								839.1	841.9	24991.11	25071.93	25390.23	25045.41	25002.44	24986.1	24985.85	25052.17	24988.62	24983.41	25638.89		709.1	711.9	15503.11	10414.74	10406.02	13976.18	10405.05	10414.97	10404.98	10409.49	11458.17	10404.92	15055.14		939.1	941.9	41846.67	41629.72
	--									--								839	841.8	24998.67	25089.55	25435.33	25059.21	25017.39	25001.34	25001.08	25062.26	25003.69	24998.67	25679.17		709	711.8	15615.56	10363.91	10355.34	14295.51	10354.38	10363.91	10354.32	10358.7	11325.8	10354.26	15292.05		939	941.8	42100	41625.85
	--									--								838.9	841.7	24939.11	25032.45	25409.63	24998.24	24957.54	24941.76	24941.5	24998.17	24943.96	24939.11	25649.47		708.9	711.7	15956.89	10309.27	10300.85	14627.34	10299.9	10309.06	10299.84	10304.11	11191.16	10299.78	15543.05		938.9	941.7	42011.87	41622.69
	--									--								838.8	841.6	24900.89	24996.78	25410.75	24958.66	24919.03	24903.51	24903.26	24956.02	24905.57	24900.89	25647.36		708.8	711.6	16163.56	10252.09	10243.82	14970.29	10242.89	10251.69	10242.82	10246.98	11056.23	10242.77	15807.44		938.8	941.6	41954.8	41619.98
	--									--								838.7	841.5	24901.33	25046.86	25503.61	25004.76	24966.16	24950.91	24950.65	24999.94	24952.83	24948.3	25737.58		708.7	711.5	16394.22	10192.12	10183.99	15321.14	10183.07	10191.55	10183.01	10187.05	10921.52	10182.95	16082.77		938.7	941.5	41891.2	41617.79
	--									--								838.6	841.4	25043.56	25049.05	25555.69	25002.91	24965.3	24950.3	24950.04	24996.22	24952.09	24947.72	25787.58		708.6	711.4	16720.89	10128.4	10120.4	15674.66	10119.5	10127.66	10119.44	10123.38	10787.46	10119.38	16365.21		938.6	941.4	42066.93	41614.11
	--									--								838.5	841.3	25092	25051.06	25616.11	25000.79	24964.14	24949.39	24949.13	24992.52	24951.06	24946.83	25846.4		708.5	711.3	16860	10062.7	10054.85	16025.56	10053.96	10061.83	10053.9	10057.74	10655.43	10053.84	16649.06		938.5	941.3	41893.33	41611.86
	--									--								838.4	841.2	24966.22	25053.97	25687.6	24999.49	24963.76	24949.25	24948.98	24989.86	24950.8	24946.71	25916.76		708.4	711.2	17010.67	9994.916	9987.193	16368.9	9986.315	9993.903	9986.256	9989.995	10525.52	9986.2	16929.6		938.4	941.2	42002.67	41608.67
	--									--								838.3	841.1	24952.44	25057.1	25771.42	24998.31	24963.47	24949.19	24948.93	24987.53	24950.64	24946.67	25999.88		708.3	711.1	17368	9922.998	9915.405	16697.66	9914.539	9921.864	9914.48	9918.125	10395.86	9914.425	17199.96		938.3	941.1	41973.87	41605.71
	--									--								838.2	841	24936.44	25060.35	25869.71	24997.14	24963.15	24949.11	24948.84	24985.39	24950.45	24946.61	26097.88		708.2	711	17451.56	9849.573	9842.106	17009.33	9841.252	9848.329	9841.194	9844.749	10269.16	9841.139	17457.71		938.2	941	42080.53	41601.83
	--									--								838.1	840.9	24948	25063.81	25985.12	24996.06	24962.9	24949.08	24948.81	24983.47	24950.33	24946.6	26213.37		708.1	710.9	17511.56	9774.856	9767.512	17295	9766.67	9773.511	9766.612	9770.08	10146.42	9766.558	17694.75		938.1	940.9	42143.07	41597.4
	--									--								838	840.8	25080.44	25066.62	26119.69	24994.2	24961.83	24948.23	24947.97	24980.91	24949.39	24945.78	26348.41		708	710.8	17682.22	9697.758	9690.533	17545.26	9689.702	9696.319	9689.645	9693.03	10026.08	9689.592	17901.18		938	940.8	42087.87	41593.4
	--									--								837.9	840.7	25222.22	25068.72	26276.82	24991.49	24959.89	24946.51	24946.24	24977.61	24947.58	24944.07	26506.36		707.9	710.7	17922.22	9617.58	9610.473	17757.71	9609.653	9616.057	9609.596	9612.9	9906.82	9609.543	18073.99		937.9	940.7	42012.53	41590
	--									--								837.8	840.6	25379.56	25070.03	26463.81	24987.83	24956.98	24943.8	24943.53	24973.44	24944.79	24941.38	26694.52		707.8	710.6	18152	9534.393	9527.4	17927.99	9526.591	9532.792	9526.535	9529.761	9788.522	9526.483	18208.61		937.8	940.6	41927.73	41587.29
	--									--								837.7	840.5	25608.44	25070.11	26681.55	24982.77	24952.64	24939.67	24939.4	24967.94	24940.58	24937.27	26913.77		707.7	710.5	18232	9449.624	9442.742	18053.52	9441.944	9447.952	9441.888	9445.039	9672.4	9441.836	18302.25		937.7	940.5	42009.33	41583.88
	--									--								837.6	840.4	25811.56	25069.12	26934.57	24976.47	24947.02	24934.25	24933.99	24961.26	24935.09	24931.88	27168.64		707.6	710.4	18260	9363.762	9356.989	18131.21	9356.202	9362.025	9356.146	9359.225	9558.814	9356.095	18351.71		937.6	940.4	41928.4	41581.12
	--									--								837.5	840.3	25994.22	25067.21	27227.59	24969.02	24940.25	24927.68	24927.41	24953.51	24928.45	24925.32	27463.87		707.5	710.3	18319.56	9276.491	9269.823	18145.32	9269.047	9274.695	9268.991	9272	9447.777	9268.941	18341.56		937.5	940.3	42006.93	41577.69
	--									--								837.4	840.2	26287.56	25063.69	27564.62	24959.76	24931.64	24919.26	24918.99	24943.98	24919.96	24916.92	27803.46		707.4	710.2	18401.78	9187.575	9181.011	18103	9180.245	9185.726	9180.19	9183.131	9337.915	9180.14	18277.81		937.4	940.2	41842.93	41575.62
	--									--								837.3	840.1	26751.11	25057.53	27949.26	24947.61	24920.12	24907.92	24907.66	24931.61	24908.56	24905.6	28191.04		707.3	710.1	18395.11	9097.863	9091.401	18006.61	9090.644	9095.965	9090.59	9093.466	9229.825	9090.54	18162.59		937.3	940.1	41874	41573.27
	--									--								837.2	840	27142.67	25049.16	28386.45	24933	24906.12	24894.11	24893.84	24916.81	24894.68	24891.8	28631.54		707.2	710	18396.44	9007.269	9000.906	17856.29	9000.159	9005.328	9000.105	9002.918	9123.176	9000.056	17995.76		937.2	940	41768	41571.8
	--									--								837.1	839.9	27789.78	25037.03	28878.73	24914.33	24888.04	24876.21	24875.94	24898.01	24876.73	24873.93	29127.54		707.1	709.9	18183.11	8917.873	8911.606	17654.99	8910.869	8915.891	8910.815	8913.568	9019.812	8910.766	17780.06		937.1	939.9	41821.2	41569.88
	--									--								837	839.8	28460	25020.99	29429.54	24891.45	24865.73	24854.07	24853.8	24875.01	24854.53	24851.8	29682.49		707	709.8	17928.44	8830.087	8823.914	17401.85	8823.186	8828.068	8823.134	8825.827	8920.181	8823.085	17514.65		937	939.8	41788.93	41568.23
	--									--								836.9	839.7	28937.33	25002.22	30044.5	24865.5	24840.33	24828.85	24828.58	24848.98	24829.26	24826.6	30302.01		706.9	709.7	17712.89	8743.546	8737.466	17093.42	8736.748	8741.495	8736.695	8739.331	8823.508	8736.647	17195.68		936.9	939.7	41804.93	41566.43
	--									--								836.8	839.6	29553.78	24979.89	30730.01	24835.62	24810.99	24799.67	24799.4	24819.04	24800.03	24797.44	30992.56		706.8	709.6	17401.78	8659.192	8653.203	16745.26	8652.493	8657.111	8652.441	8655.022	8730.351	8652.393	16838.32		936.8	939.6	41648.67	41565.95
	--									--								836.7	839.5	30660	24950.97	31476.09	24798.75	24774.64	24763.49	24763.22	24782.13	24763.8	24761.28	31744.16		706.7	709.5	16772.89	8580.136	8574.235	16364.76	8573.535	8578.03	8573.483	8576.01	8643.661	8573.436	16449.8		936.7	939.5	41693.33	41565.09
	--									--								836.6	839.4	31756.89	24915.53	32280.99	24754.91	24731.31	24720.32	24720.05	24738.27	24720.58	24718.12	32555.12		706.6	709.4	16377.33	8504.161	8498.346	15954.32	8497.654	8502.031	8497.603	8500.078	8561.074	8497.556	16032.38		936.6	939.4	41730.67	41563.93
	--									--								836.5	839.3	32836	24873.67	33141.21	24704.17	24681.06	24670.22	24669.96	24687.53	24670.45	24668.04	33421.95		706.5	709.3	15505.33	8435.929	8430.198	15523.5	8429.515	8433.778	8429.464	8431.888	8487.134	8429.418	15595.49		936.5	939.3	41670	41563.27
	--									--								836.4	839.2	34012.44	24824.79	34050.54	24645.88	24623.24	24612.56	24612.29	24629.25	24612.74	24610.4	34338.5		706.4	709.2	14806.67	8373.829	8368.181	15073.44	8367.506	8371.66	8367.456	8369.831	8420.246	8367.41	15140.28		936.4	939.2	41738	41562.06
	--									--								836.3	839.1	35163.56	24769.06	35001.49	24580.15	24557.97	24547.45	24547.18	24563.55	24547.59	24545.3	35297.35		706.3	709.1	13888	8320.061	8314.494	14615.53	8313.827	8317.876	8313.777	8316.105	8362.287	8313.732	14677.83		936.3	939.1	41771.6	41560.56
	--									--								836.2	839	36552.44	24705.03	35982.84	24505.47	24483.74	24473.36	24473.09	24488.91	24473.46	24471.23	36287.3		706.2	709	13129.78	8273.145	8267.657	14155.82	8266.999	8270.946	8266.949	8269.231	8311.701	8266.904	14214.12		936.2	939	41711.73	41559.58
	--									--								836.1	838.9	37727.11	24634.04	36984.07	24423.1	24401.8	24391.57	24391.3	24406.6	24391.64	24389.46	37297.92		706.1	708.9	12268	8234.155	8228.745	13700.26	8228.094	8231.944	8228.045	8230.283	8269.489	8228	13755.02		936.1	938.9	41632.27	41559.26
	--									--								836	838.8	39127.11	24554.72	37989.97	24331.61	24310.73	24300.64	24300.37	24315.16	24300.67	24298.54	38314.09		706	708.8	11496	8202.295	8196.961	13252.7	8196.318	8200.073	8196.269	8198.463	8234.794	8196.224	13304.3		936	938.8	41654.67	41558.78
	--									--								835.9	838.7	40557.78	24466.93	38983.88	24230.74	24210.27	24200.33	24200.06	24214.37	24200.33	24198.24	39319.21		705.9	708.7	10903.11	8175.893	8170.632	12815.81	8169.997	8173.662	8169.949	8172.101	8205.931	8169.905	12864.65		935.9	938.7	41570.4	41559.01
	--									--								835.8	838.6	41728.44	24372.33	39945.74	24122.05	24101.98	24092.17	24091.9	24105.76	24092.14	24090.1	40293.35		705.8	708.6	10195.11	8156.12	8150.932	12398.7	8150.305	8153.883	8150.257	8152.368	8183.994	8150.213	12445.07		935.8	938.6	41607.6	41558.96
	--									--								835.7	838.5	42844.89	24271.33	40857.59	24005.82	23986.14	23976.46	23976.19	23989.61	23976.4	23974.41	41218.68		705.7	708.5	9727.111	8140.708	8135.592	12000.79	8134.971	8138.465	8134.923	8136.995	8166.641	8134.88	12044.92		935.7	938.5	41598.53	41559
	--									--								835.6	838.4	43656.89	24165.92	41702.48	23883.88	23864.57	23855.03	23854.76	23867.76	23854.94	23852.99	42078.4		705.6	708.4	9485.778	8127.496	8122.448	11622.24	8121.835	8125.248	8121.788	8123.821	8151.681	8121.745	11664.35		935.6	938.4	41592.4	41559.12
	--									--								835.5	838.3	44521.78	24055.94	42461.51	23755.87	23736.93	23727.51	23727.24	23739.84	23727.39	23725.49	42853.81		705.5	708.3	9174.222	8117.186	8112.207	11265.78	8111.601	8114.936	8111.554	8113.55	8139.793	8111.512	11306.03		935.5	938.3	41575.47	41559.41
	--									--								835.4	838.2	44996.89	23944.02	43119.27	23624.15	23605.57	23596.28	23596.01	23608.23	23596.13	23594.27	43529.77		705.4	708.2	8917.778	8109.272	8104.36	10932.49	8103.761	8107.02	8103.714	8105.674	8130.451	8103.672	10971.04		935.4	938.2	41550.4	41559.94
	--									--								835.3	838.1	45439.56	23830.65	43659.5	23488.9	23470.67	23461.5	23461.23	23473.09	23461.33	23459.51	44090.32		705.3	708.1	8733.778	8103.072	8098.225	10624.97	8097.633	8100.819	8097.587	8099.511	8122.988	8097.545	10661.99		935.3	938.1	41408.27	41559.43
	--									--								835.2	838	45724	23717.23	44068.58	23351.08	23333.19	23324.14	23323.87	23335.38	23323.95	23322.16	44522.28		705.2	708	8736	8096.792	8092.01	10344.22	8091.425	8094.54	8091.379	8093.268	8115.555	8091.337	10379.83		935.2	938	41588.4	41559.71
	--									--								835.1	837.9	45799.11	23605.49	44335.55	23211.97	23194.4	23185.47	23185.2	23196.38	23185.26	23183.51	44815.16		705.1	707.9	8551.556	8092.247	8087.528	10087.91	8086.949	8089.996	8086.904	8088.759	8109.953	8086.863	10122.21		935.1	937.9	41447.07	41559.61
	--									--								835	837.8	45381.78	23498.91	44454.01	23074.58	23057.33	23048.52	23048.25	23059.11	23048.28	23046.57	44963		705	707.8	8461.778	8088.533	8083.875	9854.722	8083.303	8086.284	8083.258	8085.081	8105.265	8083.217	9887.8		935	937.8	41595.07	41559.91
	--									--								834.9	837.7	44866.67	23398.74	44409.03	22939.53	22922.6	22913.9	22913.63	22924.18	22913.64	22911.97	44951.5		704.9	707.7	8418.667	8085.203	8080.606	9643.608	8080.041	8082.958	8079.996	8081.787	8101.037	8079.956	9675.548		934.9	937.7	41470.13	41560.11
	--									--								834.8	837.6	44372.89	23305.74	44196.25	22806.71	22790.08	22781.5	22781.23	22791.48	22781.22	22779.58	44777.17		704.8	707.6	8343.556	8082.574	8078.036	9454.066	8077.477	8080.332	8077.433	8079.193	8097.583	8077.392	9484.947		934.8	937.6	41446.27	41560.18
	--									--								834.7	837.5	43444.89	23223.69	43831.56	22678.81	22662.48	22654	22653.74	22663.71	22653.71	22652.1	44457.01		704.7	707.5	8311.556	8080.232	8075.753	9288.185	8075.2	8077.995	8075.155	8076.885	8094.481	8075.116	9318.076		934.7	937.5	41503.73	41560.79
	--									--								834.6	837.4	42741.33	23152.59	43319.39	22554.48	22538.43	22530.06	22529.8	22539.49	22529.75	22528.17	43996.79		704.6	707.4	8240.444	8078.561	8074.138	9142.312	8073.592	8076.328	8073.548	8075.248	8092.099	8073.508	9171.269		934.6	937.4	41476.53	41561.25
	--									--								834.5	837.3	41494.22	23097.49	42672.06	22437.08	22421.31	22413.05	22412.79	22422.22	22412.72	22411.17	43410.51		704.5	707.3	8166.667	8077.592	8073.226	9013.605	8072.685	8075.365	8072.641	8074.313	8090.466	8072.602	9041.679		934.5	937.3	41520.4	41562.15
	--									--								834.4	837.2	40902.67	23056.43	41897.37	22322.62	22307.12	22298.97	22298.7	22307.88	22298.62	22297.1	42708		704.4	707.2	8237.778	8075.924	8071.613	8899.354	8071.078	8073.704	8071.035	8072.679	8088.176	8070.996	8926.591		934.4	937.2	41568	41563.06
	--									--								834.3	837.1	39963.11	23034.07	41011.71	22213.25	22198.03	22189.98	22189.71	22198.65	22189.61	22188.12	41908.16		704.3	707.1	8235.111	8074.268	8070.011	8798.96	8069.482	8072.055	8069.439	8071.055	8085.937	8069.401	8825.403		934.3	937.1	41533.33	41564.24
	--									--								834.2	837	39261.78	23031.99	40029.85	22107.56	22092.59	22084.64	22084.38	22093.08	22084.26	22082.8	41028.74		704.2	707	8270.667	8072.252	8068.048	8710.992	8067.524	8070.046	8067.482	8069.072	8083.381	8067.444	8736.692		934.2	937	41402.13	41564.45
	--									--								834.1	836.9	38405.33	23054.76	38970.38	22006.5	21991.79	21983.94	21983.67	21992.15	21983.54	21982.11	40091.96		704.1	706.9	8131.556	8071.571	8067.418	8637.924	8066.9	8069.372	8066.858	8068.422	8082.191	8066.82	8662.915		934.1	936.9	41499.07	41565.6
	--									--								834	836.8	37653.78	23106.03	37851.19	21909.47	21895	21887.25	21886.99	21895.25	21886.84	21885.43	39119.96		704	706.8	8190.222	8070.314	8066.212	8573.563	8065.7	8068.124	8065.658	8067.196	8080.454	8065.62	8597.878		934	936.8	41395.2	41566.03
	--									--								833.9	836.7	36987.56	23190.23	36688.93	21815.95	21801.73	21794.07	21793.81	21801.86	21793.65	21792.27	38134.35		703.9	706.7	8210.667	8068.847	8064.795	8517.242	8064.289	8066.666	8064.247	8065.761	8078.535	8064.21	8540.913		933.9	936.7	41558.27	41567.62
	--									--								833.8	836.6	36445.78	23312.31	35506.01	21725.22	21711.23	21703.67	21703.4	21711.25	21703.23	21701.88	37163.19		703.8	706.6	8202.222	8067.45	8063.448	8468.277	8062.947	8065.277	8062.905	8064.395	8076.71	8062.868	8491.332		933.8	936.6	41462.4	41568.97
	--									--								833.7	836.5	36012.89	23478.04	34321.2	21636.6	21622.85	21615.37	21615.11	21622.76	21614.93	21613.6	36231.69		703.7	706.5	8197.333	8066.088	8062.134	8425.744	8061.638	8063.925	8061.597	8063.063	8074.947	8061.561	8448.214		933.7	936.5	41445.6	41570.39
	--									--								833.6	836.4	35428.44	23695.46	33151.2	21551.05	21537.52	21530.14	21529.88	21537.34	21529.68	21528.37	35363.65		703.6	706.4	8001.778	8065.465	8061.558	8390.087	8061.068	8063.311	8061.027	8062.47	8073.946	8060.99	8412		933.6	936.4	41516	41572.66
	--									--								833.5	836.3	35120.89	23970.55	32008.34	21466.88	21453.57	21446.28	21446.02	21453.3	21445.81	21444.52	34579.07		703.5	706.3	8086.667	8065.163	8061.303	8359.951	8060.817	8063.019	8060.777	8062.198	8073.286	8060.741	8381.329		933.5	936.3	41581.87	41575.02
	--									--								833.4	836.2	34996.89	24310.3	30903.61	21382.97	21369.87	21362.66	21362.4	21369.51	21362.18	21360.92	33897.04		703.4	706.2	8093.778	8098.149	8094.334	8366.913	8093.854	8096.015	8093.814	8095.212	8105.931	8093.778	8387.778		933.4	936.2	41506	41577.93
	--									--								833.3	836.1	34790.67	24723.51	29847.54	21299.81	21286.93	21279.81	21279.55	21286.48	21279.32	21278.08	33336.4		703.3	706.1	8087.111	8091.432	8087.662	8337.479	8087.187	8089.308	8087.147	8088.524	8098.891	8087.111	8357.852		933.3	936.1	41492.67	41581.22
	--									--								833.2	836	34797.78	25217.03	28846.77	21216.11	21203.43	21196.39	21196.13	21202.91	21195.89	21194.68	32911.93		703.2	706	8118.222	8122.493	8118.768	8348.682	8118.297	8120.38	8118.257	8119.614	8129.645	8118.222	8368.582		933.2	936	41533.2	41585.43
	--									--								833.1	835.9	34646.67	25799.48	27908.13	21132.83	21120.35	21113.4	21113.14	21119.76	21112.89	21111.69	32638.12		703.1	705.9	8071.111	8075.334	8071.651	8284.123	8071.186	8073.231	8071.146	8072.482	8082.197	8071.111	8303.572		933.1	935.9	41419.73	41589.4
	--									--								833	835.8	34882.22	26475.15	27033.09	21047.6	21035.31	21028.44	21028.18	21034.64	21027.92	21026.75	32523.11		703	705.8	8222.222	8226.397	8222.757	8420.269	8222.296	8224.305	8222.257	8223.573	8232.986	8222.222	8439.285		933	935.8	41573.33	41594.86
	--									--								832.9	835.7	34888.44	27250.59	26231.32	20961.8	20949.71	20942.92	20942.66	20948.97	20942.39	20941.24	32581.72		702.9	705.7	8121.778	8125.905	8122.307	8306.594	8121.851	8123.825	8121.812	8123.109	8132.233	8121.778	8325.192		932.9	935.7	41629.87	41600.95
	--									--								832.8	835.6	35271.11	28126.57	25496.51	20873.13	20861.22	20854.51	20854.25	20860.42	20853.97	20852.84	32810.73		702.8	705.6	8123.556	8127.637	8124.08	8296.559	8123.628	8125.567	8123.59	8124.867	8133.715	8123.556	8314.754		932.8	935.6	41588.13	41608.76
	--									--								832.7	835.5	35390.22	29105.13	24826.27	20783.18	20771.46	20764.82	20764.56	20770.59	20764.28	20763.16	33208.17		702.7	705.5	8164.889	8168.925	8165.408	8327.306	8164.961	8166.866	8164.923	8166.181	8174.765	8164.889	8345.113		932.7	935.5	41654.67	41617.75
	--									--								832.6	835.4	35799.11	30181.69	24216.11	20690.16	20678.61	20672.05	20671.8	20677.69	20671.5	20670.41	33766.78		702.6	705.4	8080.444	8084.436	8080.959	8233.336	8080.516	8082.389	8080.478	8081.718	8090.05	8080.444	8250.77		932.6	935.4	41761.87	41628.21
	--									--								832.5	835.3	36197.33	31349.82	23662.59	20594.12	20582.75	20576.26	20576.01	20581.77	20575.7	20574.62	34476.65		702.5	705.3	8076.444	8080.392	8076.954	8220.765	8076.516	8078.356	8076.478	8077.7	8085.791	8076.444	8237.84		932.5	935.3	41694.4	41642.06
	--									--								832.4	835.2	36702.22	32598.31	23160.96	20494.37	20483.17	20476.76	20476.51	20482.14	20476.2	20475.14	35322.47		702.4	705.2	8037.778	8041.682	8038.282	8174.463	8037.849	8039.658	8037.811	8039.016	8046.876	8037.778	8191.192		932.4	935.2	41568.4	41660.4
	--									--								832.3	835.1	37095.11	33912.95	22707.43	20391.6	20380.57	20374.23	20373.97	20379.48	20373.66	20372.61	36285.62		702.3	705.1	8082.222	8086.083	8082.722	8211.942	8082.293	8084.071	8082.255	8083.443	8091.082	8082.222	8228.335		932.3	935.1	41745.73	41681.46
	--									--								832.2	835	37556.44	35274.14	22296.91	20285.35	20274.48	20268.21	20267.96	20273.35	20267.64	20266.61	37341.79		702.2	705	8079.556	8083.375	8080.051	8202.906	8079.625	8081.375	8079.588	8080.759	8088.185	8079.556	8218.975		932.2	935	41884.4	41706.42
	--									--								832.1	834.9	38088.89	36658.09	21924.23	20175.16	20164.46	20158.26	20158.01	20163.28	20157.68	20156.66	38462.52		702.1	704.9	8110.222	8114.001	8110.713	8227.728	8110.292	8112.012	8110.255	8111.409	8118.631	8110.222	8243.484		932.1	934.9	41882.13	41737.45
	--									--								832	834.8	38666.22	38037.5	21584.47	20060.75	20050.2	20044.07	20043.81	20048.98	20043.48	20042.48	39615.87		702	704.8	8025.778	8029.516	8026.264	8137.899	8025.847	8027.539	8025.81	8026.948	8033.976	8025.778	8153.353		932	934.8	41959.73	41774.97
	--									--								831.9	834.7	39241.78	39382.35	21276.18	19942.08	19931.68	19925.62	19925.37	19930.42	19925.03	19924.04	40770.41		701.9	704.7	8008	8011.698	8008.481	8115.19	8008.068	8009.733	8008.032	8009.154	8015.995	8008	8130.352		931.9	934.7	42056	41820.36
	--									--								831.8	834.6	39805.78	40660.65	20991.67	19819.2	19808.96	19802.96	19802.71	19807.66	19802.36	19801.4	41886.39		701.8	704.6	7993.333	7996.992	7993.81	8095.969	7993.401	7995.039	7993.365	7994.472	8001.132	7993.333	8110.848		931.8	934.6	42022.8	41876.28
	--									--								831.7	834.5	40541.33	41838.32	20725.63	19691.04	19680.94	19675.01	19674.76	19679.61	19674.41	19673.46	42925.51		701.7	704.5	8036.889	8040.509	8037.361	8135.269	8036.956	8038.568	8036.92	8038.012	8044.499	8036.889	8149.873		931.7	934.5	42011.33	41943.16
	--									--								831.6	834.4	41257.78	42882.84	20474.8	19557.67	19547.72	19541.85	19541.6	19546.35	19541.24	19540.31	43851.92		701.6	704.4	8056	8059.582	8056.468	8150.396	8056.067	8057.653	8056.031	8057.108	8063.428	8056	8164.734		931.6	934.4	42278.13	42019.7
	--									--								831.5	834.3	42041.78	43762.89	20235.75	19418.65	19408.84	19403.03	19402.79	19407.43	19402.42	19401.5	44631.3		701.5	704.3	7990.667	7994.211	7991.13	8081.325	7990.733	7992.294	7990.698	7991.76	7997.919	7990.667	8095.405		931.5	934.3	42246.93	42109.23
	--									--								831.4	834.2	42774.67	44450.96	20006.15	19274.25	19264.58	19258.84	19258.59	19263.15	19258.23	19257.32	45233.53		701.4	704.2	7914.667	7918.175	7915.126	8001.814	7914.733	7916.269	7914.698	7915.746	7921.751	7914.667	8015.645		931.4	934.2	42206.93	42212.37
	--									--								831.3	834.1	43780	44921.95	19781.98	19122.77	19113.23	19107.55	19107.31	19111.77	19106.94	19106.04	45631.21		701.3	704.1	8019.556	8023.027	8020.011	8103.446	8019.621	8021.134	8019.586	8020.621	8026.477	8019.556	8117.035		931.3	934.1	42381.2	42327.5
	--									--								831.2	834	44511.11	45159.61	19562.9	18965.85	18956.44	18950.83	18950.58	18954.95	18950.2	18949.32	45806.11		701.2	704	8101.333	8104.769	8101.785	8182.152	8101.398	8102.888	8101.364	8102.385	8108.098	8101.333	8195.504		931.2	934	42433.33	42455.32
	--									--								831.1	833.9	45315.11	45151.95	19346.73	18803	18793.73	18788.17	18787.92	18792.21	18787.55	18786.68	45744.53		701.1	703.9	8077.333	8080.734	8077.781	8155.247	8077.398	8078.865	8077.364	8078.371	8083.945	8077.333	8168.371		931.1	933.9	42507.73	42595.82
	--									--								831	833.8	45873.78	44895.9	19133.5	18635.71	18626.56	18621.07	18620.82	18625.02	18620.44	18619.58	45441.95		701	703.8	8104.444	8107.811	8104.888	8179.608	8104.509	8105.953	8104.474	8105.469	8110.909	8104.444	8192.51		931	933.8	42617.6	42745.7
	--									--								830.9	833.7	46050.67	44396.4	18924.93	18466.3	18457.28	18451.84	18451.59	18455.71	18451.21	18450.36	44902.73		700.9	703.7	8108.889	8112.221	8109.328	8181.448	8108.953	8110.375	8108.919	8109.9	8115.212	8108.889	8194.134		930.9	933.7	42781.6	42902.06
	--									--								830.8	833.6	46240	43663.05	18719.08	18294.69	18285.78	18280.4	18280.16	18284.2	18279.77	18278.93	44134.57		700.8	703.6	7997.333	8000.632	7997.769	8067.433	7997.397	7998.798	7997.363	7998.332	8003.52	7997.333	8079.91		930.8	933.6	42814.67	43062.92
	--									--								830.7	833.5	45885.33	42715.42	18518.48	18124.2	18115.42	18110.09	18109.85	18113.81	18109.46	18108.64	43156.28		700.7	703.5	8014.667	8017.932	8015.098	8082.452	8014.73	8016.11	8014.696	8015.652	8020.721	8014.667	8094.724		930.7	933.5	42907.6	43224.09
	--									--								830.6	833.4	44731.11	41580.47	18327.42	17959.79	17951.13	17945.86	17945.61	17949.5	17945.22	17944.41	41994.13		700.6	703.4	8090.222	8093.455	8090.65	8155.805	8090.285	8091.645	8090.251	8091.196	8096.148	8090.222	8167.879		930.6	933.4	42992.27	43381.44
	--									--								830.5	833.3	43568.44	40284.99	18145.44	17801.54	17792.99	17787.78	17787.53	17791.35	17787.13	17786.34	40674.39		700.5	703.3	7959.111	7962.312	7959.535	8022.596	7959.173	7960.514	7959.14	7960.072	7964.912	7959.111	8034.477		930.5	933.3	43258.93	43528.89
	--									--								830.4	833.2	41704.89	38863.52	17976.48	17653.82	17645.38	17640.22	17639.98	17643.72	17639.57	17638.79	39231.16		700.4	703.2	7956.889	7960.058	7957.309	8018.375	7956.951	7958.272	7956.918	7957.838	7962.569	7956.889	8030.068		930.4	933.2	43436.4	43661.43
	--									--								830.3	833.1	39664.44	37349.48	17821.35	17517.77	17509.45	17504.34	17504.1	17507.77	17503.69	17502.92	37697.53		700.3	703.1	8015.556	8018.694	8015.972	8075.136	8015.617	8016.919	8015.584	8016.493	8021.12	8015.556	8086.646		930.3	933.1	43670.93	43773.38
	--									--								830.2	833	37420	35777.22	17681.15	17394.74	17386.52	17381.46	17381.22	17384.82	17380.82	17380.05	36107.59		700.2	703	8076.444	8079.552	8076.858	8134.221	8076.505	8077.789	8076.473	8077.371	8081.896	8076.444	8145.552		930.2	933	43785.6	43862.07
	--									--								830.1	832.9	35308	34178.4	17554.85	17283.98	17275.87	17270.86	17270.62	17274.16	17270.21	17269.46	34492.75		700.1	702.9	8103.111	8106.189	8103.521	8159.169	8103.172	8104.437	8103.139	8104.026	8108.453	8103.111	8170.328		930.1	932.9	43880.67	43923.94
	--									--								830	832.8	32807.11	32586.15	17444.72	17187.96	17179.96	17175	17174.76	17178.23	17174.35	17173.61	32885.89		700	702.8	8062.667	8065.714	8063.073	8117.082	8062.727	8063.974	8062.695	8063.571	8067.902	8062.667	8128.07		930	932.8	44008.4	43955.79
	--									--								829.9	832.7	30754.67	31025.68	17347.96	17104.02	17096.12	17091.22	17090.98	17094.38	17090.56	17089.83	31312.11			--													929.9	932.7	43896.27	43957.64
	--									--								829.8	832.6	28770.67	29520.99	17263.92	17031.81	17024.01	17019.15	17018.91	17022.26	17018.5	17017.77	29795.13			--													929.8	932.6	43880.27	43927.81
	--									--								829.7	832.5	26959.56	28091.43	17191.49	16970.32	16962.62	16957.81	16957.58	16960.86	16957.16	16956.44	28354.17			--													929.7	932.5	43954.53	43865.38
	--									--								829.6	832.4	25245.33	26752.48	17130.06	16919.04	16911.43	16906.67	16906.44	16909.66	16906.02	16905.31	27004.62			--													929.6	932.4	43862.53	43770.95
	--									--								829.5	832.3	24040.44	25512.77	17076.45	16874.87	16867.36	16862.65	16862.41	16865.58	16861.99	16861.3	25755.01			--													929.5	932.3	43841.2	43649.48
	--									--								829.4	832.2	22804.89	24380.07	17030.83	16838.06	16830.64	16825.98	16825.74	16828.85	16825.32	16824.63	24613.07			--													929.4	932.2	43639.6	43505.96
	--									--								829.3	832.1	21741.33	23357.11	16992.12	16807.58	16800.26	16795.64	16795.4	16798.46	16794.98	16794.3	23581.44			--													929.3	932.1	43360	43345.18
	--									--								829.2	832	20884.89	22443.03	16959.04	16782.2	16774.97	16770.4	16770.16	16773.17	16769.74	16769.07	22659.23			--													929.2	932	43234.13	43170.4
	--									--								829.1	831.9	20216	21634.29	16930.4	16760.8	16753.66	16749.12	16748.89	16751.84	16748.46	16747.8	21842.84			--													929.1	931.9	43035.2	42986.98
	--									--								829	831.8	19844.89	20924.43	16904.38	16741.55	16734.5	16730.01	16729.78	16732.68	16729.35	16728.7	21125.8			--													929	931.8	42843.2	42799.56
	--									--								828.9	831.7	19284.89	20308.33	16882.13	16725.65	16718.68	16714.23	16714	16716.85	16713.57	16712.93	20502.95			--													928.9	931.7	42652.13	42612.8
	--									--								828.8	831.6	18788.44	19778.19	16863.21	16712.71	16705.83	16701.42	16701.19	16703.99	16700.76	16700.13	19966.43			--													928.8	931.6	42378.27	42431.85
	--									--								828.7	831.5	18557.78	19324.33	16845.97	16701.12	16694.32	16689.96	16689.73	16692.48	16689.29	16688.67	19506.52			--													928.7	931.5	42177.2	42259.39
	--									--								828.6	831.4	18382.67	18938.12	16830.05	16690.54	16683.82	16679.5	16679.27	16681.98	16678.84	16678.22	19114.59			--													928.6	931.4	41981.87	42098.03
	--									--								828.5	831.3	18105.78	18612.03	16816.06	16681.6	16674.96	16670.68	16670.46	16673.12	16670.02	16669.41	18783.07			--													928.5	931.3	41842.53	41949.23
	--									--								828.4	831.2	17724	18338.91	16804.64	16674.97	16668.41	16664.17	16663.94	16666.56	16663.51	16662.9	18504.79			--													928.4	931.2	41780.27	41813.64
	--									--								828.3	831.1	17780.44	18108.8	16793.08	16667.95	16661.47	16657.27	16657.04	16659.62	16656.61	16656.01	18269.77			--													928.3	931.1	41550.27	41693.3
	--									--								828.2	831	17682.22	17916.04	16782.32	16661.5	16655.09	16650.93	16650.71	16653.24	16650.27	16649.68	18072.34			--													928.2	931	41433.87	41587.79
	--									--								828.1	830.9	17470.22	17755.46	16773.04	16656.32	16649.98	16645.86	16645.64	16648.13	16645.2	16644.62	17907.31			--													928.1	930.9	41344.4	41497.07
	--									--								828	830.8	17280.89	17621.78	16765.11	16652.27	16646.01	16641.93	16641.71	16644.16	16641.27	16640.69	17769.39			--													928	930.8	41268.27	41419.24
	--									--								827.9	830.7	17248	17509.6	16757.56	16648.41	16642.22	16638.18	16637.95	16640.36	16637.52	16636.95	17653.18			--													927.9	930.7	41224.67	41353.04
	--									--								827.8	830.6	17294.67	17414.66	16749.87	16644.24	16638.12	16634.11	16633.89	16636.26	16633.45	16632.89	17554.38			--													927.8	930.6	41176.13	41297.4
	--									--								827.7	830.5	17069.78	17335.46	16743.71	16641.43	16635.38	16631.41	16631.19	16633.52	16630.75	16630.19	17471.5			--													927.7	930.5	41218.27	41250.38
	--									--								827.6	830.4	16891.56	17269.1	16738.79	16639.7	16633.73	16629.79	16629.57	16631.87	16629.13	16628.58	17401.61			--													927.6	930.4	41048.8	41212.56
	--									--								827.5	830.3	16874.67	17212.43	16734.1	16638.08	16632.17	16628.27	16628.05	16630.31	16627.61	16627.06	17341.55			--													927.5	930.3	41139.47	41180.63
	--									--								827.4	830.2	16748.89	17164.35	16730.32	16637.22	16631.37	16627.51	16627.29	16629.51	16626.85	16626.31	17290.23			--													927.4	930.2	41176.8	41154.42
	--									--								827.3	830.1	16749.33	17122.65	16726.66	16636.35	16630.57	16626.74	16626.52	16628.71	16626.08	16625.55	17245.42			--													927.3	930.1	40955.2	41133.72
	--									--								827.2	830	16801.33	17085.86	16722.79	16635.16	16629.45	16625.65	16625.43	16627.59	16624.99	16624.47	17205.64			--													927.2	930	40987.47	41116.98
	--									--								827.1	829.9	16796	17053.39	16719.07	16634	16628.35	16624.59	16624.37	16626.49	16623.94	16623.41	17170.31			--													927.1	929.9	41089.47	41182.22
	--									--								827	829.8	16715.11	17025.01	16715.95	16633.33	16627.74	16624.02	16623.8	16625.89	16623.37	16622.85	17139.18			--													927	929.8	41035.73	41117.4
	--									--								826.9	829.7	16544.89	16999.83	16713.03	16632.75	16627.23	16623.53	16623.32	16625.37	16622.88	16622.37	17111.36			--													926.9	929.7	41101.6	41174.15
	--									--								826.8	829.6	16607.11	16962.52	16695.43	16617.4	16611.93	16608.27	16608.05	16610.08	16607.62	16607.11	17071.51			--													926.8	929.6	41001.6	41066.59
	--									--								826.7	829.5	16528	16863.57	16614.06	16538.19	16532.78	16529.15	16528.93	16530.93	16528.5	16528	16970.11			--													926.7	929.5	41093.87	41152.59
	--									--								826.6	829.4	16458.67	16776.25	16542.55	16468.76	16463.41	16459.81	16459.59	16461.56	16459.16	16458.67	16880.43			--													926.6	929.4	41025.87	41079.36
	--									--								826.5	829.3	16349.78	16650.96	16431.57	16359.77	16354.48	16350.92	16350.7	16352.64	16350.27	16349.78	16752.86			--													926.5	929.3	41041.33	41090.35
	--									--								826.4	829.2	16352	16638.14	16431.78	16361.9	16356.67	16353.13	16352.92	16354.82	16352.48	16352	16737.85			--													926.4	929.2	40988.4	41033.56
	--									--								826.3	829.1	16417.33	16689.63	16495.18	16427.14	16421.96	16418.46	16418.24	16420.12	16417.81	16417.33	16787.22			--													926.3	929.1	40996.27	41038.07
	--									--								826.2	829	16386.22	16645.74	16462.2	16395.94	16390.82	16387.34	16387.13	16388.98	16386.69	16386.22	16741.28			--													926.2	929	40934	40972.87
	--									--								826.1	828.9	16428.44	16676.13	16502.62	16438.07	16433	16429.56	16429.34	16431.17	16428.91	16428.44	16769.69			--													926.1	928.9	41023.73	41060.02
	--									--								826	828.8	16373.78	16610.46	16446.22	16383.32	16378.3	16374.88	16374.67	16376.47	16374.24	16373.78	16702.12			--													926	928.8	41018.13	41052.13
	--									--								825.9	828.7	16475.56	16702	16546.33	16485.01	16480.04	16476.66	16476.45	16478.22	16476.01	16475.56	16791.82			--													925.9	928.7	41128.93	41160.89
	--									--								825.8	828.6	16441.78	16658.68	16510.94	16451.14	16446.23	16442.87	16442.66	16444.41	16442.23	16441.78	16746.71			--													925.8	928.6	41148	41178.12
	--									--								825.7	828.5	16260	16467.97	16327.6	16269.28	16264.42	16261.09	16260.88	16262.6	16260.45	16260	16554.28			--													925.7	928.5	41147.87	41176.32
	--									--								825.6	828.4	16218.22	16417.83	16284.32	16227.42	16222.61	16219.31	16219.1	16220.79	16218.67	16218.22	16502.47			--													925.6	928.4	41093.07	41119.99
	--									--								825.5	828.3	16213.33	16405.1	16277.97	16222.45	16217.68	16214.41	16214.2	16215.87	16213.77	16213.33	16488.12			--													925.5	928.3	41110.67	41136.19
	--									--								825.4	828.2	16178.67	16363.06	16241.9	16187.7	16182.98	16179.74	16179.53	16181.18	16179.1	16178.67	16444.51			--													925.4	928.2	41114.8	41139.03
	--									--								825.3	828.1	16204.89	16382.34	16266.76	16213.84	16209.17	16205.95	16205.75	16207.37	16205.32	16204.89	16462.28			--													925.3	928.1	41092.67	41115.71
	--									--								825.2	828	16107.56	16278.47	16168.1	16116.43	16111.81	16108.62	16108.41	16110.01	16107.98	16107.56	16356.93			--													925.2	928	40980.8	41002.75
	--									--								825.1	827.9	16121.78	16286.52	16181.05	16130.57	16126	16122.83	16122.63	16124.2	16122.2	16121.78	16363.55			--													925.1	927.9	41046	41066.94
	--									--								825	827.8	16139.56	16298.46	16197.59	16148.27	16143.74	16140.6	16140.4	16141.95	16139.97	16139.56	16374.11			--													925	927.8	41119.87	41139.86
	--									--								824.9	827.7	16160	16313.39	16216.84	16168.64	16164.16	16161.04	16160.84	16162.37	16160.41	16160	16387.69			--														--
	--									--								824.8	827.6	16106.67	16254.83	16162.35	16115.23	16110.79	16107.7	16107.5	16109.01	16107.08	16106.67	16327.83			--														--
	--									--								824.7	827.5	16024.89	16168.09	16079.45	16033.38	16028.98	16025.92	16025.72	16027.21	16025.29	16024.89	16239.82			--														--
	--									--								824.6	827.4	16060.44	16198.94	16113.92	16068.86	16064.51	16061.47	16061.27	16062.74	16060.85	16060.44	16269.44			--														--
	--									--								824.5	827.3	16058.67	16192.69	16111.08	16067.01	16062.7	16059.69	16059.49	16060.94	16059.06	16058.67	16261.99
	--									--								824.4	827.2	15973.33	16103.11	16024.72	15981.61	15977.34	15974.35	15974.15	15975.58	15973.73	15973.33	16171.24
	--									--								824.3	827.1	16029.33	16155.06	16079.73	16037.54	16033.31	16030.34	16030.14	16031.56	16029.72	16029.33	16222.06
	--									--								824.2	827	16085.33	16207.2	16134.76	16093.47	16089.28	16086.34	16086.14	16087.53	16085.72	16085.33	16273.1
	--									--								824.1	826.9	16131.11	16249.3	16179.6	16139.17	16135.03	16132.11	16131.91	16133.29	16131.49	16131.11	16314.12
	--									--								824	826.8	15891.11	16005.79	15938.69	15899.11	15895	15892.11	15891.91	15893.26	15891.49	15891.11	16069.57
	--									--								823.9	826.7	15955.11	16066.44	16001.8	15963.04	15958.97	15956.1	15955.9	15957.24	15955.48	15955.11	16129.2
	--									--								823.8	826.6	15952.44	16060.56	15998.27	15960.31	15956.28	15953.43	15953.23	15954.55	15952.81	15952.44	16122.34
	--									--								823.7	826.5	15955.11	16060.16	16000.1	15962.91	15958.92	15956.09	15955.89	15957.2	15955.48	15955.11	16120.97
	--									--								823.6	826.4	16010.67	16112.78	16054.84	16018.4	16014.45	16011.64	16011.45	16012.73	16011.03	16010.67	16172.65
	--									--								823.5	826.3	15967.56	16066.86	16010.94	15975.22	15971.31	15968.53	15968.33	15969.6	15967.91	15967.56	16125.81
	--									--								823.4	826.2	15923.56	16020.17	15966.17	15931.16	15927.28	15924.52	15924.33	15925.58	15923.91	15923.56	16078.22
	--									--								823.3	826.1	15881.33	15975.36	15923.19	15888.88	15885.03	15882.29	15882.1	15883.33	15881.69	15881.33	16032.54
	--									--								823.2	826	15884	15975.54	15925.13	15891.48	15887.67	15884.95	15884.76	15885.98	15884.35	15884	16031.88
	--									--								823.1	825.9	15800.44	15889.61	15840.86	15807.86	15804.09	15801.39	15801.2	15802.41	15800.79	15800.44	15945.11
	--									--								823	825.8	15866.67	15953.54	15906.39	15874.03	15870.29	15867.61	15867.42	15868.61	15867.01	15866.67	16008.23
	--									--								822.9	825.7	15894.22	15978.9	15933.27	15901.52	15897.82	15895.16	15894.97	15896.14	15894.56	15894.22	16032.8
	--									--								822.8	825.6	15850.22	15932.78	15888.62	15857.46	15853.8	15851.16	15850.97	15852.12	15850.56	15850.22	15985.91
	--									--								822.7	825.5	15860	15940.52	15897.75	15867.18	15863.55	15860.93	15860.74	15861.88	15860.33	15860	15992.89
	--									--								822.6	825.4	15879.56	15958.11	15916.68	15886.68	15883.08	15880.48	15880.29	15881.42	15879.89	15879.56	16009.75
	--									--								822.5	825.3	15903.56	15980.22	15940.07	15910.63	15907.06	15904.48	15904.29	15905.4	15903.88	15903.56	16031.14
	--									--								822.4	825.2	15800.89	15875.73	15836.81	15807.9	15804.37	15801.81	15801.62	15802.72	15801.21	15800.89	15925.95
	--									--								822.3	825.1	15745.78	15818.87	15781.12	15752.74	15749.23	15746.69	15746.5	15747.59	15746.1	15745.78	15868.39
	--									--								822.2	825	15957.33	16028.73	15992.11	15964.24	15960.76	15958.24	15958.05	15959.13	15957.65	15957.33	16077.58
	--									--								822.1	824.9	15943.11	16012.87	15977.33	15949.96	15946.52	15944.01	15943.83	15944.89	15943.43	15943.11	16061.06
	--									--								822	824.8	15744	15812.18	15777.68	15750.8	15747.38	15744.9	15744.71	15745.76	15744.31	15744	15859.73
	--									--								821.9	824.7	15707.11	15773.76	15740.27	15713.86	15710.47	15708.01	15707.82	15708.85	15707.42	15707.11	15820.68
	--									--								821.8	824.6	15650.22	15715.4	15682.86	15656.92	15653.56	15651.11	15650.93	15651.95	15650.53	15650.22	15761.7
	--									--								821.7	824.5	15592.44	15656.2	15624.58	15599.09	15595.76	15593.33	15593.15	15594.16	15592.75	15592.44	15701.9
	--									--								821.6	824.4	15921.78	15984.15	15953.43	15928.37	15925.07	15922.66	15922.48	15923.47	15922.08	15921.78	16029.26
	--									--								821.5	824.3	15916.89	15977.93	15948.06	15923.43	15920.16	15917.77	15917.58	15918.57	15917.19	15916.89	16022.46
	--									--								821.4	824.2	15838.67	15898.41	15869.37	15845.16	15841.92	15839.54	15839.36	15840.33	15838.96	15838.67	15942.38
	--									--								821.3	824.1	15714.22	15772.72	15744.46	15720.66	15717.45	15715.09	15714.91	15715.87	15714.52	15714.22	15816.13
	--									--								821.2	824	15800.44	15857.73	15830.24	15806.84	15803.65	15801.31	15801.13	15802.08	15800.74	15800.44	15900.6
	--									--								821.1	823.9	15901.78	15957.89	15931.13	15908.12	15904.96	15902.64	15902.46	15903.4	15902.07	15901.78	16000.23
	--									--								821	823.8	15924.89	15979.86	15953.81	15931.19	15928.05	15925.75	15925.57	15926.49	15925.18	15924.89	16021.68
	--									--								820.9	823.7	15741.78	15795.65	15770.29	15748.03	15744.92	15742.63	15742.45	15743.37	15742.06	15741.78	15836.95
	--									--								820.8	823.6	15708.89	15761.69	15736.99	15715.09	15712.01	15709.74	15709.56	15710.46	15709.17	15708.89	15802.49
	--									--								820.7	823.5	15828.89	15880.65	15856.59	15835.05	15831.99	15829.73	15829.56	15830.45	15829.17	15828.89	15920.97
	--									--								820.6	823.4	15763.56	15814.31	15790.86	15769.67	15766.64	15764.4	15764.22	15765.1	15763.83	15763.56	15854.14
	--									--								820.5	823.3	15654.67	15704.45	15681.59	15660.74	15657.73	15655.5	15655.33	15656.2	15654.94	15654.67	15743.8
	--									--								820.4	823.2	15655.56	15704.39	15682.1	15661.58	15658.6	15656.39	15656.21	15657.07	15655.83	15655.56	15743.28
	--									--								820.3	823.1	15821.33	15869.24	15847.51	15827.31	15824.36	15822.16	15821.99	15822.84	15821.6	15821.33	15907.68
	--									--								820.2	823	15802.67	15849.68	15828.48	15808.6	15805.71	15803.49	15803.32	15804.16	15802.94	15802.67	15887.71
	--									--								820.1	822.9	15764.89	15811.03	15790.35	15770.78	15767.92	15765.71	15765.53	15766.37	15765.16	15764.89	15848.62
	--									--								820	822.8	15723.11	15768.4	15748.23	15728.96	15726.12	15723.93	15723.75	15724.58	15723.38	15723.11	15805.57
	--									--								819.9	822.7	15860.44	15904.91	15885.22	15866.25	15863.43	15861.26	15861.08	15861.9	15860.71	15860.44	15941.66
	--									--								819.8	822.6	15753.33	15797	15777.78	15759.1	15756.3	15754.14	15753.97	15754.77	15753.59	15753.33	15833.33
	--									--								819.7	822.5	15753.78	15796.66	15777.9	15759.5	15756.73	15754.58	15754.41	15755.21	15754.04	15753.78	15832.59
	--									--								819.6	822.4	15712.89	15755.02	15736.69	15718.58	15715.82	15713.69	15713.52	15714.31	15713.15	15712.89	15790.54
	--									--								819.5	822.3	15697.78	15739.17	15721.27	15703.42	15700.69	15698.58	15698.4	15699.18	15698.03	15697.78	15774.3
	--									--								819.4	822.2	15732	15772.67	15755.18	15737.61	15734.89	15732.79	15732.62	15733.39	15732.25	15732	15807.41
	--									--								819.3	822.1	15766.67	15806.63	15789.55	15772.23	15769.54	15767.46	15767.29	15768.05	15766.92	15766.67	15841
	--									--								819.2	822	15760	15799.29	15782.59	15765.53	15762.85	15760.79	15760.62	15761.37	15760.25	15760	15833.27
	--									--								819.1	821.9	15723.56	15762.18	15745.85	15729.04	15726.39	15724.34	15724.17	15724.91	15723.8	15723.56	15795.8
	--									--								819	821.8	15586.22	15624.19	15608.24	15591.67	15589.04	15587	15586.83	15587.57	15586.47	15586.22	15657.46
	--									--								818.9	821.7	15583.11	15620.45	15604.85	15588.52	15585.91	15583.89	15583.72	15584.45	15583.35	15583.11	15653.36
	--									--								818.8	821.6	15683.11	15719.83	15704.57	15688.49	15685.89	15683.88	15683.72	15684.44	15683.35	15683.11	15752.39
	--									--								818.7	821.5	15650.67	15686.79	15671.86	15656.01	15653.42	15651.44	15651.27	15651.98	15650.9	15650.67	15719
	--									--								818.6	821.4	15608.89	15644.43	15629.82	15614.19	15611.63	15609.65	15609.49	15610.19	15609.13	15608.89	15676.3
	--									--								818.5	821.3	15635.56	15670.52	15656.23	15640.82	15638.27	15636.32	15636.15	15636.85	15635.79	15635.56	15702.06
	--									--								818.4	821.2	15646.22	15680.63	15666.64	15651.45	15648.92	15646.98	15646.82	15647.5	15646.46	15646.22	15711.85
	--									--								818.3	821.1	15624.89	15658.75	15645.06	15630.08	15627.57	15625.64	15625.48	15626.16	15625.12	15624.89	15689.65
	--									--								818.2	821	15745.78	15779.11	15765.71	15750.94	15748.44	15746.53	15746.37	15747.04	15746.01	15745.78	15809.69
	--									--								818.1	820.9	15530.67	15563.48	15550.36	15535.79	15533.31	15531.42	15531.25	15531.92	15530.89	15530.67	15593.75
	--									--								818	820.8	15576.89	15609.19	15596.34	15581.98	15579.52	15577.63	15577.47	15578.13	15577.12	15576.89	15639.16
	--									--								817.9	820.7	15654.67	15686.47	15673.89	15659.72	15657.28	15655.41	15655.25	15655.9	15654.89	15654.67	15716.15
	--									--								817.8	820.6	15580.89	15612.21	15599.89	15585.91	15583.49	15581.63	15581.47	15582.11	15581.11	15580.89	15641.59
	--									--								817.7	820.5	15632.89	15663.74	15651.66	15637.88	15635.48	15633.62	15633.46	15634.1	15633.11	15632.89	15692.83
	--									--								817.6	820.4	15524.44	15554.83	15543	15529.4	15527.02	15525.18	15525.02	15525.65	15524.66	15524.44	15583.64
	--									--								817.5	820.3	15533.78	15563.71	15552.12	15538.7	15536.34	15534.51	15534.35	15534.97	15534	15533.78	15592.25
	--									--								817.4	820.2	15593.33	15622.82	15611.46	15598.22	15595.88	15594.06	15593.9	15594.52	15593.55	15593.33	15651.09
	--									--								817.3	820.1	15544.89	15573.95	15562.81	15549.75	15547.43	15545.61	15545.45	15546.06	15545.1	15544.89	15601.94
	--									--								817.2	820	15519.11	15547.75	15536.83	15523.94	15521.64	15519.83	15519.67	15520.28	15519.32	15519.11	15575.47
	--									--								817.1	819.9	15465.78	15494	15483.3	15470.57	15468.29	15466.49	15466.34	15466.93	15465.99	15465.78	15521.46
	--									--								817	819.8	15563.56	15591.37	15580.88	15568.32	15566.05	15564.27	15564.11	15564.7	15563.77	15563.56	15618.58
	--									--								816.9	819.7	15609.78	15637.2	15626.9	15614.51	15612.26	15610.49	15610.33	15610.92	15609.99	15609.78	15664.15
	--									--								816.8	819.6	15529.33	15556.37	15546.27	15534.04	15531.8	15530.04	15529.88	15530.46	15529.54	15529.33	15583.07
	--									--								816.7	819.5	15541.33	15567.99	15558.08	15546.01	15543.79	15542.04	15541.88	15542.45	15541.54	15541.33	15594.44
	--									--								816.6	819.4	15433.33	15459.62	15449.9	15437.98	15435.78	15434.03	15433.88	15434.45	15433.54	15433.33	15485.83
	--									--								816.5	819.3	15633.78	15659.7	15650.16	15638.39	15636.21	15634.48	15634.32	15634.88	15633.98	15633.78	15685.67
	--									--								816.4	819.2	15502.22	15527.79	15518.43	15506.81	15504.64	15502.92	15502.76	15503.32	15502.42	15502.22	15553.52
	--									--								816.3	819.1	15735.11	15760.33	15751.14	15739.66	15737.52	15735.8	15735.65	15736.2	15735.31	15735.11	15785.83
	--									--								816.2	819	15577.33	15602.21	15593.19	15581.86	15579.72	15578.02	15577.87	15578.41	15577.53	15577.33	15627.48
	--									--								816.1	818.9	15517.78	15542.32	15533.46	15522.34	15520.16	15518.46	15518.31	15518.85	15517.97	15517.78	15567.42
	--									--								816	818.8	15468	15492.21	15483.52	15472.53	15470.36	15468.68	15468.53	15469.06	15468.2	15468	15517.09
	--									--								815.9	818.7	15554.22	15578.11	15569.58	15558.72	15556.57	15554.9	15554.75	15555.28	15554.42	15554.22	15602.77
	--									--								815.8	818.6	15515.56	15539.13	15530.75	15520.03	15517.89	15516.23	15516.08	15516.6	15515.75	15515.56	15563.57
	--									--								815.7	818.5	15603.11	15626.38	15618.14	15607.55	15605.44	15603.79	15603.63	15604.15	15603.3	15603.11	15650.6
	--									--								815.6	818.4	15585.78	15608.74	15600.65	15590.19	15588.09	15586.45	15586.3	15586.81	15585.97	15585.78	15632.76
	--									--								815.5	818.3	15609.78	15632.44	15624.5	15614.16	15612.08	15610.45	15610.3	15610.8	15609.97	15609.78	15656.25
	--									--								815.4	818.2	15476	15498.37	15490.57	15480.36	15478.28	15476.67	15476.52	15477.02	15476.19	15476	15521.97
	--									--								815.3	818.1	15590.22	15612.31	15604.64	15594.55	15592.49	15590.88	15590.74	15591.23	15590.41	15590.22	15635.7
	--									--								815.2	818	15548.44	15570.25	15562.72	15552.74	15550.7	15549.1	15548.95	15549.45	15548.63	15548.44	15593.44
	--									--								815.1	817.9	15557.78	15579.31	15571.91	15562.05	15560.02	15558.43	15558.29	15558.77	15557.96	15557.78	15602.3
	--									--								815	817.8	15567.56	15588.82	15581.54	15571.8	15569.79	15568.21	15568.07	15568.54	15567.74	15567.56	15611.62
[truncated: 14 more columns]
