# Supplementary material for: The methanol electrooxidation activity and the CO-resilient surface of a La x Fe 1− y − z Cu y Pd z O 3 perovskite
Source: Royal Society of Chemistry journal article supplement (doi:10.1039/d5ta04846j), 2026-01-01
Supplement: d5ta04846j5.xlsx [file d5ta04846j5.xlsx]

## Sheet: Feuil1
	bare electrode			LaFePdO + supporting electrolyte OH-			LaFePdO + supporting electrolyte OH- + 1 M MeOH
	E	j		E	j		E	j
	V	µA/cm^2		V	µA/cm^2		V	µA/cm^2
	-0.09996	-2.19352		-0.09996	-1.01239		-0.09996	-1.19165
	-0.05004	-1.28777		-0.08996	-0.68223		-0.08996	-1.79515
	-3.91006E-5	-0.59303		-0.07996	-0.53157		-0.07996	-3.16874
	0.04996	-0.16151		-0.06996	-0.41103		-0.06996	-3.01306
	0.09988	0.10664		-0.06004	-0.25347		-0.06004	-2.07306
	0.14988	0.2522		-0.05004	-0.0594		-0.05004	-1.79867
	0.19988	0.31173		-0.04004	0.17856		-0.04004	-1.68468
	0.24981	0.32111		-0.03004	0.26555		-0.03004	-1.52026
	0.29981	0.32188		-0.02004	0.26214		-0.02004	-1.3943
	0.34981	0.31928		-0.01004	0.31371		-0.01004	-1.26059
	0.39973	0.3277		-3.91006E-5	0.42278		-3.91006E-5	-1.09215
	0.44973	0.355		0.00996	0.60664		0.00996	-1.01115
	0.49973	0.38771		0.01996	0.84386		0.01996	-0.94591
	0.54965	0.43694		0.02996	0.93227		0.02996	-0.86728
	0.59965	0.48905		0.03996	0.93286		0.03996	-0.82089
	0.64957	0.55871		0.04996	0.9865		0.04996	-0.77953
	0.69957	0.65451		0.05996	1.09687		0.05996	-0.71876
	0.74957	0.78289		0.06996	1.2815		0.06996	-0.69156
	0.7995	0.94864		0.07988	1.51888		0.07988	-0.65041
	0.8495	1.15696		0.08988	1.546		0.08988	-0.58761
	0.8995	1.44045		0.09988	1.63448		0.09988	-0.52688
	0.94942	2.15297		0.10988	1.7713		0.10988	-0.44539
	0.99942	2.80234		0.11988	1.89469		0.11988	-0.3499
	1.04942	3.12		0.12988	2.16282		0.12988	-0.24716
	1.09934	2.90525		0.13988	2.36054		0.13988	-0.14901
	1.04942	2.03098		0.14988	2.54348		0.14988	-0.05112
	0.99942	1.3687		0.15988	2.83795		0.15988	0.04029
	0.94942	0.83768		0.16988	3.03924		0.16988	0.12446
	0.8995	0.46016		0.17988	3.22553		0.17988	0.21893
	0.8495	0.23482		0.18988	3.51757		0.18988	0.31058
	0.7995	0.07105		0.19988	3.65531		0.19988	0.39161
	0.74957	-0.04562		0.20988	3.92849		0.20988	0.48793
	0.69957	-0.11816		0.21981	4.3027		0.21981	0.58334
	0.64957	-0.17523		0.22981	4.57587		0.22981	0.67647
	0.59965	-0.22572		0.2398	4.81798		0.2398	0.77234
	0.54965	-0.26198		0.24981	4.95943		0.24981	0.86282
	0.49973	-0.31296		0.25981	5.06851		0.25981	0.94298
	0.44973	-0.35136		0.26981	5.30641		0.26981	1.02795
	0.39973	-0.38029		0.27981	5.59197		0.27981	1.10917
	0.34981	-0.41378		0.2898	5.89132		0.2898	1.17967
	0.29981	-0.44727		0.29981	6.239		0.29981	1.25969
	0.24981	-0.51073		0.30981	6.50381		0.30981	1.33373
	0.19988	-0.59197		0.31981	6.88248		0.31981	1.40458
	0.14988	-0.69108		0.32981	7.32219		0.32981	1.4777
	0.09988	-0.81876		0.33981	7.85611		0.33981	1.54306
	0.04996	-1.00532		0.34981	8.36374		0.34981	1.6048
	-3.91006E-5	-1.25281		0.35973	8.83066		0.35973	1.6655
	-0.05004	-1.51858		0.36973	9.26917		0.36973	1.72505
				0.37973	9.85639		0.37973	1.78202
				0.38973	10.4735		0.38973	1.84249
				0.39973	11.12469		0.39973	1.90144
				0.40973	11.80048		0.40973	1.95708
				0.41973	12.47608		0.41973	2.01393
				0.42973	13.15513		0.42973	2.06975
				0.43973	13.77199		0.43973	2.12462
				0.44973	14.47488		0.44973	2.1823
				0.45973	15.19929		0.45973	2.23971
				0.46973	16.02406		0.46973	2.29547
				0.47973	17.07657		0.47973	2.35437
				0.48973	18.07587		0.48973	2.41189
				0.49973	19.20453		0.49973	2.46932
				0.50965	20.25421		0.50965	2.52906
				0.51965	21.37084		0.51965	2.58859
				0.52965	22.68648		0.52965	2.65008
				0.53965	24.12824		0.53965	2.71543
				0.54965	25.77282		0.54965	2.78423
				0.55965	27.41614		0.55965	2.85911
				0.56965	29.35768		0.56965	2.94149
				0.57965	31.38103		0.57965	3.03255
				0.58965	33.47884		0.58965	3.13454
				0.59965	35.79561		0.59965	3.24915
				0.60965	38.25322		0.60965	3.378
				0.61965	40.98528		0.61965	3.5205
				0.62965	44.12725		0.62965	3.67638
				0.63965	47.46426		0.63965	3.84306
				0.64957	51.14211		0.64957	4.01731
				0.65957	55.32682		0.65957	4.19591
				0.66957	59.8988		0.66957	4.37549
				0.67957	65.24586		0.67957	4.55381
				0.68957	71.20142		0.68957	4.72758
				0.69957	77.74947		0.69957	4.89524
				0.70957	85.16985		0.70957	5.05581
				0.71957	93.60849		0.71957	5.2089
				0.72957	103.1816		0.72957	5.35455
				0.73957	114.1959		0.73957	5.4928
				0.74957	126.52159		0.74957	5.62384
				0.75957	140.52456		0.75957	5.74804
				0.76957	156.1104		0.76957	5.86591
				0.77957	173.09696		0.77957	5.97696
				0.78949	191.7523		0.78949	6.08161
				0.7995	211.90517		0.7995	6.18004
				0.80949	233.9264		0.80949	6.27251
				0.81949	257.46921		0.81949	6.3593
				0.82949	282.61571		0.82949	6.44047
				0.8395	309.3673		0.8395	6.51648
				0.8495	337.36589		0.8495	6.5878
				0.8595	366.75584		0.8595	6.65522
				0.8695	397.06865		0.8695	6.71885
				0.8795	428.33121		0.8795	6.77921
				0.8895	460.45435		0.8895	6.83692
				0.8995	493.10262		0.8995	6.89261
				0.9095	526.65534		0.9095	6.94752
				0.9195	560.65393		0.9195	7.00184
				0.92942	595.20594		0.92942	7.05634
				0.93942	630.22788		0.93942	7.11179
				0.94942	665.30502		0.94942	7.16902
				0.95942	700.79406		0.95942	7.2287
				0.96942	736.39774		0.96942	7.29114
				0.97942	772.34961		0.97942	7.3566
				0.98942	808.96108		0.98942	7.4252
				0.99942	846.33829		0.99942	7.49746
				1.00942	884.48832		1.00942	7.57255
				1.01942	923.40269		1.01942	7.65068
				1.02942	963.24133		1.02942	7.73202
				1.03942	1004.29582		1.03942	7.81693
				1.04942	1046.50106		1.04942	7.90636
				1.05942	1090.06369		1.05942	8.00175
				1.06942	1152.45294		1.06942	8.13627
				1.07934	1207.5046		1.07934	8.26452
				1.08934	1233.46497		1.08934	8.35644
				1.09934	1212.29582		1.09934	8.38931
				1.08934	1132.56192		1.08934	8.34017
				1.07934	1041.07997		1.07934	8.25462
				1.06942	945.41826		1.06942	8.13666
				1.05942	854.23638		1.05942	7.99686
				1.04942	773.58953		1.04942	7.84816
				1.03942	701.67587		1.03942	7.69317
				1.02942	638.1925		1.02942	7.53746
				1.01942	582.04671		1.01942	7.3835
				1.00942	531.71691		1.00942	7.23236
				0.99942	486.49823		0.99942	7.08565
				0.98942	445.66454		0.98942	6.94352
				0.97942	408.49965		0.97942	6.80634
				0.96942	374.569		0.96942	6.67414
				0.95942	343.4862		0.95942	6.54701
				0.94942	315.08705		0.94942	6.42498
				0.93942	289.23425		0.93942	6.30783
				0.92942	265.46355		0.92942	6.19495
				0.9195	243.74947		0.9195	6.08633
				0.9095	223.85704		0.9095	5.98151
				0.8995	205.75655		0.8995	5.88003
				0.8895	189.13942		0.8895	5.78133
				0.8795	173.65464		0.8795	5.68459
				0.8695	159.38146		0.8695	5.58958
				0.8595	146.20241		0.8595	5.4958
				0.8495	134.17282		0.8495	5.40278
				0.8395	123.10134		0.8395	5.30989
				0.82949	112.99151		0.82949	5.21652
				0.81949	103.63284		0.81949	5.12233
				0.80949	94.96008		0.80949	5.02686
				0.7995	87.00142		0.7995	4.92987
				0.78949	79.47941		0.78949	4.83028
				0.77957	72.63539		0.77957	4.72827
				0.76957	66.33178		0.76957	4.62343
				0.75957	60.44091		0.75957	4.51542
				0.74957	55.11012		0.74957	4.40426
				0.73957	50.17608		0.73957	4.28893
				0.72957	45.54268		0.72957	4.16949
				0.71957	41.36999		0.71957	4.04568
				0.70957	37.60071		0.70957	3.91693
				0.69957	34.31578		0.69957	3.78299
				0.68957	31.32399		0.68957	3.64334
				0.67957	28.50573		0.67957	3.49831
				0.66957	25.82293		0.66957	3.34804
				0.65957	23.37339		0.65957	3.19256
				0.64957	21.27162		0.64957	3.03266
				0.63965	19.44062		0.63965	2.86753
				0.62965	17.90587		0.62965	2.69947
				0.61965	16.48592		0.61965	2.52739
				0.60965	15.06638		0.60965	2.3536
				0.59965	13.76183		0.59965	2.17923
				0.58965	12.47594		0.58965	2.00248
				0.57965	11.28814		0.57965	1.83019
				0.56965	10.26194		0.56965	1.65612
				0.55965	9.26613		0.55965	1.4853
				0.54965	8.48134		0.54965	1.31079
				0.53965	7.75189		0.53965	1.12798
				0.52965	6.9968		0.52965	0.94112
				0.51965	6.35735		0.51965	0.72863
				0.50965	5.79781		0.50965	0.49792
				0.49973	5.31372		0.49973	0.21856
				0.48973	4.8847		0.48973	-0.15295
				0.47973	4.30326		0.47973	-0.74266
				0.46973	3.69277		0.46973	-2.45702
				0.45973	3.04624		0.45973	-1.18436
				0.44973	2.37214		0.44973	-0.35949
				0.43973	1.69761		0.43973	0.07172
				0.42973	0.95742		0.42973	0.36647
				0.41973	0.24432		0.41973	0.57397
				0.40973	-0.29575		0.40973	0.73085
				0.39973	-0.73922		0.39973	0.84352
				0.38973	-1.02395		0.38973	0.91925
				0.37973	-1.29106		0.37973	0.96775
				0.36973	-1.49038		0.36973	0.99002
				0.35973	-1.59992		0.35973	1.00535
				0.34981	-1.76343		0.34981	1.00273
				0.33981	-1.96572		0.33981	0.98781
				0.32981	-2.20151		0.32981	0.96733
				0.31981	-2.29074		0.31981	0.93514
				0.30981	-2.3488		0.30981	0.90613
				0.29981	-2.43469		0.29981	0.87359
				0.2898	-2.40764		0.2898	0.84427
				0.27981	-2.23592		0.27981	0.8166
				0.26981	-2.13563		0.26981	0.79552
				0.25981	-1.91305		0.25981	0.77794
				0.24981	-1.92086		0.24981	0.7579
				0.2398	-2.0232		0.2398	0.7469
				0.22981	-2.02947		0.22981	0.7286
				0.21981	-2.2413		0.21981	0.72223
				0.20988	-2.29737		0.20988	0.71167
				0.19988	-2.33731		0.19988	0.70366
				0.18988	-2.36839		0.18988	0.70766
				0.17988	-2.36654		0.17988	0.70343
				0.16988	-2.36868		0.16988	0.7141
				0.15988	-2.36712		0.15988	0.7194
				0.14988	-2.36418		0.14988	0.73141
				0.13988	-2.36352		0.13988	0.74679
				0.12988	-2.30123		0.12988	0.76104
				0.11988	-2.32742		0.11988	0.77468
				0.10988	-2.43721		0.10988	0.79097
				0.09988	-2.62134		0.09988	0.81165
				0.08988	-2.86256		0.08988	0.83426
				0.07988	-2.95432		0.07988	0.85957
				0.06996	-3.01766		0.06996	0.8746
				0.05996	-3.04585		0.05996	0.89522
				0.04996	-3.04677		0.04996	0.90802
				0.03996	-2.98587		0.03996	0.92949
				0.02996	-3.00865		0.02996	0.94964
				0.01996	-3.11515		0.01996	0.96805
				0.00996	-3.29788		0.00996	0.9944
				-3.91006E-5	-3.53788		-3.91006E-5	1.00824
				-0.01004	-3.62921		-0.01004	1.02993
				-0.02004	-3.69248		-0.02004	1.04694
				-0.03004	-3.72062		-0.03004	1.06675
				-0.04004	-3.7216		-0.04004	1.09149
				-0.05004	-3.72211		-0.05004	1.10933
				-0.06004	-3.71834		-0.06004	1.13142
				-0.06996	-3.71506		-0.06996	1.14718
				-0.07996	-3.71398		-0.07996	1.16727
				-0.08996	-3.7121		-0.08996	1.18583
