# Supplementary material for: The methanol electrooxidation activity and the CO-resilient surface of a La x Fe 1− y − z Cu y Pd z O 3 perovskite
Source: Royal Society of Chemistry journal article supplement (doi:10.1039/d5ta04846j), 2026-01-01
Supplement: d5ta04846j6.xlsx [file d5ta04846j6.xlsx]

## Sheet: Feuil1
			E	j	E	j	E	j	E	j	E	j	E	j
			V	µA/cm^2	V	µA/cm^2	V	µA/cm^2	V	µA/cm^2	V	µA/cm^2	V	µA/cm^2
		c MeOH	0.1 M	0.1 M	0.2 M	0.2 M	0.5 M	0.5 M	1.0 M	1.0 M	1.5 M	1.5 M	2.0 M	2.0 M
			-0.09996	-0.4387	-0.09996	-1.72106	-0.09996	-0.03375	-0.09996	-0.30372	-0.09996	-1.72106	-0.09996	-1.04614
			-0.08996	-0.26661	-0.08996	-1.27608	-0.08996	0.03988	-0.08996	-0.1661	-0.08996	-1.31056	-0.08996	-0.76185
			-0.07996	-0.13104	-0.07996	-0.8975	-0.07996	0.11048	-0.07996	-0.04206	-0.07996	-0.95577	-0.07996	-0.51307
			-0.06996	-0.03633	-0.06996	-0.6235	-0.06996	0.16518	-0.06996	0.04914	-0.06996	-0.67384	-0.06996	-0.33053
			-0.06004	0.08441	-0.06004	-0.3752	-0.06004	0.20285	-0.06004	0.1258	-0.06004	-0.45646	-0.06004	-0.19078
			-0.05004	0.21849	-0.05004	-0.15138	-0.05004	0.23396	-0.05004	0.16552	-0.05004	-0.29847	-0.05004	-0.06852
			-0.04004	0.33639	-0.04004	0.0054	-0.04004	0.27166	-0.04004	0.1855	-0.04004	-0.18041	-0.04004	0.01622
			-0.03004	0.41627	-0.03004	0.13777	-0.03004	0.31606	-0.03004	0.21866	-0.03004	-0.10236	-0.03004	0.0915
			-0.02004	0.46631	-0.02004	0.25133	-0.02004	0.34236	-0.02004	0.24801	-0.02004	-0.02791	-0.02004	0.15609
			-0.01004	0.50749	-0.01004	0.36943	-0.01004	0.35342	-0.01004	0.28349	-0.01004	0.04922	-0.01004	0.20334
			-3.91006E-5	0.58075	-3.91006E-5	0.47046	-3.91006E-5	0.37519	-3.91006E-5	0.33549	-3.91006E-5	0.13196	-3.91006E-5	0.24494
			0.00996	0.70549	0.00996	0.54189	0.00996	0.40688	0.00996	0.3638	0.00996	0.22748	0.00996	0.28513
			0.01996	0.87002	0.01996	0.62594	0.01996	0.44312	0.01996	0.38832	0.01996	0.29996	0.01996	0.33097
			0.02996	1.03659	0.02996	0.72111	0.02996	0.47245	0.02996	0.42009	0.02996	0.36814	0.02996	0.36832
			0.03996	1.18426	0.03996	0.84532	0.03996	0.49472	0.03996	0.44004	0.03996	0.42322	0.03996	0.40039
			0.04996	1.31098	0.04996	0.93635	0.04996	0.53545	0.04996	0.45862	0.04996	0.45296	0.04996	0.43903
			0.05996	1.44862	0.05996	1.02114	0.05996	0.58549	0.05996	0.48736	0.05996	0.48194	0.05996	0.45829
			0.06996	1.60381	0.06996	1.12445	0.06996	0.62145	0.06996	0.50079	0.06996	0.50023	0.06996	0.4705
			0.07988	1.80017	0.07988	1.2486	0.07988	0.66738	0.07988	0.52183	0.07988	0.53746	0.07988	0.49853
			0.08988	2.02335	0.08988	1.37432	0.08988	0.73553	0.08988	0.55566	0.08988	0.58657	0.08988	0.51853
			0.09988	2.26569	0.09988	1.46324	0.09988	0.83602	0.09988	0.59044	0.09988	0.63378	0.09988	0.55964
			0.10988	2.49601	0.10988	1.54343	0.10988	0.95497	0.10988	0.64057	0.10988	0.68029	0.10988	0.59426
			0.11988	2.71764	0.11988	1.63516	0.11988	1.06048	0.11988	0.70476	0.11988	0.72386	0.11988	0.63893
			0.12988	2.93507	0.12988	1.77074	0.12988	1.18605	0.12988	0.78102	0.12988	0.78266	0.12988	0.68248
			0.13988	3.14381	0.13988	1.90644	0.13988	1.35868	0.13988	0.86156	0.13988	0.84465	0.13988	0.72369
			0.14988	3.37141	0.14988	2.03063	0.14988	1.54232	0.14988	0.95016	0.14988	0.90984	0.14988	0.7826
			0.15988	3.62994	0.15988	2.16075	0.15988	1.74127	0.15988	1.04111	0.15988	0.97752	0.15988	0.83813
			0.16988	3.94344	0.16988	2.30678	0.16988	1.94786	0.16988	1.13254	0.16988	1.04513	0.16988	0.90606
			0.17988	4.30004	0.17988	2.48722	0.17988	2.18528	0.17988	1.24474	0.17988	1.11304	0.17988	0.9849
			0.18988	4.65424	0.18988	2.65612	0.18988	2.47672	0.18988	1.36422	0.18988	1.17473	0.18988	1.06481
			0.19988	5.00866	0.19988	2.82098	0.19988	2.783	0.19988	1.47936	0.19988	1.23888	0.19988	1.15343
			0.20988	5.36151	0.20988	2.99526	0.20988	3.11856	0.20988	1.62895	0.20988	1.31398	0.20988	1.23796
			0.21981	5.71844	0.21981	3.19469	0.21981	3.49723	0.21981	1.79202	0.21981	1.40742	0.21981	1.33785
			0.22981	6.07689	0.22981	3.41935	0.22981	3.9097	0.22981	1.96692	0.22981	1.5311	0.22981	1.45217
			0.2398	6.44296	0.2398	3.63114	0.2398	4.33543	0.2398	2.16483	0.2398	1.65515	0.2398	1.58164
			0.24981	6.85151	0.24981	3.85945	0.24981	4.77373	0.24981	2.36984	0.24981	1.77718	0.24981	1.71958
			0.25981	7.30253	0.25981	4.11294	0.25981	5.2428	0.25981	2.56763	0.25981	1.88848	0.25981	1.87612
			0.26981	7.79933	0.26981	4.40825	0.26981	5.76361	0.26981	2.79533	0.26981	1.99683	0.26981	2.04069
			0.27981	8.31999	0.27981	4.73001	0.27981	6.31209	0.27981	3.03183	0.27981	2.13114	0.27981	2.20065
			0.2898	8.86403	0.2898	5.01652	0.2898	6.87502	0.2898	3.25331	0.2898	2.28634	0.2898	2.37408
			0.29981	9.43227	0.29981	5.31938	0.29981	7.44781	0.29981	3.52432	0.29981	2.46885	0.29981	2.54725
			0.30981	10.02464	0.30981	5.63076	0.30981	8.04861	0.30981	3.79516	0.30981	2.66924	0.30981	2.7327
			0.31981	10.61986	0.31981	5.98442	0.31981	8.65832	0.31981	4.0738	0.31981	2.86096	0.31981	2.9263
			0.32981	11.2171	0.32981	6.37932	0.32981	9.24753	0.32981	4.38286	0.32981	3.05022	0.32981	3.14018
			0.33981	11.83004	0.33981	6.74708	0.33981	9.85151	0.33981	4.67887	0.33981	3.24306	0.33981	3.37264
			0.34981	12.46602	0.34981	7.1374	0.34981	10.47507	0.34981	4.97687	0.34981	3.44846	0.34981	3.6058
			0.35973	13.14085	0.35973	7.54546	0.35973	11.14253	0.35973	5.28829	0.35973	3.69255	0.35973	3.83516
			0.36973	13.85602	0.36973	8.00811	0.36973	11.8155	0.36973	5.6128	0.36973	3.94824	0.36973	4.07472
			0.37973	14.61231	0.37973	8.51168	0.37973	12.48797	0.37973	5.94187	0.37973	4.20746	0.37973	4.3357
			0.38973	15.4276	0.38973	8.98863	0.38973	13.1849	0.38973	6.31226	0.38973	4.47476	0.38973	4.62416
			0.39973	16.31097	0.39973	9.49924	0.39973	13.9215	0.39973	6.69556	0.39973	4.74086	0.39973	4.92333
			0.40973	17.25747	0.40973	10.04551	0.40973	14.68294	0.40973	7.0786	0.40973	5.0373	0.40973	5.23993
			0.41973	18.26709	0.41973	10.6434	0.41973	15.45931	0.41973	7.49274	0.41973	5.37059	0.41973	5.59517
			0.42973	19.3172	0.42973	11.28634	0.42973	16.25591	0.42973	7.9228	0.42973	5.74106	0.42973	5.96549
			0.43973	20.40297	0.43973	11.91783	0.43973	17.09781	0.43973	8.36971	0.43973	6.1585	0.43973	6.35414
			0.44973	21.53999	0.44973	12.57226	0.44973	17.99915	0.44973	8.86664	0.44973	6.5912	0.44973	6.77315
			0.45973	22.72654	0.45973	13.28396	0.45973	18.92229	0.45973	9.39057	0.45973	7.03926	0.45973	7.22518
			0.46973	23.99533	0.46973	14.05077	0.46973	19.89384	0.46973	9.92912	0.46973	7.48887	0.46973	7.72222
			0.47973	25.33928	0.47973	14.8811	0.47973	20.91691	0.47973	10.53148	0.47973	7.96907	0.47973	8.23261
			0.48973	26.76306	0.48973	15.73616	0.48973	22.01614	0.48973	11.15505	0.48973	8.4983	0.48973	8.79241
			0.49973	28.29158	0.49973	16.61755	0.49973	23.16292	0.49973	11.81439	0.49973	9.10478	0.49973	9.42068
			0.50965	29.93404	0.50965	17.55626	0.50965	24.34989	0.50965	12.54168	0.50965	9.78637	0.50965	10.12435
			0.51965	31.71338	0.51965	18.55683	0.51965	25.59604	0.51965	13.31094	0.51965	10.54694	0.51965	10.9212
			0.52965	33.64897	0.52965	19.64487	0.52965	26.93064	0.52965	14.15513	0.52965	11.41456	0.52965	11.80367
			0.53965	35.74381	0.53965	20.80863	0.53965	28.3741	0.53965	15.11111	0.53965	12.41565	0.53965	12.84352
			0.54965	37.98443	0.54965	22.00396	0.54965	29.90488	0.54965	16.1874	0.54965	13.60481	0.54965	14.07248
			0.55965	40.37551	0.55965	23.26568	0.55965	31.57452	0.55965	17.446	0.55965	15.06143	0.55965	15.52767
			0.56965	42.90559	0.56965	24.63482	0.56965	33.41982	0.56965	18.94409	0.56965	16.88818	0.56965	17.29342
			0.57965	45.60637	0.57965	26.14919	0.57965	35.48634	0.57965	20.75018	0.57965	19.17749	0.57965	19.4426
			0.58965	48.49979	0.58965	27.8528	0.58965	37.82052	0.58965	22.97806	0.58965	22.03411	0.58965	22.12116
			0.59965	51.59929	0.59965	29.71762	0.59965	40.46553	0.59965	25.76844	0.59965	25.61047	0.59965	25.43185
			0.60965	54.92569	0.60965	31.7966	0.60965	43.58174	0.60965	29.31196	0.60965	30.09144	0.60965	29.492
			0.61965	58.51069	0.61965	34.18372	0.61965	47.36008	0.61965	33.80127	0.61965	35.68408	0.61965	34.48195
			0.62965	62.41628	0.62965	37.01812	0.62965	52.04897	0.62965	39.50304	0.62965	42.6334	0.62965	40.57226
			0.63965	66.61189	0.63965	40.41939	0.63965	57.88252	0.63965	46.66808	0.63965	51.10885	0.63965	47.91904
			0.64957	71.12031	0.64957	44.51734	0.64957	65.14055	0.64957	55.55173	0.64957	61.3189	0.64957	56.66143
			0.65957	75.96575	0.65957	49.51635	0.65957	74.16008	0.65957	66.41401	0.65957	73.41953	0.65957	66.96093
			0.66957	81.17481	0.66957	55.64699	0.66957	85.21401	0.66957	79.47841	0.66957	87.53673	0.66957	78.95725
			0.67957	86.86525	0.67957	63.21868	0.67957	98.59816	0.67957	94.99363	0.67957	103.83425	0.67957	92.83765
			0.68957	93.02024	0.68957	72.41656	0.68957	114.3857	0.68957	113.02194	0.68957	122.25789	0.68957	108.57594
			0.69957	99.67587	0.69957	83.40538	0.69957	132.68988	0.69957	133.65195	0.69957	142.80113	0.69957	126.18117
			0.70957	106.90488	0.70957	96.36277	0.70957	153.64331	0.70957	156.93135	0.70957	165.43383	0.70957	145.69851
			0.71957	114.74551	0.71957	111.46157	0.71957	177.32059	0.71957	182.89314	0.71957	190.10616	0.71957	167.13659
			0.72957	123.29625	0.72957	128.89342	0.72957	203.78627	0.72957	211.56971	0.72957	216.76716	0.72957	190.5322
			0.73957	132.61019	0.73957	148.78556	0.73957	233.04034	0.73957	242.93701	0.73957	245.29795	0.73957	215.82873
			0.74957	142.73319	0.74957	171.17764	0.74957	265.01911	0.74957	276.95117	0.74957	275.58103	0.74957	242.97948
			0.75957	153.71408	0.75957	196.04246	0.75957	299.72116	0.75957	313.57537	0.75957	307.57537	0.75957	272.00283
			0.76957	165.65888	0.76957	223.25973	0.76957	337.07997	0.76957	352.80396	0.76957	341.30078	0.76957	302.97381
			0.77957	178.51946	0.77957	252.40198	0.77957	376.61288	0.77957	394.24062	0.77957	376.48691	0.77957	335.66737
			0.78949	192.36518	0.78949	283.04742	0.78949	418.08068	0.78949	437.73531	0.78949	413.09271	0.78949	370.03397
			0.7995	207.21868	0.7995	314.65817	0.7995	461.12951	0.7995	483.0092	0.7995	451.00212	0.7995	406.00708
			0.80949	223.1649	0.80949	346.73461	0.80949	505.55697	0.80949	529.80609	0.80949	490.17834	0.80949	443.56122
			0.81949	240.21656	0.81949	378.80396	0.81949	551.06865	0.81949	577.84006	0.81949	530.61005	0.81949	482.64685
			0.82949	258.40198	0.82949	410.48691	0.82949	597.27389	0.82949	626.70064	0.82949	572.19108	0.82949	523.11536
			0.8395	277.76645	0.8395	441.68577	0.8395	643.97169	0.8395	676.19391	0.8395	615.07431	0.8395	564.9724
			0.8495	298.40057	0.8495	472.41472	0.8495	691.18188	0.8495	726.18117	0.8495	659.4678	0.8495	608.28733
			0.8595	320.58033	0.8595	503.0644	0.8595	739.11819	0.8595	776.82661	0.8595	705.87827	0.8595	653.43383
			0.8695	344.27459	0.8695	533.56122	0.8695	787.68577	0.8695	827.86129	0.8695	754.52229	0.8695	700.43878
			0.8795	369.63482	0.8795	564.20382	0.8795	837.046	0.8795	879.37155	0.8795	805.89809	0.8795	749.71691
			0.8895	396.84501	0.8895	595.37297	0.8895	887.46638	0.8895	931.61217	0.8895	860.7799	0.8895	801.91507
			0.8995	426.01557	0.8995	627.48195	0.8995	939.38995	0.8995	984.96815	0.8995	920.02265	0.8995	857.72682
			0.9095	457.53432	0.9095	661.36023	0.9095	993.69285	0.9095	1040.569	0.9095	985.0828	0.9095	918.72328
			0.9195	491.38146	0.9195	697.14084	0.9195	1050.59165	0.9195	1098.65817	0.9195	1056.74876	0.9195	985.63907
			0.92942	527.61359	0.92942	735.35456	0.92942	1110.62703	0.92942	1160.1925	0.92942	1136.3765	0.92942	1059.92781
			0.93942	566.33263	0.93942	776.74452	0.93942	1174.80255	0.93942	1226.34112	0.93942	1225.37155	0.93942	1143.28238
			0.94942	607.54423	0.94942	822.03114	0.94942	1243.89101	0.94942	1298.57466	0.94942	1325.339	0.94942	1237.34749
			0.95942	651.32201	0.95942	871.84855	0.95942	1319.01062	0.95942	1378.42887	0.95942	1438.11748	0.95942	1344.30432
			0.96942	697.60934	0.96942	926.61854	0.96942	1401.19745	0.96942	1467.24699	0.96942	1565.73248	0.96942	1466.29866
			0.97942	746.37792	0.97942	986.57749	0.97942	1491.25265	0.97942	1566.49682	0.97942	1710.31847	0.97942	1605.74664
			0.98942	797.63765	0.98942	1052.40057	0.98942	1590.62987	0.98942	1677.73531	0.98942	1874.67799	0.98942	1765.43524
			0.99942	851.53149	0.99942	1124.7799	0.99942	1700.46709	0.99942	1803.45364	0.99942	2062.12314	0.99942	1949.72399
			1.00942	907.68294	1.00942	1203.31493	1.00942	1820.50955	1.00942	1944.09059	1.00942	2276.44728	1.00942	2161.79759
			1.01942	966.01982	1.01942	1288.28025	1.01942	1952.2293	1.01942	2102.08068	1.01942	2524.71338	1.01942	2408.94551
			1.02942	1026.30432	1.02942	1379.02619	1.02942	2096.20665	1.02942	2280.19816	1.02942	2818.86766	1.02942	2701.84006
			1.03942	1088.60297	1.03942	1474.84784	1.03942	2254.45152	1.03942	2482.27884	1.03942	3180.92003	1.03942	3059.19321
			1.04942	1153.03043	1.04942	1574.01274	1.04942	2428.98797	1.04942	2714.49398	1.04942	3632.78132	1.04942	3510.85633
			1.05942	1219.2937	1.05942	1674.01274	1.05942	2621.65605	1.05942	2986.18542	1.05942	4177.99009	1.05942	4073.26256
			1.06942	1312.11182	1.06942	1814.81953	1.06942	2912.45577	1.06942	3416.15004	1.06942	4893.60226	1.06942	4843.25548
			1.07934	1393.45789	1.07934	1926.17127	1.07934	3196.85775	1.07934	3883.6235	1.07934	5553.75796	1.07934	5592.0736
			1.08934	1432.10191	1.08934	1958.03255	1.08934	3382.00991	1.08934	4257.523	1.08934	5960.12739	1.08934	6098.32979
			1.09934	1403.62916	1.09934	1876.00849	1.09934	3384.85492	1.09934	4399.80184	1.09934	5974.49398	1.09934	6196.51805
			1.08934	1292.09483	1.08934	1663.09979	1.08934	3141.21727	1.08934	4188.78981	1.08934	5532.03114	1.08934	5801.67021
			1.07934	1165.18896	1.07934	1444.57183	1.07934	2837.59377	1.07934	3845.36447	1.07934	4954.74876	1.07934	5241.55697
			1.06942	1033.44091	1.06942	1234.23071	1.06942	2503.90658	1.06942	3417.48054	1.06942	4321.20311	1.06942	4599.97169
			1.05942	909.37863	1.05942	1049.431	1.05942	2180.19816	1.05942	2971.62067	1.05942	3709.21444	1.05942	3964.18967
			1.04942	801.75655	1.04942	900.47275	1.04942	1896.29158	1.04942	2561.00495	1.04942	3172.11607	1.04942	3395.10262
			1.03942	707.76221	1.03942	778.17127	1.03942	1648.15287	1.03942	2193.31918	1.03942	2706.56759	1.03942	2895.01769
			1.02942	626.98231	1.02942	679.138	1.02942	1437.15499	1.02942	1877.05591	1.02942	2312.75301	1.02942	2467.431
			1.01942	557.14791	1.01942	597.84855	1.01942	1258.35103	1.01942	1609.21444	1.01942	1981.52866	1.01942	2104.40198
			1.00942	496.20241	1.00942	529.67728	1.00942	1106.06511	1.00942	1383.49045	1.00942	1702.37792	1.00942	1796.61713
			0.99942	442.91012	0.99942	472.03963	0.99942	976.70205	0.99942	1194.69498	0.99942	1467.33192	0.99942	1536.51805
			0.98942	395.96745	0.98942	422.51805	0.98942	866.03114	0.98942	1036.41614	0.98942	1269.03185	0.98942	1316.7431
			0.97942	354.54211	0.97942	379.55556	0.97942	771.05166	0.97942	903.55697	0.97942	1101.32484	0.97942	1131.32484
			0.96942	317.86695	0.96942	342.00991	0.96942	689.2017	0.96942	791.66313	0.96942	959.40269	0.96942	974.77849
			0.95942	285.36447	0.95942	309.00212	0.95942	618.3666	0.95942	697.15782	0.95942	839.26681	0.95942	842.82661
			0.94942	256.5322	0.94942	279.83298	0.94942	556.86341	0.94942	617.07006	0.94942	737.3758	0.94942	731.65605
			0.93942	230.92144	0.93942	253.88535	0.93942	503.16348	0.93942	548.85492	0.93942	650.78132	0.93942	637.8528
			0.92942	208.07926	0.92942	230.6143	0.92942	455.9264	0.92942	490.26752	0.92942	576.71054	0.92942	558.37084
			0.9195	187.7707	0.9195	209.72824	0.9195	414.32979	0.9195	439.80609	0.9195	513.3489	0.9195	491.03892
			0.9095	169.68011	0.9095	190.89738	0.9095	377.42392	0.9095	396.0368	0.9095	458.82661	0.9095	433.7707
			0.8995	153.56971	0.8995	173.8528	0.8995	344.50531	0.8995	357.82166	0.8995	411.66737	0.8995	384.86483
			0.8895	139.19618	0.8895	158.36093	0.8895	314.97523	0.8895	324.18967	0.8895	370.61713	0.8895	342.88747
			0.8795	126.31706	0.8795	144.20948	0.8795	288.30432	0.8795	294.29724	0.8795	334.54777	0.8795	306.52654
			0.8695	114.78386	0.8695	131.2603	0.8695	264.1557	0.8695	267.6235	0.8695	302.73461	0.8695	274.88889
			0.8595	104.43142	0.8595	119.42222	0.8595	242.19674	0.8595	243.66737	0.8595	274.45577	0.8595	247.19887
			0.8495	95.12272	0.8495	108.57707	0.8495	222.11323	0.8495	222.02265	0.8495	249.18471	0.8495	222.80821
			0.8395	86.71338	0.8395	98.5949	0.8395	203.66454	0.8395	202.32696	0.8395	226.42604	0.8395	201.17197
			0.82949	79.08379	0.82949	89.40241	0.82949	186.62987	0.82949	184.29158	0.82949	205.78061	0.82949	181.83581
			0.81949	72.14692	0.81949	80.91975	0.81949	170.84643	0.81949	167.72541	0.81949	187.01062	0.81949	164.44303
			0.80949	65.83185	0.80949	73.11139	0.80949	156.16277	0.80949	152.45294	0.80949	169.85704	0.80949	148.74593
			0.7995	60.08379	0.7995	65.92937	0.7995	142.46709	0.7995	138.36108	0.7995	154.14296	0.7995	134.50984
			0.78949	54.82137	0.78949	59.27629	0.78949	129.64544	0.78949	125.24657	0.78949	139.64133	0.78949	121.5087
			0.77957	50.02548	0.77957	53.17212	0.77957	117.69993	0.77957	113.09979	0.77957	126.26483	0.77957	109.62803
			0.76957	45.64218	0.76957	47.56645	0.76957	106.57565	0.76957	101.84232	0.76957	113.94041	0.76957	98.75216
			0.75957	41.64473	0.75957	42.4603	0.75957	96.17523	0.75957	91.41614	0.75957	102.57282	0.75957	88.79575
			0.74957	38.0041	0.74957	37.7966	0.74957	86.49271	0.74957	81.79844	0.74957	92.07657	0.74957	79.65534
			0.73957	34.6511	0.73957	33.55315	0.73957	77.4736	0.73957	72.88875	0.73957	82.39165	0.73957	71.24586
			0.72957	31.58854	0.72957	29.72895	0.72957	69.11621	0.72957	64.68238	0.72957	73.44006	0.72957	63.50432
			0.71957	28.78953	0.71957	26.29342	0.71957	61.4242	0.71957	57.14975	0.71957	65.19618	0.71957	56.40807
			0.70957	26.23595	0.70957	23.21515	0.70957	54.33319	0.70957	50.24572	0.70957	57.62633	0.70957	49.91706
			0.69957	23.90658	0.69957	20.43355	0.69957	47.79873	0.69957	43.9472	0.69957	50.65124	0.69957	43.95626
			0.68957	21.79958	0.68957	17.97792	0.68957	41.83808	0.68957	38.21939	0.68957	44.28903	0.68957	38.51861
			0.67957	19.90856	0.67957	15.82958	0.67957	36.44473	0.67957	33.05959	0.67957	38.49922	0.67957	33.5707
			0.66957	18.24218	0.66957	13.96551	0.66957	31.60807	0.66957	28.44685	0.66957	33.26681	0.66957	29.11621
			0.65957	16.75725	0.65957	12.31916	0.65957	27.30007	0.65957	24.35074	0.65957	28.57551	0.65957	25.12328
			0.64957	15.41401	0.64957	10.87585	0.64957	23.47035	0.64957	20.7523	0.64957	24.38655	0.64957	21.53942
			0.63965	14.19533	0.63965	9.64452	0.63965	20.09851	0.63965	17.59349	0.63965	20.69271	0.63965	18.37863
			0.62965	13.05468	0.62965	8.59103	0.62965	17.19264	0.62965	14.8719	0.62965	17.477	0.62965	15.61019
			0.61965	11.99745	0.61965	7.68365	0.61965	14.70701	0.61965	12.52082	0.61965	14.70205	0.61965	13.21335
			0.60965	11.02778	0.60965	6.88776	0.60965	12.6043	0.60965	10.5234	0.60965	12.31492	0.60965	11.12899
			0.59965	10.1518	0.59965	6.19543	0.59965	10.8199	0.59965	8.83949	0.59965	10.26965	0.59965	9.33635
			0.58965	9.37064	0.58965	5.59757	0.58965	9.31836	0.58965	7.40743	0.58965	8.52453	0.58965	7.82098
			0.57965	8.63806	0.57965	5.0567	0.57965	8.06427	0.57965	6.23505	0.57965	7.0631	0.57965	6.55033
			0.56965	7.92294	0.56965	4.53775	0.56965	7.02443	0.56965	5.23892	0.56965	5.84643	0.56965	5.4662
			0.55965	7.22641	0.55965	4.0687	0.55965	6.16488	0.55965	4.41628	0.55965	4.84061	0.55965	4.52357
			0.54965	6.55721	0.54965	3.63911	0.54965	5.40508	0.54965	3.7091	0.54965	3.99331	0.54965	3.72981
			0.53965	5.92252	0.53965	3.23471	0.53965	4.73071	0.53965	3.0894	0.53965	3.26469	0.53965	3.04954
			0.52965	5.3538	0.52965	2.8319	0.52965	4.12463	0.52965	2.56285	0.52965	2.63836	0.52965	2.47274
			0.51965	4.82821	0.51965	2.42018	0.51965	3.57629	0.51965	2.07224	0.51965	2.06572	0.51965	1.92989
			0.50965	4.29921	0.50965	2.01659	0.50965	3.07946	0.50965	1.64529	0.50965	1.56446	0.50965	1.42889
			0.49973	3.76321	0.49973	1.6287	0.49973	2.58941	0.49973	1.24428	0.49973	1.10307	0.49973	0.98258
			0.48973	3.18103	0.48973	1.22298	0.48973	2.07888	0.48973	0.85818	0.48973	0.67716	0.48973	0.57332
			0.47973	2.57456	0.47973	0.80448	0.47973	1.55966	0.47973	0.47585	0.47973	0.28442	0.47973	0.20157
			0.46973	1.98634	0.46973	0.37756	0.46973	1.04938	0.46973	0.08569	0.46973	-0.11588	0.46973	-0.19626
			0.45973	1.42651	0.45973	-0.04723	0.45973	0.56415	0.45973	-0.30594	0.45973	-0.51996	0.45973	-0.59863
			0.44973	0.90513	0.44973	-0.48758	0.44973	0.08997	0.44973	-0.69803	0.44973	-0.92946	0.44973	-0.99207
			0.43973	0.40377	0.43973	-0.94662	0.43973	-0.40266	0.43973	-1.07435	0.43973	-1.32886	0.43973	-1.362
			0.42973	-0.13924	0.42973	-1.38781	0.42973	-0.89206	0.42973	-1.44263	0.42973	-1.71145	0.42973	-1.70209
			0.41973	-0.68886	0.41973	-1.79522	0.41973	-1.36791	0.41973	-1.7753	0.41973	-2.04719	0.41973	-2.00488
			0.40973	-1.20698	0.40973	-2.15843	0.40973	-1.77233	0.40973	-2.07684	0.40973	-2.34028	0.40973	-2.27663
			0.39973	-1.65919	0.39973	-2.48061	0.39973	-2.10007	0.39973	-2.32454	0.39973	-2.57565	0.39973	-2.51178
			0.38973	-1.99996	0.38973	-2.71812	0.38973	-2.36081	0.38973	-2.5074	0.38973	-2.73176	0.38973	-2.67953
			0.37973	-2.26127	0.37973	-2.86473	0.37973	-2.55329	0.37973	-2.632	0.37973	-2.84198	0.37973	-2.78829
			0.36973	-2.46422	0.36973	-2.93788	0.36973	-2.69962	0.36973	-2.6913	0.36973	-2.87967	0.36973	-2.82371
			0.35973	-2.62297	0.35973	-2.96279	0.35973	-2.77338	0.35973	-2.73287	0.35973	-2.87442	0.35973	-2.79677
			0.34981	-2.74903	0.34981	-2.94752	0.34981	-2.76675	0.34981	-2.7257	0.34981	-2.83114	0.34981	-2.74542
			0.33981	-2.81342	0.33981	-2.89222	0.33981	-2.70476	0.33981	-2.68534	0.33981	-2.7528	0.33981	-2.67877
			0.32981	-2.82166	0.32981	-2.82832	0.32981	-2.6248	0.32981	-2.63091	0.32981	-2.68106	0.32981	-2.6073
			0.31981	-2.76337	0.31981	-2.76171	0.31981	-2.56369	0.31981	-2.54756	0.31981	-2.60655	0.31981	-2.54245
			0.30981	-2.68807	0.30981	-2.67788	0.30981	-2.50208	0.30981	-2.47472	0.30981	-2.53384	0.30981	-2.4694
			0.29981	-2.61816	0.29981	-2.58946	0.29981	-2.44163	0.29981	-2.39548	0.29981	-2.46469	0.29981	-2.3832
			0.2898	-2.56846	0.2898	-2.50119	0.2898	-2.35638	0.2898	-2.32628	0.2898	-2.38974	0.2898	-2.29309
			0.27981	-2.52795	0.27981	-2.44732	0.27981	-2.26028	0.27981	-2.2628	0.27981	-2.32464	0.27981	-2.20869
			0.26981	-2.46859	0.26981	-2.38906	0.26981	-2.19643	0.26981	-2.2156	0.26981	-2.26208	0.26981	-2.15793
			0.25981	-2.40827	0.25981	-2.33018	0.25981	-2.1659	0.25981	-2.17699	0.25981	-2.20957	0.25981	-2.14033
			0.24981	-2.32981	0.24981	-2.28476	0.24981	-2.1616	0.24981	-2.13379	0.24981	-2.17383	0.24981	-2.12662
			0.2398	-2.28822	0.2398	-2.25591	0.2398	-2.16616	0.2398	-2.11045	0.2398	-2.1415	0.2398	-2.11364
			0.22981	-2.27839	0.22981	-2.23155	0.22981	-2.15466	0.22981	-2.07219	0.22981	-2.1304	0.22981	-2.09607
			0.21981	-2.28558	0.21981	-2.18998	0.21981	-2.13189	0.21981	-2.05902	0.21981	-2.12497	0.21981	-2.07331
			0.20988	-2.30745	0.20988	-2.1718	0.20988	-2.12326	0.20988	-2.0374	0.20988	-2.12311	0.20988	-2.06548
			0.19988	-2.31696	0.19988	-2.17455	0.19988	-2.13176	0.19988	-2.02115	0.19988	-2.12402	0.19988	-2.05377
			0.18988	-2.31808	0.18988	-2.18	0.18988	-2.15912	0.18988	-2.02923	0.18988	-2.11847	0.18988	-2.0479
			0.17988	-2.31243	0.17988	-2.17943	0.17988	-2.20153	0.17988	-2.02067	0.17988	-2.1218	0.17988	-2.06163
			0.16988	-2.32333	0.16988	-2.18497	0.16988	-2.22846	0.16988	-2.04235	0.16988	-2.12712	0.16988	-2.09101
			0.15988	-2.36064	0.15988	-2.22044	0.15988	-2.23462	0.15988	-2.05319	0.15988	-2.14838	0.15988	-2.13393
			0.14988	-2.43505	0.14988	-2.2487	0.14988	-2.26025	0.14988	-2.078	0.14988	-2.17744	0.14988	-2.16139
			0.13988	-2.52156	0.13988	-2.2725	0.13988	-2.29751	0.13988	-2.11022	0.13988	-2.20159	0.13988	-2.17355
			0.12988	-2.58249	0.12988	-2.2985	0.12988	-2.36134	0.12988	-2.1405	0.12988	-2.24566	0.12988	-2.19643
			0.11988	-2.62151	0.11988	-2.35151	0.11988	-2.4233	0.11988	-2.16989	0.11988	-2.28091	0.11988	-2.22265
			0.10988	-2.65285	0.10988	-2.3879	0.10988	-2.46221	0.10988	-2.20553	0.10988	-2.32638	0.10988	-2.26184
			0.09988	-2.69298	0.09988	-2.42405	0.09988	-2.50883	0.09988	-2.25162	0.09988	-2.37002	0.09988	-2.30229
			0.08988	-2.76671	0.08988	-2.46637	0.08988	-2.54326	0.08988	-2.3031	0.08988	-2.41115	0.08988	-2.34301
			0.07988	-2.86007	0.07988	-2.51657	0.07988	-2.60849	0.07988	-2.36214	0.07988	-2.47006	0.07988	-2.40171
			0.06996	-2.9582	0.06996	-2.58255	0.06996	-2.6785	0.06996	-2.39791	0.06996	-2.53165	0.06996	-2.4697
			0.05996	-3.05323	0.05996	-2.62617	0.05996	-2.75662	0.05996	-2.44788	0.05996	-2.59689	0.05996	-2.53871
			0.04996	-3.12195	0.04996	-2.6882	0.04996	-2.82726	0.04996	-2.47942	0.04996	-2.66473	0.04996	-2.59305
			0.03996	-3.17197	0.03996	-2.75507	0.03996	-2.86287	0.03996	-2.53322	0.03996	-2.73234	0.03996	-2.63138
			0.02996	-3.21519	0.02996	-2.81318	0.02996	-2.91217	0.02996	-2.58478	0.02996	-2.80033	0.02996	-2.65687
			0.01996	-3.28096	0.01996	-2.85976	0.01996	-2.96341	0.01996	-2.63281	0.01996	-2.87432	0.01996	-2.69145
			0.00996	-3.37406	0.00996	-2.89699	0.00996	-3.03759	0.00996	-2.7031	0.00996	-2.93929	0.00996	-2.73745
			-3.91006E-5	-3.49791	-3.91006E-5	-2.96679	-3.91006E-5	-3.12907	-3.91006E-5	-2.74076	-3.91006E-5	-2.99592	-3.91006E-5	-2.79856
			-0.01004	-3.61393	-0.01004	-3.02347	-0.01004	-3.19987	-0.01004	-2.80086	-0.01004	-3.04502	-0.01004	-2.87414
			-0.02004	-3.71597	-0.02004	-3.08304	-0.02004	-3.26269	-0.02004	-2.84892	-0.02004	-3.08839	-0.02004	-2.96606
			-0.03004	-3.78095	-0.03004	-3.13427	-0.03004	-3.31471	-0.03004	-2.90593	-0.03004	-3.14672	-0.03004	-3.05534
			-0.04004	-3.81673	-0.04004	-3.19021	-0.04004	-3.35244	-0.04004	-2.97871	-0.04004	-3.214	-0.04004	-3.12173
			-0.05004	-3.85625	-0.05004	-3.2586	-0.05004	-3.41387	-0.05004	-3.03231	-0.05004	-3.26988	-0.05004	-3.17761
			-0.06004	-3.90067	-0.06004	-3.30831	-0.06004	-3.4858	-0.06004	-3.10006	-0.06004	-3.32283	-0.06004	-3.22406
			-0.06996	-3.98147	-0.06996	-3.35533	-0.06996	-3.56256	-0.06996	-3.14929	-0.06996	-3.39162	-0.06996	-3.28262
			-0.07996	-4.09766	-0.07996	-3.41844	-0.07996	-3.65638	-0.07996	-3.21322	-0.07996	-3.46149	-0.07996	-3.34497
			-0.08996	-4.2183	-0.08996	-3.47588	-0.08996	-3.74586	-0.08996	-3.2734	-0.08996	-3.54338	-0.08996	-3.40839
