# Supplementary material for: The methanol electrooxidation activity and the CO-resilient surface of a La x Fe 1− y − z Cu y Pd z O 3 perovskite
Source: Royal Society of Chemistry journal article supplement (doi:10.1039/d5ta04846j), 2026-01-01
Supplement: d5ta04846j7.xlsx [file d5ta04846j7.xlsx]

## Sheet: Feuil1
		c MeOH	2 M
		E	j	E	j	E	j	E	j	E	j	E	j	E	j	E	j	E	j	E	j	E	j	E	j	E	j
		V	µA/cm^2	V	µA/cm^2	V	µA/cm^2	V	µA/cm^2	V	µA/cm^2	V	µA/cm^2	V	µA/cm^2	V	µA/cm^2	V	µA/cm^2	V	µA/cm^2	V	µA/cm^2	V	µA/cm^2	V	µA/cm^2
		Supporting electrolyte 10 mv/s	Supporting electrolyte 10 mv/s	10 mV/s	10 mV/s	100 mV/s	100 mV/s	150 mV/s	150 mV/s	200 mV/s	200 mV/s	250 mV/s	250 mV/s	300 mV/s	300 mV/s	350 mV/s	350 mV/s	400 mV/s	400 mV/s	450 mV/s	450 mV/s	500 mV/s	500 mV/s	550 mV/s	550 mV/s	600 mV/s	600 mV/s
		-0.09996	-1.01239	-0.09996	-1.04614	-0.09996	-1.04614	-0.09996	-1.51858	-0.09996	-1.85605	-0.09996	-2.53098	-0.09996	-0.84366	-0.09996	-0.37121	-0.09996	0.57369	-0.09996	-2.53098	-0.09996	-4.69076	-0.09996	-4.96072	-0.09996	0.64118
		-0.08996	-0.68223	-0.08996	-0.76185	-0.08996	0.03024	-0.08996	0.00131	-0.08996	0.03608	-0.08996	0.35134	-0.08996	1.8093	-0.08996	1.94926	-0.08996	2.63674	-0.08996	1.1747	-0.08996	1.59076	-0.08996	0.95381	-0.08996	4.85933
		-0.07996	-0.53157	-0.07996	-0.51307	-0.07996	0.92954	-0.07996	1.2842	-0.07996	1.60899	-0.07996	2.01711	-0.07996	4.02205	-0.07996	3.77631	-0.07996	4.95918	-0.07996	4.46072	-0.07996	6.29942	-0.07996	6.01761	-0.07996	8.42067
		-0.06996	-0.41103	-0.06996	-0.33053	-0.06996	1.60759	-0.06996	2.23052	-0.06996	2.75374	-0.06996	4.03897	-0.06996	5.63431	-0.06996	5.868	-0.06996	6.29503	-0.06996	5.97347	-0.06996	8.71498	-0.06996	9.66872	-0.06996	10.92672
		-0.06004	-0.25347	-0.06004	-0.19078	-0.06004	2.14592	-0.06004	2.998	-0.06004	3.68068	-0.06004	5.29103	-0.06004	6.94076	-0.06004	7.60955	-0.06004	7.91802	-0.06004	7.98696	-0.06004	10.51011	-0.06004	12.09667	-0.06004	12.94696
		-0.05004	-0.0594	-0.05004	-0.06852	-0.05004	2.59533	-0.05004	3.60255	-0.05004	4.42096	-0.05004	5.82476	-0.05004	8.005	-0.05004	9.09791	-0.05004	8.91676	-0.05004	9.58129	-0.05004	12.21272	-0.05004	13.83642	-0.05004	14.43284
		-0.04004	0.17856	-0.04004	0.01622	-0.04004	2.96449	-0.04004	4.09086	-0.04004	5.04708	-0.04004	6.99131	-0.04004	8.90442	-0.04004	10.13442	-0.04004	10.06893	-0.04004	10.7602	-0.04004	13.72664	-0.04004	15.22534	-0.04004	15.58783
		-0.03004	0.26555	-0.03004	0.0915	-0.03004	3.30013	-0.03004	4.54776	-0.03004	5.57411	-0.03004	7.09369	-0.03004	9.71635	-0.03004	10.50221	-0.03004	10.861	-0.03004	12.80863	-0.03004	14.3966	-0.03004	16.44147	-0.03004	16.62746
		-0.02004	0.26214	-0.02004	0.15609	-0.02004	3.60592	-0.02004	4.98262	-0.02004	6.05901	-0.02004	7.90392	-0.02004	10.4718	-0.02004	10.98139	-0.02004	11.86279	-0.02004	13.78074	-0.02004	14.2518	-0.02004	16.81656	-0.02004	17.52668
		-0.01004	0.31371	-0.01004	0.20334	-0.01004	3.88504	-0.01004	5.39462	-0.01004	6.52008	-0.01004	8.73994	-0.01004	11.20604	-0.01004	11.27585	-0.01004	12.59045	-0.01004	14.93475	-0.01004	14.31125	-0.01004	16.23524	-0.01004	18.41062
		-3.91006E-5	0.42278	-3.91006E-5	0.24494	-3.91006E-5	4.15816	-3.91006E-5	5.8033	-3.91006E-5	6.97459	-3.91006E-5	8.64566	-3.91006E-5	11.91561	-3.91006E-5	11.97803	-3.91006E-5	13.55224	-3.91006E-5	15.95272	-3.91006E-5	14.99604	-3.91006E-5	15.45166	-3.91006E-5	19.22236
		0.00996	0.60664	0.00996	0.28513	0.00996	4.42661	0.00996	6.19631	0.00996	7.44023	0.00996	9.65832	0.00996	12.58561	0.00996	12.6167	0.00996	14.1598	0.00996	16.62647	0.00996	17.27615	0.00996	15.24699	0.00996	20.01953
		0.01996	0.84386	0.01996	0.33097	0.01996	4.69407	0.01996	6.59272	0.01996	7.87965	0.01996	9.91895	0.01996	13.24045	0.01996	12.97527	0.01996	15.046	0.01996	17.53206	0.01996	18.25888	0.01996	16.39179	0.01996	20.82463
		0.02996	0.93227	0.02996	0.36832	0.02996	4.96255	0.02996	6.98798	0.02996	8.31803	0.02996	10.45451	0.02996	13.86946	0.02996	14.07604	0.02996	15.60382	0.02996	18.33786	0.02996	18.26539	0.02996	18.50602	0.02996	21.64232
		0.03996	0.93286	0.03996	0.40039	0.03996	5.22524	0.03996	7.36217	0.03996	8.72967	0.03996	11.44835	0.03996	14.51663	0.03996	15.30998	0.03996	16.49441	0.03996	19.03992	0.03996	18.45294	0.03996	20.69455	0.03996	22.43015
		0.04996	0.9865	0.04996	0.43903	0.04996	5.49732	0.04996	7.74045	0.04996	9.14249	0.04996	11.21507	0.04996	15.15456	0.04996	16.19929	0.04996	17.05732	0.04996	19.85039	0.04996	18.80948	0.04996	22.36221	0.04996	23.12753
		0.05996	1.09687	0.05996	0.45829	0.05996	5.77809	0.05996	8.1257	0.05996	9.56071	0.05996	12.20282	0.05996	15.77197	0.05996	16.89427	0.05996	17.87657	0.05996	20.58839	0.05996	20.94211	0.05996	23.54084	0.05996	23.80085
		0.06996	1.2815	0.06996	0.4705	0.06996	6.07255	0.06996	8.50771	0.06996	9.9771	0.06996	12.65159	0.06996	16.369	0.06996	16.95655	0.06996	18.42463	0.06996	21.2712	0.06996	22.09795	0.06996	24.61458	0.06996	24.45464
		0.07988	1.51888	0.07988	0.49853	0.07988	6.36402	0.07988	8.91275	0.07988	10.40817	0.07988	12.91812	0.07988	16.94636	0.07988	17.3564	0.07988	19.22335	0.07988	22.02873	0.07988	22.01939	0.07988	25.6913	0.07988	25.06454
		0.08988	1.546	0.08988	0.51853	0.08988	6.62607	0.08988	9.28762	0.08988	10.8265	0.08988	13.90306	0.08988	17.51479	0.08988	17.40028	0.08988	19.78429	0.08988	22.7564	0.08988	22.26638	0.08988	26.48648	0.08988	25.65138
		0.09988	1.63448	0.09988	0.55964	0.09988	6.88664	0.09988	9.68478	0.09988	11.25222	0.09988	13.72887	0.09988	18.06737	0.09988	18.3046	0.09988	20.55301	0.09988	23.48535	0.09988	22.62604	0.09988	26.35598	0.09988	26.16971
		0.10988	1.7713	0.10988	0.59426	0.10988	7.14017	0.10988	10.07646	0.10988	11.69141	0.10988	14.60878	0.10988	18.60524	0.10988	19.34183	0.10988	21.07785	0.10988	24.23623	0.10988	24.36943	0.10988	25.60453	0.10988	26.75471
		0.11988	1.89469	0.11988	0.63893	0.11988	7.42828	0.11988	10.45618	0.11988	12.13145	0.11988	15.28068	0.11988	19.11493	0.11988	20.34452	0.11988	21.80495	0.11988	24.9707	0.11988	25.64119	0.11988	24.87771	0.11988	27.41047
		0.12988	2.16282	0.12988	0.68248	0.12988	7.71827	0.12988	10.86695	0.12988	12.58665	0.12988	15.32144	0.12988	19.65322	0.12988	21.09653	0.12988	22.35598	0.12988	25.70786	0.12988	25.40694	0.12988	24.98471	0.12988	28.07714
		0.13988	2.36054	0.13988	0.72369	0.13988	8.00433	0.13988	11.25282	0.13988	13.04978	0.13988	16.33546	0.13988	20.15895	0.13988	21.25209	0.13988	23.07233	0.13988	26.47473	0.13988	25.54367	0.13988	26.43949	0.13988	28.77608
		0.14988	2.54348	0.14988	0.7826	0.14988	8.29074	0.14988	11.66246	0.14988	13.52142	0.14988	16.40127	0.14988	20.6879	0.14988	21.62095	0.14988	23.61826	0.14988	27.13206	0.14988	26.21132	0.14988	28.52994	0.14988	29.43071
		0.15988	2.83795	0.15988	0.83813	0.15988	8.56334	0.15988	12.07465	0.15988	14.02323	0.15988	17.09087	0.15988	21.2075	0.15988	21.61571	0.15988	24.35697	0.15988	27.82958	0.15988	27.70545	0.15988	30.58528	0.15988	30.09243
		0.16988	3.03924	0.16988	0.90606	0.16988	8.86243	0.16988	12.4769	0.16988	14.55103	0.16988	17.99292	0.16988	21.73008	0.16988	22.60977	0.16988	24.94282	0.16988	28.52866	0.16988	28.97551	0.16988	32.05223	0.16988	30.80396
		0.17988	3.22553	0.17988	0.9849	0.17988	9.15819	0.17988	12.91105	0.17988	15.09823	0.17988	17.82817	0.17988	22.26553	0.17988	23.50602	0.17988	25.68776	0.17988	29.14112	0.17988	29.22987	0.17988	33.20764	0.17988	31.52569
		0.18988	3.51757	0.18988	1.06481	0.18988	9.47809	0.18988	13.34752	0.18988	15.66228	0.18988	18.89469	0.18988	22.80807	0.18988	24.10007	0.18988	26.26653	0.18988	29.89257	0.18988	29.74692	0.18988	34.23553	0.18988	32.28478
		0.19988	3.65531	0.19988	1.15343	0.19988	9.81732	0.19988	13.80018	0.19988	16.23482	0.19988	19.23992	0.19988	23.38259	0.19988	25.39207	0.19988	26.97948	0.19988	30.55994	0.19988	30.80835	0.19988	35.34423	0.19988	32.99943
		0.20988	3.92849	0.20988	1.23796	0.20988	10.1722	0.20988	14.26398	0.20988	16.83977	0.20988	19.72923	0.20988	23.96787	0.20988	26.12243	0.20988	27.54579	0.20988	31.18641	0.20988	32.35018	0.20988	35.79632	0.20988	33.79122
		0.21981	4.3027	0.21981	1.33785	0.21981	10.56321	0.21981	14.74777	0.21981	17.46865	0.21981	20.81713	0.21981	24.56461	0.21981	27.0167	0.21981	28.34437	0.21981	32.40099	0.21981	33.24105	0.21981	35.24728	0.21981	34.6
		0.22981	4.57587	0.22981	1.45217	0.22981	10.96546	0.22981	15.2385	0.22981	18.11875	0.22981	20.65166	0.22981	25.1472	0.22981	27.67771	0.22981	29.00651	0.22981	32.55428	0.22981	33.65364	0.22981	34.33815	0.22981	35.4276
		0.2398	4.81798	0.2398	1.58164	0.2398	11.37796	0.2398	15.75343	0.2398	18.77084	0.2398	21.74777	0.2398	25.71663	0.2398	27.72413	0.2398	29.84345	0.2398	32.68634	0.2398	34.1104	0.2398	33.80821	0.2398	36.27912
		0.24981	4.95943	0.24981	1.71958	0.24981	11.81861	0.24981	16.27219	0.24981	19.45732	0.24981	22.38882	0.24981	26.29795	0.24981	28.2201	0.24981	30.61217	0.24981	33.36221	0.24981	34.99434	0.24981	34.67997	0.24981	37.07389
		0.25981	5.06851	0.25981	1.87612	0.25981	12.27081	0.25981	16.80764	0.25981	20.18783	0.25981	22.70149	0.25981	26.88917	0.25981	28.36504	0.25981	31.41345	0.25981	33.21203	0.25981	36.71621	0.25981	36.73418	0.25981	37.92795
		0.26981	5.30641	0.26981	2.04069	0.26981	12.73942	0.26981	17.36844	0.26981	20.93616	0.26981	23.86454	0.26981	27.48917	0.26981	29.45648	0.26981	32.21189	0.26981	34.39038	0.26981	38.29682	0.26981	39.0644	0.26981	38.77976
		0.27981	5.59197	0.27981	2.20065	0.27981	13.22422	0.27981	17.92116	0.27981	21.72017	0.27981	23.90078	0.27981	28.12201	0.27981	30.71125	0.27981	33.03723	0.27981	35.35103	0.27981	38.69965	0.27981	41.03723	0.27981	39.62392
		0.2898	5.89132	0.2898	2.37408	0.2898	13.71928	0.2898	18.49384	0.2898	22.46837	0.2898	24.94636	0.2898	28.73121	0.2898	31.9063	0.2898	33.84246	0.2898	35.66695	0.2898	38.86058	0.2898	42.43864	0.2898	40.50955
		0.29981	6.239	0.29981	2.54725	0.29981	14.24487	0.29981	19.0736	0.29981	23.22548	0.29981	25.91592	0.29981	29.3949	0.29981	32.86865	0.29981	34.69752	0.29981	36.99165	0.29981	38.90814	0.29981	43.70545	0.29981	41.41713
		0.30981	6.50381	0.30981	2.7327	0.30981	14.81727	0.30981	19.6988	0.30981	24.01373	0.30981	26.09568	0.30981	30.07091	0.30981	33.21883	0.30981	35.58231	0.30981	38.07827	0.30981	40.11323	0.30981	44.98556	0.30981	42.36858
		0.31981	6.88248	0.31981	2.9263	0.31981	15.41642	0.31981	20.35612	0.31981	24.77735	0.31981	27.38174	0.31981	30.78372	0.31981	33.83086	0.31981	36.42109	0.31981	38.55173	0.31981	42.58967	0.31981	46.12272	0.31981	43.3397
		0.32981	7.32219	0.32981	3.14018	0.32981	16.0402	0.32981	21.03581	0.32981	25.59448	0.32981	27.7782	0.32981	31.51182	0.32981	34.08011	0.32981	37.4	0.32981	39.88365	0.32981	43.30361	0.32981	46.45916	0.32981	44.31507
		0.33981	7.85611	0.33981	3.37264	0.33981	16.6896	0.33981	21.73503	0.33981	26.41642	0.33981	28.67686	0.33981	32.23836	0.33981	35.36079	0.33981	38.26497	0.33981	41.04161	0.33981	43.62491	0.33981	46.0167	0.33981	45.26822
		0.34981	8.36374	0.34981	3.6058	0.34981	17.36815	0.34981	22.44303	0.34981	27.26837	0.34981	29.98174	0.34981	32.98259	0.34981	36.63171	0.34981	39.28691	0.34981	41.69823	0.34981	43.9741	0.34981	45.46525	0.34981	46.27318
		0.35973	8.83066	0.35973	3.83516	0.35973	18.06766	0.35973	23.17721	0.35973	28.16377	0.35973	30.06978	0.35973	33.75442	0.35973	37.58754	0.35973	40.26313	0.35973	43.03114	0.35973	45.04798	0.35973	45.66256	0.35973	47.32399
		0.36973	9.26917	0.36973	4.07472	0.36973	18.79986	0.36973	23.93192	0.36973	29.06214	0.36973	31.52328	0.36973	34.56532	0.36973	39.29625	0.36973	41.34437	0.36973	44.21415	0.36973	47.75456	0.36973	47.3121	0.36973	48.45195
		0.37973	9.85639	0.37973	4.3357	0.37973	19.57113	0.37973	24.72739	0.37973	29.99122	0.37973	32.33602	0.37973	35.43765	0.37973	40.4167	0.37973	42.40637	0.37973	45.04614	0.37973	48.77028	0.37973	49.86058	0.37973	49.64091
		0.38973	10.4735	0.38973	4.62416	0.38973	20.37523	0.38973	25.55145	0.38973	30.92725	0.38973	33.14253	0.38973	36.37721	0.38973	41.662	0.38973	43.55584	0.38973	46.3356	0.38973	49.20623	0.38973	52.54763	0.38973	50.92074
		0.39973	11.12469	0.39973	4.92333	0.39973	21.24812	0.39973	26.42916	0.39973	31.89625	0.39973	34.72144	0.39973	37.36532	0.39973	42.76221	0.39973	44.63071	0.39973	47.72442	0.39973	49.86185	0.39973	54.69597	0.39973	52.29483
		0.40973	11.80048	0.40973	5.23993	0.40973	22.15824	0.40973	27.35258	0.40973	32.89936	0.40973	34.99873	0.40973	38.4494	0.40973	43.23892	0.40973	45.80991	0.40973	48.81359	0.40973	51.02265	0.40973	56.45931	0.40973	53.69059
		0.41973	12.47608	0.41973	5.59517	0.41973	23.10502	0.41973	28.3397	0.41973	33.93588	0.41973	36.57948	0.41973	39.53362	0.41973	44.25464	0.41973	46.89356	0.41973	50.12215	0.41973	53.99406	0.41973	58.17396	0.41973	55.18627
		0.42973	13.15513	0.42973	5.96549	0.42973	24.09965	0.42973	29.38485	0.42973	35.03284	0.42973	37.84912	0.42973	40.71111	0.42973	44.9949	0.42973	48.23043	0.42973	51.79958	0.42973	55.54692	0.42973	60.05308	0.42973	56.69823
		0.43973	13.77199	0.43973	6.35414	0.43973	25.15881	0.43973	30.49073	0.43973	36.18061	0.43973	38.70134	0.43973	41.93107	0.43973	46.72258	0.43973	49.4385	0.43973	53.20425	0.43973	56.31125	0.43973	61.51904	0.43973	58.36065
		0.44973	14.47488	0.44973	6.77315	0.44973	26.31309	0.44973	31.66299	0.44973	37.38938	0.44973	40.59207	0.44973	43.22038	0.44973	48.74041	0.44973	51.01401	0.44973	54.67473	0.44973	57.36108	0.44973	62.09866	0.44973	60.16391
		0.45973	15.19929	0.45973	7.22518	0.45973	27.53645	0.45973	32.87544	0.45973	38.61316	0.45973	41.43015	0.45973	44.59816	0.45973	50.69908	0.45973	52.44473	0.45973	56.67176	0.45973	58.75159	0.45973	62.21642	0.45973	62.03524
		0.46973	16.02406	0.46973	7.72222	0.46973	28.82817	0.46973	34.13984	0.46973	39.85619	0.46973	43.17792	0.46973	46.01118	0.46973	52.47742	0.46973	54.23539	0.46973	58.33277	0.46973	62.10998	0.46973	62.59646	0.46973	64.03015
		0.47973	17.07657	0.47973	8.23261	0.47973	30.16207	0.47973	35.44388	0.47973	41.12569	0.47973	45.01769	0.47973	47.52413	0.47973	53.67856	0.47973	55.86426	0.47973	59.96787	0.47973	64.39179	0.47973	64.27544	0.47973	66.11479
		0.48973	18.07587	0.48973	8.79241	0.48973	31.56405	0.48973	36.8235	0.48973	42.46681	0.48973	45.96801	0.48973	49.11791	0.48973	55.20552	0.48973	57.80977	0.48973	62.28379	0.48973	65.61019	0.48973	67.23595	0.48973	68.29172
		0.49973	19.20453	0.49973	9.42068	0.49973	33.03539	0.49973	38.27714	0.49973	43.8828	0.49973	48.18188	0.49973	50.80453	0.49973	56.69809	0.49973	59.54593	0.49973	64.2402	0.49973	67.16051	0.49973	70.78684	0.49973	70.58217
		0.50965	20.25421	0.50965	10.12435	0.50965	34.58967	0.50965	39.8218	0.50965	45.3816	0.50965	49.64713	0.50965	52.585	0.50965	58.62236	0.50965	61.67742	0.50965	65.99873	0.50965	68.78726	0.50965	74.20793	0.50965	73.02335
		0.51965	21.37084	0.51965	10.9212	0.51965	36.2351	0.51965	41.44076	0.51965	47.00184	0.51965	51.53036	0.51965	54.47219	0.51965	60.61953	0.51965	63.64643	0.51965	68.57636	0.51965	72.37962	0.51965	77.13503	0.51965	75.54168
		0.52965	22.68648	0.52965	11.80367	0.52965	37.98641	0.52965	43.17141	0.52965	48.73178	0.52965	53.98669	0.52965	56.47049	0.52965	62.81118	0.52965	66.01062	0.52965	70.84558	0.52965	75.41231	0.52965	79.99165	0.52965	78.17863
		0.53965	24.12824	0.53965	12.84352	0.53965	39.89441	0.53965	45.0569	0.53965	50.62166	0.53965	55.28875	0.53965	58.62873	0.53965	65.05775	0.53965	68.21783	0.53965	72.89498	0.53965	77.1632	0.53965	82.908	0.53965	80.90403
		0.54965	25.77282	0.54965	14.07248	0.54965	41.94904	0.54965	47.06865	0.54965	52.64459	0.54965	58.03581	0.54965	60.93701	0.54965	67.7196	0.54965	70.81798	0.54965	75.9673	0.54965	79.42024	0.54965	85.82661	0.54965	83.66582
		0.55965	27.41614	0.55965	15.52767	0.55965	44.2184	0.55965	49.26016	0.55965	54.84515	0.55965	60.37282	0.55965	63.40481	0.55965	70.17226	0.55965	73.28422	0.55965	78.68464	0.55965	81.6494	0.55965	88.22151	0.55965	86.65577
		0.56965	29.35768	0.56965	17.29342	0.56965	46.71083	0.56965	51.6661	0.56965	57.27077	0.56965	62.74706	0.56965	66.11267	0.56965	72.73447	0.56965	76.23737	0.56965	81.18061	0.56965	85.79476	0.56965	89.80212	0.56965	89.91493
		0.57965	31.38103	0.57965	19.4426	0.57965	49.50078	0.57965	54.34324	0.57965	59.96617	0.57965	66.17679	0.57965	69.08266	0.57965	76.1063	0.57965	79.16221	0.57965	84.94452	0.57965	90.04119	0.57965	91.43171	0.57965	93.48889
		0.58965	33.47884	0.58965	22.12116	0.58965	52.63142	0.58965	57.38132	0.58965	63.00127	0.58965	68.68988	0.58965	72.39788	0.58965	79.45492	0.58965	82.75301	0.58965	88.47403	0.58965	92.97141	0.58965	93.98995	0.58965	97.41996
		0.59965	35.79561	0.59965	25.43185	0.59965	56.17962	0.59965	60.81146	0.59965	66.43241	0.59965	72.69667	0.59965	76.11592	0.59965	83.21755	0.59965	86.46327	0.59965	91.85548	0.59965	96.51621	0.59965	98.25081	0.59965	101.67587
		0.60965	38.25322	0.60965	29.492	0.60965	60.24742	0.60965	64.71621	0.60965	70.34791	0.60965	76.95598	0.60965	80.31111	0.60965	87.43312	0.60965	90.95598	0.60965	96.75725	0.60965	100.20212	0.60965	104.01189	0.60965	106.39774
		0.61965	40.98528	0.61965	34.48195	0.61965	64.92711	0.61965	69.20764	0.61965	74.81812	0.61965	81.10856	0.61965	85.08209	0.61965	92.28365	0.61965	95.69611	0.61965	101.70064	0.61965	105.94636	0.61965	110.44232	0.61965	111.64076
		0.62965	44.12725	0.62965	40.57226	0.62965	70.35357	0.62965	74.39448	0.62965	80.01472	0.62965	86.92994	0.62965	90.55032	0.62965	97.73404	0.62965	101.52116	0.62965	106.65817	0.62965	112.67318	0.62965	117.02972	0.62965	117.57042
		0.63965	47.46426	0.63965	47.91904	0.63965	76.5782	0.63965	80.36872	0.63965	86.00637	0.63965	92.59023	0.63965	96.7758	0.63965	103.78627	0.63965	107.70602	0.63965	113.58995	0.63965	118.54536	0.63965	123.93843	0.63965	124.24501
		0.64957	51.14211	0.64957	56.66143	0.64957	83.74154	0.64957	87.26299	0.64957	92.91635	0.64957	99.73786	0.64957	103.87289	0.64957	111.22803	0.64957	115.22222	0.64957	120.92965	0.64957	125.43567	0.64957	131.65888	0.64957	131.8719
		0.65957	55.32682	0.65957	66.96093	0.65957	91.94452	0.65957	95.17013	0.65957	100.87643	0.65957	108.16079	0.65957	112.00948	0.65957	119.26808	0.65957	123.29611	0.65957	128.50616	0.65957	132.96745	0.65957	140.35343	0.65957	140.56348
		0.66957	59.8988	0.66957	78.95725	0.66957	101.32427	0.66957	104.25265	0.66957	109.98698	0.66957	116.63708	0.66957	121.29342	0.66957	128.39193	0.66957	132.93815	0.66957	138.53206	0.66957	143.0276	0.66957	150.02548	0.66957	150.47134
		0.67957	65.24586	0.67957	92.83765	0.67957	112.04275	0.67957	114.68393	0.67957	120.45902	0.67957	127.61868	0.67957	131.95541	0.67957	139.17608	0.67957	143.61642	0.67957	149.48337	0.67957	155.21019	0.67957	160.04529	0.67957	161.8075
		0.68957	71.20142	0.68957	108.57594	0.68957	124.10743	0.68957	126.50432	0.68957	132.36476	0.68957	139.40283	0.68957	144.03539	0.68957	151.26681	0.68957	156.05237	0.68957	160.99788	0.68957	167.16914	0.68957	170.92144	0.68957	174.52654
		0.69957	77.74947	0.69957	126.18117	0.69957	137.63652	0.69957	139.83284	0.69957	145.80184	0.69957	152.78556	0.69957	157.67728	0.69957	164.97948	0.69957	169.66454	0.69957	175.47063	0.69957	180.66808	0.69957	183.431	0.69957	188.84643
		0.70957	85.16985	0.70957	145.69851	0.70957	152.73036	0.70957	154.77424	0.70957	160.93135	0.70957	168.52512	0.70957	173.07573	0.70957	180.29016	0.70957	185.38995	0.70957	191.23142	0.70957	195.49186	0.70957	198.4586	0.70957	204.93701
		0.71957	93.60849	0.71957	167.13659	0.71957	169.48195	0.71957	171.47488	0.71957	177.87827	0.71957	184.85067	0.71957	190.35669	0.71957	197.81883	0.71957	202.69073	0.71957	207.9448	0.71957	213.35173	0.71957	216.73036	0.71957	222.99646
		0.72957	103.1816	0.72957	190.5322	0.72957	188.0184	0.72957	190.092	0.72957	196.80396	0.72957	204.37933	0.72957	209.75088	0.72957	217.12102	0.72957	222.5322	0.72957	228.32413	0.72957	234.64544	0.72957	237.85846	0.72957	243.26398
		0.73957	114.1959	0.73957	215.82873	0.73957	208.36377	0.73957	210.76433	0.73957	217.93631	0.73957	225.79901	0.73957	231.45223	0.73957	238.68365	0.73957	244.35386	0.73957	250.6426	0.73957	256.71054	0.73957	261.47346	0.73957	265.92923
		0.74957	126.52159	0.74957	242.97948	0.74957	230.64402	0.74957	233.65605	0.74957	241.42958	0.74957	249.24841	0.74957	255.68719	0.74957	263.36023	0.74957	269.1465	0.74957	274.52371	0.74957	281.07148	0.74957	287.26964	0.74957	291.30644
		0.75957	140.52456	0.75957	272.00283	0.75957	255.01486	0.75957	259.04317	0.75957	267.615	0.75957	276.37792	0.75957	282.80538	0.75957	290.61854	0.75957	296.58174	0.75957	302.8804	0.75957	308.1189	0.75957	315.89667	0.75957	319.72965
		0.76957	156.1104	0.76957	302.97381	0.76957	281.74098	0.76957	287.26964	0.76957	296.90163	0.76957	305.69285	0.76957	313.26822	0.76957	321.2753	0.76957	327.83581	0.76957	334.29866	0.76957	339.39278	0.76957	347.96037	0.76957	351.72116
		0.77957	173.09696	0.77957	335.66737	0.77957	310.8903	0.77957	318.4586	0.77957	329.41684	0.77957	339.25265	0.77957	347.27672	0.77957	355.58103	0.77957	362.41189	0.77957	368.47558	0.77957	376.12173	0.77957	383.91083	0.77957	387.59236
		0.78949	191.7523	0.78949	370.03397	0.78949	342.73885	0.78949	353.06016	0.78949	365.70842	0.78949	376.89172	0.78949	385.42675	0.78949	394.1741	0.78949	401.5598	0.78949	408.36943	0.78949	415.77212	0.78949	423.62633	0.78949	427.91083
		0.7995	211.90517	0.7995	406.00708	0.7995	377.58386	0.7995	391.43524	0.7995	406.21515	0.7995	418.03397	0.7995	428.21515	0.7995	437.37155	0.7995	445.18188	0.7995	452.67374	0.7995	459.63765	0.7995	467.26822	0.7995	473.23567
		0.80949	233.9264	0.80949	443.56122	0.80949	415.8627	0.80949	434.19108	0.80949	451.5966	0.80949	465.39561	0.80949	476.35103	0.80949	485.92074	0.80949	494.76716	0.80949	501.71691	0.80949	508.96391	0.80949	516.08068	0.80949	524.37367
		0.81949	257.46921	0.81949	482.64685	0.81949	457.94763	0.81949	481.83298	0.81949	502.4402	0.81949	517.93064	0.81949	530.59448	0.81949	541.19745	0.81949	550.25902	0.81949	558.35386	0.81949	565.08139	0.81949	571.50035	0.81949	581.96603
		0.82949	282.61571	0.82949	523.11536	0.82949	504.23638	0.82949	534.9356	0.82949	559.36872	0.82949	577.00212	0.82949	591.53149	0.82949	603.00495	0.82949	613.16207	0.82949	621.93206	0.82949	630.47275	0.82949	635.21444	0.82949	646.954
		0.8395	309.3673	0.8395	564.9724	0.8395	555.36023	0.8395	594.27035	0.8395	623.37863	0.8395	644.2845	0.8395	660.16985	0.8395	672.55485	0.8395	683.67304	0.8395	692.87615	0.8395	703.19038	0.8395	708.27035	0.8395	720.38924
		0.8495	337.36589	0.8495	608.28733	0.8495	611.98301	0.8495	660.74593	0.8495	695.35315	0.8495	718.65676	0.8495	737.57962	0.8495	751.43383	0.8495	763.69427	0.8495	773.97169	0.8495	784.14013	0.8495	791.20028	0.8495	803.1833
		0.8595	366.75584	0.8595	653.43383	0.8595	675.0828	0.8595	735.56263	0.8595	776.7983	0.8595	804.02689	0.8595	825.24416	0.8595	840.71196	0.8595	853.96886	0.8595	865.81175	0.8595	875.58669	0.8595	885.14791	0.8595	897.1465
		0.8695	397.06865	0.8695	700.43878	0.8695	745.19604	0.8695	819.50885	0.8695	868.40481	0.8695	900.13305	0.8695	924.19533	0.8695	941.45081	0.8695	956.30573	0.8695	968.68507	0.8695	978.66525	0.8695	990.71338	0.8695	1002.97523
		0.8795	428.33121	0.8795	749.71691	0.8795	823.15782	0.8795	913.86412	0.8795	971.50035	0.8795	1007.65039	0.8795	1035.79335	0.8795	1054.91437	0.8795	1071.36306	0.8795	1085.24558	0.8795	1097.25832	0.8795	1109.69002	0.8795	1122.18825
		0.8895	460.45435	0.8895	801.91507	0.8895	910.17693	0.8895	1020.02972	0.8895	1087.78769	0.8895	1130.18259	0.8895	1161.68719	0.8895	1183.30361	0.8895	1201.43524	0.8895	1216.71054	0.8895	1230.94975	0.8895	1243.96603	0.8895	1256.49682
		0.8995	493.10262	0.8995	857.72682	0.8995	1007.45364	0.8995	1139.47771	0.8995	1218.91295	0.8995	1267.12243	0.8995	1303.32059	0.8995	1327.59943	0.8995	1347.58528	0.8995	1364.22647	0.8995	1379.77636	0.8995	1395.05308	0.8995	1407.34466
		0.9095	526.65534	0.9095	918.72328	0.9095	1117.01769	0.9095	1274.69073	0.9095	1367.45789	0.9095	1422.49115	0.9095	1463.51026	0.9095	1490.27601	0.9095	1512.83793	0.9095	1531.05449	0.9095	1547.14791	0.9095	1564.65676	0.9095	1577.49469
		0.9195	560.65393	0.9195	985.63907	0.9195	1239.8443	0.9195	1426.7799	0.9195	1534.72045	0.9195	1598.07502	0.9195	1643.52442	0.9195	1673.8995	0.9195	1697.89101	0.9195	1718.55626	0.9195	1733.78627	0.9195	1753.02194	0.9195	1767.86978
		0.92942	595.20594	0.92942	1059.92781	0.92942	1377.431	0.92942	1597.80609	0.92942	1722.17976	0.92942	1793.02194	0.92942	1844.78415	0.92942	1878.48549	0.92942	1905.03892	0.92942	1927.615	0.92942	1944.31706	0.92942	1961.61359	0.92942	1980.32555
		0.93942	630.22788	0.93942	1143.28238	0.93942	1531.84713	0.93942	1789.93631	0.93942	1931.77636	0.93942	2012.25761	0.93942	2069.37013	0.93942	2106.14296	0.93942	2135.3574	0.93942	2159.53291	0.93942	2180.42463	0.93942	2193.19179	0.93942	2216.44728
		0.94942	665.30502	0.94942	1237.34749	0.94942	1704.71338	0.94942	2004.75584	0.94942	2166.19958	0.94942	2255.76787	0.94942	2318.40057	0.94942	2358.68365	0.94942	2391.11111	0.94942	2417.523	0.94942	2439.80184	0.94942	2451.21019	0.94942	2477.46638
		0.95942	700.79406	0.95942	1344.30432	0.95942	1898.61288	0.95942	2244.4586	0.95942	2426.36943	0.95942	2525.1097	0.95942	2594.30998	0.95942	2637.23992	0.95942	2673.67304	0.95942	2702.1373	0.95942	2724.76999	0.95942	2737.46638	0.95942	2765.27955
		0.96942	736.39774	0.96942	1466.29866	0.96942	2114.76292	0.96942	2510.47417	0.96942	2714.28167	0.96942	2823.76504	0.96942	2898.48549	0.96942	2944.1472	0.96942	2984.04812	0.96942	3013.26256	0.96942	3036.1925	0.96942	3053.23425	0.96942	3080.36801
		0.97942	772.34961	0.97942	1605.74664	0.97942	2355.3574	0.97942	2804.01982	0.97942	3030.81387	0.97942	3149.20028	0.97942	3231.74805	0.97942	3279.71691	0.97942	3323.55272	0.97942	3354.66384	0.97942	3377.57962	0.97942	3397.48054	0.97942	3423.87827
		0.98942	808.96108	0.98942	1765.43524	0.98942	2623.07148	0.98942	3128.2661	0.98942	3376.75867	0.98942	3506.76575	0.98942	3594.77707	0.98942	3646.68082	0.98942	3693.68719	0.98942	3726.14296	0.98942	3753.12102	0.98942	3771.16773	0.98942	3797.82024
		0.99942	846.33829	0.99942	1949.72399	0.99942	2920.46709	0.99942	3484.76999	0.99942	3755.96603	0.99942	3896.47558	0.99942	3989.82307	0.99942	4045.27955	0.99942	4095.17339	0.99942	4128.19533	0.99942	4158.74027	0.99942	4176.58882	0.99942	4202.37792
		1.00942	884.48832	1.00942	2161.79759	1.00942	3248.6058	1.00942	3873.46072	1.00942	4166.96391	1.00942	4315.44232	1.00942	4415.73956	1.00942	4474.45152	1.00942	4527.24699	1.00942	4560.86341	1.00942	4593.51734	1.00942	4613.41826	1.00942	4637.60793
		1.01942	923.40269	1.01942	2408.94551	1.01942	3608.7615	1.01942	4295.93772	1.01942	4610.44586	1.01942	4769.11536	1.01942	4873.61642	1.01942	4935.98018	1.01942	4989.32767	1.01942	5025.22293	1.01942	5058.81104	1.01942	5081.51451	1.01942	5103.52442
		1.02942	963.24133	1.02942	2701.84006	1.02942	4004.37367	1.02942	4750.91295	1.02942	5086.38358	1.02942	5253.24841	1.02942	5361.96745	1.02942	5427.89809	1.02942	5483.04317	1.02942	5517.65039	1.02942	5555.06016	1.02942	5578.00425	1.02942	5598.75442
		1.03942	1004.29582	1.03942	3059.19321	1.03942	4436.74452	1.03942	5241.69851	1.03942	5594.46568	1.03942	5770.50248	1.03942	5881.13234	1.03942	5950.67233	1.03942	6009.62491	1.03942	6043.35456	1.03942	6086.15711	1.03942	6101.54282	1.03942	6125.138
		1.04942	1046.50106	1.04942	3510.85633	1.04942	4907.31776	1.04942	5765.6334	1.04942	6134.0552	1.04942	6321.93914	1.04942	6438.8535	1.04942	6520.87757	1.04942	6587.30361	1.04942	6624.20382	1.04942	6670.06369	1.04942	6679.90092	1.04942	6712.37084
		1.05942	1090.06369	1.05942	4073.26256	1.05942	5416.70205	1.05942	6325.22293	1.05942	6746.76575	1.05942	6959.0092	1.05942	7078.74027	1.05942	7160.94834	1.05942	7230.8988	1.05942	7260.43878	1.05942	7304.7983	1.05942	7311.02619	1.05942	7347.13376
		1.06942	1152.45294	1.06942	4843.25548	1.06942	6088.32272	1.06942	7043.79335	1.06942	7425.03892	1.06942	7617.72116	1.06942	7714.98938	1.06942	7783.19887	1.06942	7843.93489	1.06942	7871.87544	1.06942	7904.76999	1.06942	7909.63907	1.06942	7943.34041
		1.07934	1207.5046	1.07934	5592.0736	1.07934	6748.16702	1.07934	7735.25832	1.07934	8078.03255	1.07934	8248.57749	1.07934	8323.04317	1.07934	8365.18047	1.07934	8403.72258	1.07934	8421.18896	1.07934	8434.80538	1.07934	8440.21231	1.07934	8461.25973
		1.08934	1233.46497	1.08934	6098.32979	1.08934	7227.36023	1.08934	8224.38783	1.08934	8527.34607	1.08934	8672.51238	1.08934	8729.21444	1.08934	8746.75159	1.08934	8764.1189	1.08934	8768.83227	1.08934	8776.90021	1.08934	8777.0276	1.08934	8786.31281
		1.09934	1212.29582	1.09934	6196.51805	1.09934	7372.62562	1.09934	8349.85138	1.09934	8613.10686	1.09934	8739.81599	1.09934	8802.17976	1.09934	8824.34536	1.09934	8839.8443	1.09934	8842.17976	1.09934	8854.63553	1.09934	8853.34749	1.09934	8864.71338
		1.08934	1132.56192	1.08934	5801.67021	1.08934	7066.07219	1.08934	7998.24487	1.08934	8337.93347	1.08934	8504.6426	1.08934	8595.15924	1.08934	8632.48408	1.08934	8658.04671	1.08934	8661.79759	1.08934	8681.1465	1.08934	8683.21302	1.08934	8698.79689
		1.07934	1041.07997	1.07934	5241.55697	1.07934	6605.138	1.07934	7479.10828	1.07934	7813.02194	1.07934	7986.32696	1.07934	8082.73178	1.07934	8142.06653	1.07934	8185.32201	1.07934	8194.29582	1.07934	8227.06299	1.07934	8235.01769	1.07934	8258.14579
		1.06942	945.41826	1.06942	4599.97169	1.06942	6045.49186	1.06942	6856.40481	1.06942	7187.07714	1.06942	7366.83652	1.06942	7467.30361	1.06942	7535.42817	1.06942	7584.78415	1.06942	7599.75938	1.06942	7632.17268	1.06942	7647.79901	1.06942	7669.56829
		1.05942	854.23638	1.05942	3964.18967	1.05942	5458.86766	1.05942	6205.22293	1.05942	6529.29936	1.05942	6709.92215	1.05942	6809.96461	1.05942	6882.80255	1.05942	6938.76858	1.05942	6957.21161	1.05942	6992.51238	1.05942	7010.37509	1.05942	7029.76645
		1.04942	773.58953	1.04942	3395.10262	1.04942	4901.44374	1.04942	5585.37863	1.04942	5888.84643	1.04942	6061.45789	1.04942	6156.17834	1.04942	6230.95541	1.04942	6286.72328	1.04942	6306.48266	1.04942	6345.22293	1.04942	6360.32555	1.04942	6380.76433
		1.03942	701.67587	1.03942	2895.01769	1.03942	4375.23001	1.03942	4999.30644	1.03942	5285.18047	1.03942	5447.1196	1.03942	5541.13234	1.03942	5614.32413	1.03942	5667.44515	1.03942	5690.4034	1.03942	5724.17551	1.03942	5737.79193	1.03942	5758.57042
		1.02942	638.1925	1.02942	2467.431	1.02942	3890.70064	1.02942	4457.19745	1.02942	4723.41118	1.02942	4875.11677	1.02942	4964.82661	1.02942	5035.48478	1.02942	5084.21798	1.02942	5111.64897	1.02942	5139.33475	1.02942	5151.47912	1.02942	5175.25832
		1.01942	582.04671	1.01942	2104.40198	1.01942	3445.53432	1.01942	3958.93843	1.01942	4204.75584	1.01942	4345.66171	1.01942	4430.54494	1.01942	4498.15994	1.01942	4542.43454	1.01942	4569.18613	1.01942	4593.77212	1.01942	4605.02477	1.01942	4631.21019
		1.00942	531.71691	1.00942	1796.61713	1.00942	3038.41472	1.00942	3501.42958	1.00942	3727.36023	1.00942	3856.8719	1.00942	3938.11748	1.00942	4002.87332	1.00942	4042.23638	1.00942	4071.33758	1.00942	4093.8712	1.00942	4102.60439	1.00942	4128.95966
		0.99942	486.49823	0.99942	1536.51805	0.99942	2669.05874	0.99942	3084.54352	0.99942	3290.84218	0.99942	3410.99788	0.99942	3486.05803	0.99942	3546.24204	0.99942	3583.07148	0.99942	3612.10191	0.99942	3633.98443	0.99942	3641.68436	0.99942	3666.49682
		0.98942	445.66454	0.98942	1316.7431	0.98942	2334.98938	0.98942	2705.64756	0.98942	2893.53149	0.98942	3003.14225	0.98942	3073.63057	0.98942	3128.40764	0.98942	3162.53362	0.98942	3188.66242	0.98942	3211.46497	0.98942	3220.60863	0.98942	3242.06653
		0.97942	408.49965	0.97942	1131.32484	0.97942	2036.06511	0.97942	2364.31706	0.97942	2533.8995	0.97942	2633.92781	0.97942	2698.69781	0.97942	2749.11536	0.97942	2780.72187	0.97942	2806.42604	0.97942	2826.18542	0.97942	2837.89101	0.97942	2856.15004
		0.96942	374.569	0.96942	974.77849	0.96942	1769.93631	0.96942	2058.82519	0.96942	2210.75725	0.96942	2302.19391	0.96942	2360.09908	0.96942	2405.9448	0.96942	2434.64968	0.96942	2459.74522	0.96942	2476.58882	0.96942	2491.16773	0.96942	2506.75159
		0.95942	343.4862	0.95942	842.82661	0.95942	1534.93277	0.95942	1787.40269	0.95942	1922.53362	0.95942	2003.60934	0.95942	2057.08422	0.95942	2097.93347	0.95942	2125.03892	0.95942	2147.0913	0.95942	2165.09554	0.95942	2179.47629	0.95942	2192.42746
		0.94942	315.08705	0.94942	731.65605	0.94942	1329.18047	0.94942	1548.4218	0.94942	1667.34607	0.94942	1740.08493	0.94942	1787.74239	0.94942	1824.52937	0.94942	1848.88889	0.94942	1870.60156	0.94942	1887.0913	0.94942	1901.1465	0.94942	1912.13022
		0.93942	289.23425	0.93942	637.8528	0.93942	1149.98018	0.93942	1339.18754	0.93942	1443.14225	0.93942	1507.0913	0.93942	1549.95046	0.93942	1583.28379	0.93942	1605.16631	0.93942	1625.09554	0.93942	1639.58953	0.93942	1653.03609	0.93942	1663.35456
		0.92942	265.46355	0.92942	558.37084	0.92942	994.38783	0.92942	1156.63553	0.92942	1246.82519	0.92942	1302.76292	0.92942	1340.90163	0.92942	1370.21939	0.92942	1390.10899	0.92942	1407.29653	0.92942	1420.80679	0.92942	1432.92286	0.92942	1443.53857
		0.9195	243.74947	0.9195	491.03892	0.9195	860.45435	0.9195	998.8535	0.9195	1076.67091	0.9195	1126.04954	0.9195	1158.9908	0.9195	1184.98655	0.9195	1202.88606	0.9195	1218.78273	0.9195	1229.4126	0.9195	1239.6971	0.9195	1251.44232
		0.9095	223.85704	0.9095	433.7707	0.9095	745.49186	0.9095	862.91437	0.9095	929.84713	0.9095	971.91507	0.9095	1001.3305	0.9095	1024.38924	0.9095	1039.94338	0.9095	1054.63977	0.9095	1064.96957	0.9095	1071.89526	0.9095	1084.18684
		0.8995	205.75655	0.8995	384.86483	0.8995	647.11536	0.8995	746.38924	0.8995	803.50602	0.8995	840.14013	0.8995	865.38995	0.8995	885.45081	0.8995	899.46072	0.8995	911.66737	0.8995	922.29582	0.8995	927.71408	0.8995	939.36023
		0.8895	189.13942	0.8895	342.88747	0.8895	562.95683	0.8895	646.65393	0.8895	695.23992	0.8895	726.54636	0.8895	748.51522	0.8895	765.85987	0.8895	778.11465	0.8895	789.7891	0.8895	798.34678	0.8895	804.12173	0.8895	814.21798
		0.8795	173.65464	0.8795	306.52654	0.8795	490.78698	0.8795	561.19038	0.8795	602.29299	0.8795	628.97665	0.8795	647.95046	0.8795	663.00495	0.8795	673.86412	0.8795	684.41189	0.8795	691.22718	0.8795	697.82449	0.8795	706.08493
		0.8695	159.38146	0.8695	274.88889	0.8695	429.0092	0.8695	488.11182	0.8695	522.75867	0.8695	546	0.8695	561.78485	0.8695	575.06582	0.8695	584.0552	0.8695	592.87049	0.8695	599.1012	0.8695	606.27035	0.8695	612.89597
		0.8595	146.20241	0.8595	247.19887	0.8595	375.98301	0.8595	425.54565	0.8595	454.71762	0.8595	473.87969	0.8595	487.89667	0.8595	499.27955	0.8595	507.1833	0.8595	515.45931	0.8595	521.42958	0.8595	527.49752	0.8595	532.72328
		0.8495	134.17282	0.8495	222.80821	0.8495	330.42887	0.8495	371.92781	0.8495	396.39349	0.8495	412.9356	0.8495	424.54777	0.8495	434.32272	0.8495	440.95966	0.8495	448.65534	0.8495	454.08209	0.8495	459.64473	0.8495	463.68153
		0.8395	123.10134	0.8395	201.17197	0.8395	291.10262	0.8395	325.83015	0.8395	346.27742	0.8395	360.29582	0.8395	370.09059	0.8395	378.58457	0.8395	384.21798	0.8395	390.16985	0.8395	395.15216	0.8395	401.15216	0.8395	404.18117
		0.82949	112.99151	0.82949	181.83581	0.82949	256.96957	0.82949	285.98018	0.82949	303.01203	0.82949	314.70205	0.82949	323.1196	0.82949	330.3765	0.82949	335.0644	0.82949	340.8903	0.82949	344.21798	0.82949	349.9816	0.82949	352.70771
		0.81949	103.63284	0.81949	164.44303	0.81949	227.24133	0.81949	251.48903	0.81949	265.63623	0.81949	275.96886	0.81949	282.53928	0.81949	288.84784	0.81949	292.78556	0.81949	298.00566	0.81949	300.10474	0.81949	304.7063	0.81949	308.12456
		0.80949	94.96008	0.80949	148.74593	0.80949	201.21585	0.80949	221.50177	0.80949	233.17339	0.80949	241.36872	0.80949	247.32626	0.80949	252.74168	0.80949	255.97877	0.80949	259.85987	0.80949	263.37155	0.80949	264.83086	0.80949	269.40835
		0.7995	87.00142	0.7995	134.50984	0.7995	178.3765	0.7995	195.30644	0.7995	204.90729	0.7995	212.14437	0.7995	216.75018	0.7995	221.61925	0.7995	224.20241	0.7995	227.99151	0.7995	230.98372	0.7995	230.30998	0.7995	235.70701
		0.78949	79.47941	0.78949	121.5087	0.78949	158.16561	0.78949	172.2845	0.78949	180.10333	0.78949	186.34112	0.78949	189.95046	0.78949	194.04812	0.78949	196.14579	0.78949	199.73956	0.78949	201.49894	0.78949	201.03609	0.78949	206.14862
		0.77957	72.63539	0.77957	109.62803	0.77957	140.27544	0.77957	151.99575	0.77957	158.30432	0.77957	163.30078	0.77957	166.46568	0.77957	169.80467	0.77957	171.90092	0.77957	174.04529	0.77957	175.83723	0.77957	176.41755	0.77957	180.26469
		0.76957	66.33178	0.76957	98.75216	0.76957	124.36023	0.76957	134.05421	0.76957	139.09936	0.76957	143.75655	0.76957	145.77495	0.76957	148.83793	0.76957	150.25478	0.76957	152.74735	0.76957	153.02052	0.76957	155.12102	0.76957	157.47629
		0.75957	60.44091	0.75957	88.79575	0.75957	110.15867	0.75957	118.14055	0.75957	122.08946	0.75957	125.57509	0.75957	127.47247	0.75957	130.10672	0.75957	131.49894	0.75957	133.50474	0.75957	134.35442	0.75957	136.03949	0.75957	137.31791
		0.74957	55.11012	0.74957	79.65534	0.74957	97.47091	0.74957	103.95386	0.74957	106.9983	0.74957	110.15952	0.74957	111.2426	0.74957	113.62619	0.74957	114.5523	0.74957	115.55796	0.74957	117.63369	0.74957	118.75301	0.74957	119.42675
		0.73957	50.17608	0.73957	71.24586	0.73957	86.07233	0.73957	91.28294	0.73957	93.54975	0.73957	96.42095	0.73957	96.77495	0.73957	98.8586	0.73957	99.71069	0.73957	100.88309	0.73957	101.43949	0.73957	103.27997	0.73957	103.44742
		0.72957	45.54268	0.72957	63.50432	0.72957	75.84331	0.72957	79.96787	0.72957	81.56065	0.72957	83.4477	0.72957	83.84869	0.72957	85.81741	0.72957	86.1966	0.72957	87.37155	0.72957	87.25166	0.72957	89.42845	0.72957	89.16461
		0.71957	41.36999	0.71957	56.40807	0.71957	66.64685	0.71957	69.82817	0.71957	70.84091	0.71957	72.77311	0.71957	72.29356	0.71957	73.96065	0.71957	74.3816	0.71957	74.44671	0.71957	74.2862	0.71957	76.88549	0.71957	76.3414
		0.70957	37.60071	0.70957	49.91706	0.70957	58.36914	0.70957	60.74055	0.70957	61.27884	0.70957	62.52781	0.70957	61.96249	0.70957	63.28606	0.70957	63.55216	0.70957	64.15527	0.70957	64.04855	0.70957	64.87544	0.70957	64.91295
		0.69957	34.31578	0.69957	43.95626	0.69957	50.92003	0.69957	52.55683	0.69957	52.70786	0.69957	53.68592	0.69957	52.67063	0.69957	54.12923	0.69957	54.11281	0.69957	54.46808	0.69957	54.91224	0.69957	53.33022	0.69957	54.58344
		0.68957	31.32399	0.68957	38.51861	0.68957	44.231	0.68957	45.24048	0.68957	45.06384	0.68957	46.12909	0.68957	44.38089	0.68957	45.64841	0.68957	45.41146	0.68957	44.9632	0.68957	45.36546	0.68957	42.85591	0.68957	45.37849
		0.67957	28.50573	0.67957	33.5707	0.67957	38.26539	0.67957	38.71451	0.67957	38.26355	0.67957	38.33786	0.67957	36.97834	0.67957	38.09724	0.67957	37.92484	0.67957	37.69243	0.67957	36.99193	0.67957	33.99038	0.67957	37.1472
		0.66957	25.82293	0.66957	29.11621	0.66957	32.95655	0.66957	32.9012	0.66957	32.19958	0.66957	32.45945	0.66957	30.40057	0.66957	31.39292	0.66957	31.01953	0.66957	30.75272	0.66957	29.17297	0.66957	27.23326	0.66957	29.73744
		0.65957	23.37339	0.65957	25.12328	0.65957	28.23595	0.65957	27.74381	0.65957	26.83355	0.65957	26.75272	0.65957	24.59604	0.65957	25.48323	0.65957	25.11989	0.65957	23.90234	0.65957	23.48238	0.65957	21.92711	0.65957	23.16447
		0.64957	21.27162	0.64957	21.53942	0.64957	24.05039	0.64957	23.16603	0.64957	22.09314	0.64957	21.63482	0.64957	19.41996	0.64957	20.24303	0.64957	19.66086	0.64957	18.90771	0.64957	18.79774	0.64957	17.42151	0.64957	17.27757
		0.63965	19.44062	0.63965	18.37863	0.63965	20.35117	0.63965	19.14239	0.63965	17.92739	0.63965	17.75272	0.63965	14.85931	0.63965	15.47926	0.63965	15.0695	0.63965	14.11482	0.63965	13.32525	0.63965	12.96964	0.63965	12.02794
		0.62965	17.90587	0.62965	15.61019	0.62965	17.09186	0.62965	15.62534	0.62965	14.26483	0.62965	13.26815	0.62965	10.83035	0.62965	11.6525	0.62965	10.81967	0.62965	9.28937	0.62965	8.54348	0.62965	8.80535	0.62965	7.48904
		0.61965	16.48592	0.61965	13.21335	0.61965	14.22067	0.61965	12.55319	0.61965	11.05783	0.61965	10.29694	0.61965	7.30335	0.61965	7.94634	0.61965	7.32377	0.61965	5.88117	0.61965	3.94838	0.61965	5.04593	0.61965	3.44125
		0.60965	15.06638	0.60965	11.12899	0.60965	11.70136	0.60965	9.86238	0.60965	8.21163	0.60965	7.42238	0.60965	4.21898	0.60965	4.57983	0.60965	4.00447	0.60965	2.6204	0.60965	0.90357	0.60965	1.7596	0.60965	-0.14568
		0.59965	13.76183	0.59965	9.33635	0.59965	9.46624	0.59965	7.4967	0.59965	5.69543	0.59965	4.4693	0.59965	1.4908	0.59965	1.90887	0.59965	1.29227	0.59965	-0.84657	0.59965	-0.9852	0.59965	-1.6306	0.59965	-3.36545
		0.58965	12.47594	0.58965	7.82098	0.58965	7.50122	0.58965	5.40512	0.58965	3.49725	0.58965	2.63071	0.58965	-0.86885	0.58965	-0.60485	0.58965	-1.40448	0.58965	-3.16576	0.58965	-4.1182	0.58965	-5.69581	0.58965	-6.28347
		0.57965	11.28814	0.57965	6.55033	0.57965	5.76979	0.57965	3.57357	0.57965	1.55507	0.57965	0.11734	0.57965	-2.97918	0.57965	-2.76951	0.57965	-3.58869	0.57965	-5.43796	0.57965	-7.0864	0.57965	-9.86824	0.57965	-8.8712
		0.56965	10.26194	0.56965	5.4662	0.56965	4.24594	0.56965	1.96324	0.56965	-0.13997	0.56965	-1.45179	0.56965	-4.8585	0.56965	-4.85916	0.56965	-5.78488	0.56965	-8.01662	0.56965	-9.97122	0.56965	-13.48657	0.56965	-11.24788
		0.55965	9.26613	0.55965	4.52357	0.55965	2.91015	0.55965	0.52821	0.55965	-1.68954	0.55965	-2.85257	0.55965	-6.57144	0.55965	-6.5503	0.55965	-7.55598	0.55965	-9.69326	0.55965	-11.82961	0.55965	-15.73093	0.55965	-13.4089
		0.54965	8.48134	0.54965	3.72981	0.54965	1.71864	0.54965	-0.74066	0.54965	-3.09846	0.54965	-4.92314	0.54965	-8.12931	0.54965	-8.35345	0.54965	-9.35114	0.54965	-11.40286	0.54965	-12.29175	0.54965	-16.67346	0.54965	-15.41741
		0.53965	7.75189	0.53965	3.04954	0.53965	0.65525	0.53965	-1.89989	0.53965	-4.39571	0.53965	-5.83052	0.53965	-9.53161	0.53965	-10.08045	0.53965	-10.81513	0.53965	-13.39683	0.53965	-14.28691	0.53965	-17.12413	0.53965	-17.28917
		0.52965	6.9968	0.52965	2.47274	0.52965	-0.3131	0.52965	-2.96409	0.52965	-5.58957	0.52965	-7.35386	0.52965	-10.81213	0.52965	-11.18555	0.52965	-12.36358	0.52965	-14.76122	0.52965	-16.57438	0.52965	-17.785	0.52965	-18.97806
		0.51965	6.35735	0.51965	1.92989	0.51965	-1.20709	0.51965	-3.96333	0.51965	-6.73019	0.51965	-8.47955	0.51965	-12.00393	0.51965	-12.53217	0.51965	-13.64745	0.51965	-16.10248	0.51965	-18.76886	0.51965	-18.88422	0.51965	-20.54437
		0.50965	5.79781	0.50965	1.42889	0.50965	-2.05605	0.50965	-4.90386	0.50965	-7.79962	0.50965	-9.11966	0.50965	-13.13308	0.50965	-13.75732	0.50965	-15.04204	0.50965	-17.70786	0.50965	-20.24827	0.50965	-20.11536	0.50965	-21.93843
		0.49973	5.31372	0.49973	0.98258	0.49973	-2.86212	0.49973	-5.80377	0.49973	-8.81134	0.49973	-10.88361	0.49973	-14.22718	0.49973	-14.93376	0.49973	-16.17721	0.49973	-18.93999	0.49973	-20.13829	0.49973	-21.26185	0.49973	-23.2586
		0.48973	4.8847	0.48973	0.57332	0.48973	-3.64183	0.48973	-6.67639	0.48973	-9.78971	0.48973	-11.43488	0.48973	-15.28931	0.48973	-16.03015	0.48973	-17.43751	0.48973	-19.98542	0.48973	-21.58089	0.48973	-22.44614	0.48973	-24.53843
		0.47973	4.30326	0.47973	0.20157	0.47973	-4.41363	0.47973	-7.55127	0.47973	-10.72215	0.47973	-12.50829	0.47973	-16.32838	0.47973	-17.41175	0.47973	-18.55173	0.47973	-21.37141	0.47973	-23.56178	0.47973	-24.35556	0.47973	-25.81628
		0.46973	3.69277	0.46973	-0.19626	0.46973	-5.16953	0.46973	-8.40742	0.46973	-11.65725	0.46973	-13.71909	0.46973	-17.36561	0.46973	-18.29214	0.46973	-19.8426	0.46973	-22.60269	0.46973	-25.42732	0.46973	-27.05237	0.46973	-27.10163
		0.45973	3.04624	0.45973	-0.59863	0.45973	-5.91244	0.45973	-9.26219	0.45973	-12.57999	0.45973	-14.20453	0.45973	-18.34919	0.45973	-18.72272	0.45973	-20.92682	0.45973	-23.56093	0.45973	-26.80368	0.45973	-29.92286	0.45973	-28.4051
		0.44973	2.37214	0.44973	-0.99207	0.44973	-6.65038	0.44973	-10.08981	0.44973	-13.48766	0.44973	-15.82208	0.44973	-19.32045	0.44973	-19.5581	0.44973	-22.15527	0.44973	-24.85506	0.44973	-26.52243	0.44973	-32.10828	0.44973	-29.72739
		0.43973	1.69761	0.43973	-1.362	0.43973	-7.37625	0.43973	-10.9168	0.43973	-14.4017	0.43973	-16.37919	0.43973	-20.23524	0.43973	-20.52739	0.43973	-23.18089	0.43973	-26.10248	0.43973	-27.64289	0.43973	-32.9414	0.43973	-31.00255
		0.42973	0.95742	0.42973	-1.70209	0.42973	-8.0924	0.42973	-11.75121	0.42973	-15.29837	0.42973	-17.20538	0.42973	-21.12045	0.42973	-22.11975	0.42973	-24.34636	0.42973	-26.98174	0.42973	-29.57565	0.42973	-32.9373	0.42973	-32.26582
		0.41973	0.24432	0.41973	-2.00488	0.41973	-8.80249	0.41973	-12.5673	0.41973	-16.17693	0.41973	-18.59151	0.41973	-22.03326	0.41973	-23.32923	0.41973	-25.36943	0.41973	-28.20708	0.41973	-31.34805	0.41973	-32.85548	0.41973	-33.46936
		0.40973	-0.29575	0.40973	-2.27663	0.40973	-9.48061	0.40973	-13.39012	0.40973	-17.0351	0.40973	-19.061	0.40973	-22.89413	0.40973	-24.81033	0.40973	-26.48917	0.40973	-29.55357	0.40973	-32.80156	0.40973	-33.30432	0.40973	-34.66086
		0.39973	-0.73922	0.39973	-2.51178	0.39973	-10.14109	0.39973	-14.185	0.39973	-17.83043	0.39973	-20.43142	0.39973	-23.77636	0.39973	-25.58018	0.39973	-27.49299	0.39973	-30.37268	0.39973	-32.51975	0.39973	-34.1431	0.39973	-35.87771
		0.38973	-1.02395	0.38973	-2.67953	0.38973	-10.78351	0.38973	-14.96377	0.38973	-18.59462	0.38973	-21.12229	0.38973	-24.61755	0.38973	-25.96079	0.38973	-28.56136	0.38973	-31.51069	0.38973	-33.30616	0.38973	-35.02166	0.38973	-37.07643
		0.37973	-1.29106	0.37973	-2.78829	0.37973	-11.39778	0.37973	-15.71635	0.37973	-19.3264	0.37973	-21.65973	0.37973	-25.42321	0.37973	-26.70899	0.37973	-29.56037	0.37973	-32.90234	0.37973	-35.18882	0.37973	-35.89498	0.37973	-38.26907
		0.36973	-1.49038	0.36973	-2.82371	0.36973	-11.96568	0.36973	-16.42548	0.36973	-19.99604	0.36973	-23.17254	0.36973	-26.24501	0.36973	-27.56164	0.36973	-30.56674	0.36973	-33.55895	0.36973	-36.81005	0.36973	-37.07063	0.36973	-39.43977
		0.35973	-1.59992	0.35973	-2.79677	0.35973	-12.48198	0.35973	-17.07488	0.35973	-20.64161	0.35973	-23.51139	0.35973	-26.98132	0.35973	-28.99165	0.35973	-31.54098	0.35973	-34.62604	0.35973	-38.39915	0.35973	-39.1758	0.35973	-40.57268
		0.34981	-1.76343	0.34981	-2.74542	0.34981	-12.93565	0.34981	-17.6528	0.34981	-21.21996	0.34981	-24.49299	0.34981	-27.69087	0.34981	-30.04487	0.34981	-32.46978	0.34981	-35.99802	0.34981	-38.16957	0.34981	-41.74338	0.34981	-41.6586
		0.33981	-1.96572	0.33981	-2.67877	0.33981	-13.34296	0.33981	-18.18273	0.33981	-21.74536	0.33981	-25.2385	0.33981	-28.35456	0.33981	-31.35414	0.33981	-33.3908	0.33981	-36.43071	0.33981	-38.57636	0.33981	-44.14183	0.33981	-42.72456
		0.32981	-2.20151	0.32981	-2.6073	0.32981	-13.71063	0.32981	-18.67091	0.32981	-22.22633	0.32981	-25.41047	0.32981	-28.95824	0.32981	-31.84628	0.32981	-34.22972	0.32981	-37.4167	0.32981	-40.06709	0.32981	-45.62647	0.32981	-43.75612
		0.31981	-2.29074	0.31981	-2.54245	0.31981	-14.01333	0.31981	-19.0954	0.31981	-22.59958	0.31981	-26.73942	0.31981	-29.52498	0.31981	-32.09752	0.31981	-35.08719	0.31981	-38.69342	0.31981	-41.65435	0.31981	-45.83383	0.31981	-44.75287
		0.30981	-2.3488	0.30981	-2.4694	0.30981	-14.2845	0.30981	-19.46171	0.30981	-22.90616	0.30981	-26.83638	0.30981	-30.04218	0.30981	-32.69342	0.30981	-35.79816	0.30981	-38.95966	0.30981	-43.14664	0.30981	-45.43977	0.30981	-45.7097
		0.29981	-2.43469	0.29981	-2.3832	0.29981	-14.51479	0.29981	-19.7482	0.29981	-23.16433	0.29981	-27.32442	0.29981	-30.48309	0.29981	-32.78754	0.29981	-36.50941	0.29981	-40.07473	0.29981	-43.4351	0.29981	-45.13914	0.29981	-46.54692
		0.2898	-2.40764	0.2898	-2.29309	0.2898	-14.70602	0.2898	-19.97113	0.2898	-23.38386	0.2898	-28.015	0.2898	-30.89342	0.2898	-33.46369	0.2898	-37.07686	0.2898	-40.63963	0.2898	-43.80694	0.2898	-45.28606	0.2898	-47.33008
		0.27981	-2.23592	0.27981	-2.20869	0.27981	-14.88252	0.27981	-20.15527	0.27981	-23.58061	0.27981	-27.88762	0.27981	-31.24105	0.27981	-33.862	0.27981	-37.63326	0.27981	-40.19632	0.27981	-44.70757	0.27981	-45.62576	0.27981	-47.9959
		0.26981	-2.13563	0.26981	-2.15793	0.26981	-15.02689	0.26981	-20.28393	0.26981	-23.71536	0.26981	-28.79731	0.26981	-31.53701	0.26981	-34.40538	0.26981	-38.09101	0.26981	-40.67601	0.26981	-46.02335	0.26981	-45.98684	0.26981	-48.63071
		0.25981	-1.91305	0.25981	-2.14033	0.25981	-15.1305	0.25981	-20.38259	0.25981	-23.82604	0.25981	-28.71621	0.25981	-31.78938	0.25981	-35.51706	0.25981	-38.63029	0.25981	-40.82987	0.25981	-46.79604	0.25981	-46.31861	0.25981	-49.27275
		0.24981	-1.92086	0.24981	-2.12662	0.24981	-15.20736	0.24981	-20.44529	0.24981	-23.88365	0.24981	-28.73673	0.24981	-31.9598	0.24981	-36.03383	0.24981	-39.07332	0.24981	-41.08946	0.24981	-46.51507	0.24981	-47.26752	0.24981	-49.83808
		0.2398	-2.0232	0.2398	-2.11364	0.2398	-15.28577	0.2398	-20.50078	0.2398	-23.93178	0.2398	-29.4184	0.2398	-32.11125	0.2398	-36.83397	0.2398	-39.56617	0.2398	-41.57877	0.2398	-46.07063	0.2398	-49.16872	0.2398	-50.4051
		0.22981	-2.02947	0.22981	-2.09607	0.22981	-15.3431	0.22981	-20.53588	0.22981	-23.95386	0.22981	-29.09342	0.22981	-32.2058	0.22981	-36.84246	0.22981	-39.92753	0.22981	-41.80453	0.22981	-46.54268	0.22981	-51.33687	0.22981	-50.96164
		0.21981	-2.2413	0.21981	-2.07331	0.21981	-15.4017	0.21981	-20.5482	0.21981	-23.95088	0.21981	-29.59887	0.21981	-32.30899	0.21981	-36.44501	0.21981	-40.41132	0.21981	-42.1121	0.21981	-47.21939	0.21981	-52.92555	0.21981	-51.47261
		0.20988	-2.29737	0.20988	-2.06548	0.20988	-15.43977	0.20988	-20.54862	0.20988	-23.98231	0.20988	-29.57282	0.20988	-32.39802	0.20988	-36.43935	0.20988	-40.67233	0.20988	-42.47771	0.20988	-48.17693	0.20988	-53.25265	0.20988	-52.01783
		0.19988	-2.33731	0.19988	-2.05377	0.19988	-15.45874	0.19988	-20.55188	0.19988	-24.01656	0.19988	-29.31125	0.19988	-32.4753	0.19988	-36.55994	0.19988	-41.20991	0.19988	-42.72909	0.19988	-47.85393	0.19988	-52.45916	0.19988	-52.52427
		0.18988	-2.36839	0.18988	-2.0479	0.18988	-15.49894	0.18988	-20.55556	0.18988	-24.08379	0.18988	-30.12243	0.18988	-32.55541	0.18988	-37.30842	0.18988	-41.43864	0.18988	-43.01175	0.18988	-47.08125	0.18988	-51.48153	0.18988	-52.93602
		0.17988	-2.36654	0.17988	-2.06163	0.17988	-15.53503	0.17988	-20.56971	0.17988	-24.17028	0.17988	-29.76207	0.17988	-32.60594	0.17988	-37.68875	0.17988	-41.91026	0.17988	-43.30248	0.17988	-47.87955	0.17988	-50.92173	0.17988	-53.39731
		0.16988	-2.36868	0.16988	-2.09101	0.16988	-15.57311	0.16988	-20.5942	0.16988	-24.2603	0.16988	-30.02095	0.16988	-32.66794	0.16988	-38.36745	0.16988	-42.13376	0.16988	-43.51493	0.16988	-48.63836	0.16988	-50.86638	0.16988	-53.83808
		0.15988	-2.36712	0.15988	-2.13393	0.15988	-15.63128	0.15988	-20.62534	0.15988	-24.38896	0.15988	-30.22449	0.15988	-32.75046	0.15988	-38.25959	0.15988	-42.46412	0.15988	-43.75768	0.15988	-49.71762	0.15988	-50.91847	0.15988	-54.32512
		0.14988	-2.36418	0.14988	-2.16139	0.14988	-15.69214	0.14988	-20.69512	0.14988	-24.5465	0.14988	-29.88535	0.14988	-32.87035	0.14988	-37.96971	0.14988	-42.62774	0.14988	-44.01486	0.14988	-49.74494	0.14988	-51.05322	0.14988	-54.82944
		0.13988	-2.36352	0.13988	-2.17355	0.13988	-15.75145	0.13988	-20.78018	0.13988	-24.75895	0.13988	-30.74027	0.13988	-33.01132	0.13988	-37.88677	0.13988	-43.02194	0.13988	-44.26214	0.13988	-48.72512	0.13988	-51.39958	0.13988	-55.31238
		0.12988	-2.30123	0.12988	-2.19643	0.12988	-15.82208	0.12988	-20.87884	0.12988	-25.00948	0.12988	-30.45732	0.12988	-33.15796	0.12988	-37.97778	0.12988	-43.2058	0.12988	-44.54904	0.12988	-49.38684	0.12988	-52.5431	0.12988	-55.79462
		0.11988	-2.32742	0.11988	-2.22265	0.11988	-15.90078	0.11988	-20.99066	0.11988	-25.29115	0.11988	-30.58415	0.11988	-33.3196	0.11988	-38.67431	0.11988	-43.66157	0.11988	-44.85039	0.11988	-50.29965	0.11988	-54.38287	0.11988	-56.28054
		0.10988	-2.43721	0.10988	-2.26184	0.10988	-15.98726	0.10988	-21.10502	0.10988	-25.58981	0.10988	-31.08167	0.10988	-33.50488	0.10988	-39.13531	0.10988	-43.83355	0.10988	-45.1431	0.10988	-51.3472	0.10988	-56.20863	0.10988	-56.81047
		0.09988	-2.62134	0.09988	-2.30229	0.09988	-16.07318	0.09988	-21.24728	0.09988	-25.8862	0.09988	-30.81019	0.09988	-33.70177	0.09988	-39.70856	0.09988	-44.33008	0.09988	-45.52399	0.09988	-51.69526	0.09988	-57.38712	0.09988	-57.31791
		0.08988	-2.86256	0.08988	-2.34301	0.08988	-16.15272	0.08988	-21.40906	0.08988	-26.19023	0.08988	-31.5966	0.08988	-33.92569	0.08988	-40.08733	0.08988	-44.56008	0.08988	-45.8518	0.08988	-51.01146	0.08988	-57.25548	0.08988	-57.88408
		0.07988	-2.95432	0.07988	-2.40171	0.07988	-16.23765	0.07988	-21.57141	0.07988	-26.50248	0.07988	-31.50856	0.07988	-34.18061	0.07988	-40.42873	0.07988	-45.08563	0.07988	-46.19858	0.07988	-50.96546	0.07988	-56.41486	0.07988	-58.42335
		0.06996	-3.01766	0.06996	-2.4697	0.06996	-16.32017	0.06996	-21.76603	0.06996	-26.83468	0.06996	-31.53319	0.06996	-34.46553	0.06996	-41.03114	0.06996	-45.35202	0.06996	-46.631	0.06996	-51.4753	0.06996	-55.55117	0.06996	-58.94961
		0.05996	-3.04585	0.05996	-2.53871	0.05996	-16.40849	0.05996	-21.96815	0.05996	-27.19434	0.05996	-32.36037	0.05996	-34.79816	0.05996	-40.98217	0.05996	-45.84091	0.05996	-46.97452	0.05996	-52.02477	0.05996	-55.28096	0.05996	-59.51975
		0.04996	-3.04677	0.04996	-2.59305	0.04996	-16.49257	0.04996	-22.18429	0.04996	-27.54989	0.04996	-32.15131	0.04996	-35.14593	0.04996	-40.61925	0.04996	-46.10814	0.04996	-47.43638	0.04996	-52.17636	0.04996	-55.35725	0.04996	-60.08648
		0.03996	-2.98587	0.03996	-2.63138	0.03996	-16.58585	0.03996	-22.41953	0.03996	-27.90984	0.03996	-32.76815	0.03996	-35.52442	0.03996	-40.69667	0.03996	-46.58542	0.03996	-47.96815	0.03996	-52.16929	0.03996	-55.55541	0.03996	-60.69696
		0.02996	-3.00865	0.02996	-2.65687	0.02996	-16.69625	0.02996	-22.65789	0.02996	-28.2695	0.02996	-32.96405	0.02996	-35.90941	0.02996	-40.96221	0.02996	-46.76391	0.02996	-48.3833	0.02996	-52.84841	0.02996	-55.73121	0.02996	-61.27997
		0.01996	-3.11515	0.01996	-2.69145	0.01996	-16.83312	0.01996	-22.91139	0.01996	-28.63751	0.01996	-32.83935	0.01996	-36.31097	0.01996	-41.88507	0.01996	-47.26157	0.01996	-48.90219	0.01996	-54.26653	0.01996	-56.47799	0.01996	-61.8954
		0.00996	-3.29788	0.00996	-2.73745	0.00996	-16.99674	0.00996	-23.17282	0.00996	-29.03666	0.00996	-33.92059	0.00996	-36.74409	0.00996	-42.49979	0.00996	-47.44133	0.00996	-49.51748	0.00996	-55.58797	0.00996	-58.25577	0.00996	-62.62194
		-3.91006E-5	-3.53788	-3.91006E-5	-2.79856	-3.91006E-5	-17.19717	-3.91006E-5	-23.44869	-3.91006E-5	-29.42251	-3.91006E-5	-33.78117	-3.91006E-5	-37.15966	-3.91006E-5	-43.39731	-3.91006E-5	-48.01628	-3.91006E-5	-49.96334	-3.91006E-5	-56.31097	-3.91006E-5	-60.45832	-3.91006E-5	-63.34409
		-0.01004	-3.62921	-0.01004	-2.87414	-0.01004	-17.41132	-0.01004	-23.73942	-0.01004	-29.81925	-0.01004	-34.27445	-0.01004	-37.58669	-0.01004	-43.55343	-0.01004	-48.2075	-0.01004	-50.55315	-0.01004	-55.4034	-0.01004	-62.3925	-0.01004	-64.11691
		-0.02004	-3.69248	-0.02004	-2.96606	-0.02004	-17.64699	-0.02004	-24.05662	-0.02004	-30.20892	-0.02004	-34.81585	-0.02004	-38.01925	-0.02004	-43.45662	-0.02004	-48.7908	-0.02004	-51.21883	-0.02004	-55.77353	-0.02004	-63.138	-0.02004	-64.92413
		-0.03004	-3.72062	-0.03004	-3.05534	-0.03004	-17.9196	-0.03004	-24.4	-0.03004	-30.62576	-0.03004	-34.72413	-0.03004	-38.47657	-0.03004	-43.82406	-0.03004	-49.03708	-0.03004	-51.66129	-0.03004	-57.10219	-0.03004	-62.77806	-0.03004	-65.80071
		-0.04004	-3.7216	-0.04004	-3.12173	-0.04004	-18.2201	-0.04004	-24.75315	-0.04004	-31.03779	-0.04004	-35.87544	-0.04004	-38.97537	-0.04004	-43.87983	-0.04004	-49.65081	-0.04004	-52.30318	-0.04004	-58.28195	-0.04004	-62.05449	-0.04004	-66.73263
		-0.05004	-3.72211	-0.05004	-3.17761	-0.05004	-18.57976	-0.05004	-25.12116	-0.05004	-31.44388	-0.05004	-35.88493	-0.05004	-39.49667	-0.05004	-44.58471	-0.05004	-49.96136	-0.05004	-53.03312	-0.05004	-59.28662	-0.05004	-61.64572	-0.05004	-67.65803
		-0.06004	-3.71834	-0.06004	-3.22406	-0.06004	-18.96008	-0.06004	-25.50446	-0.06004	-31.84388	-0.06004	-36.0218	-0.06004	-40.06256	-0.06004	-45.46044	-0.06004	-51.30941	-0.06004	-53.70602	-0.06004	-58.91522	-0.06004	-61.80991	-0.06004	-68.57636
		-0.06996	-3.71506	-0.06996	-3.28262	-0.06996	-19.35145	-0.06996	-25.92385	-0.06996	-32.27063	-0.06996	-37.09073	-0.06996	-40.69342	-0.06996	-46.03213	-0.06996	-50.73079	-0.06996	-54.38769	-0.06996	-58.75683	-0.06996	-62.22958	-0.06996	-69.45011
		-0.07996	-3.71398	-0.07996	-3.34497	-0.07996	-19.75173	-0.07996	-26.40665	-0.07996	-32.75428	-0.07996	-37.67417	-0.07996	-41.37834	-0.07996	-46.34069	-0.07996	-51.04006	-0.07996	-54.82364	-0.07996	-59.43992	-0.07996	-62.82887	-0.07996	-70.35414
		-0.08996	-3.7121	-0.08996	-3.40839	-0.08996	-20.14664	-0.08996	-26.89597	-0.08996	-33.2402	-0.08996	-38.9097	-0.08996	-42.08181	-0.08996	-46.40142	-0.08996	-50.45096	-0.08996	-55.17537	-0.08996	-59.83241	-0.08996	-63.477	-0.08996	-71.23878
		-0.08996	-3.7121
