# Supplementary material for: The methanol electrooxidation activity and the CO-resilient surface of a La x Fe 1− y − z Cu y Pd z O 3 perovskite
Source: Royal Society of Chemistry journal article supplement (doi:10.1039/d5ta04846j), 2026-01-01
Supplement: d5ta04846j8.xlsx [file d5ta04846j8.xlsx]

## Sheet: Feuil1
		SR	600 mV/s
		E	j	E	j	E	j	E	j	E	j	E	j
		V	µA/cm^2	V	µA/cm^2	V	µA/cm^2	V	µA/cm^2	V	µA/cm^2	V	µA/cm^2
	c MeOH	0.1M	0.1M	0.2M	0.2M	0.5M	0.5M	1.0M	1.0M	1.5M	1.5M	2.0M	2.0M
		-0.09996	2.05853	-0.09996	-2.12603	-0.09996	1.65357	-0.09996	0.03375	-0.09996	-2.32851	-0.09996	0.64118
		-0.08996	6.88442	-0.08996	1.563	-0.08996	6.70678	-0.08996	4.46783	-0.08996	2.06437	-0.08996	4.85933
		-0.07996	10.61438	-0.07996	4.66981	-0.07996	10.79018	-0.07996	8.12876	-0.07996	5.70446	-0.07996	8.42067
		-0.06996	13.1357	-0.06996	6.91706	-0.06996	13.62239	-0.06996	10.71939	-0.06996	8.30856	-0.06996	10.92672
		-0.06004	15.16249	-0.06004	8.83948	-0.06004	15.75782	-0.06004	12.78137	-0.06004	10.38222	-0.06004	12.94696
		-0.05004	16.74466	-0.05004	10.31592	-0.05004	17.40326	-0.05004	14.31139	-0.05004	12.04035	-0.05004	14.43284
		-0.04004	18.22873	-0.04004	11.66713	-0.04004	18.78386	-0.04004	15.51451	-0.04004	13.40788	-0.04004	15.58783
		-0.03004	19.69639	-0.03004	13.03912	-0.03004	20.00778	-0.03004	16.51677	-0.03004	14.6351	-0.03004	16.62746
		-0.02004	21.15655	-0.02004	14.33333	-0.02004	21.21302	-0.02004	17.39646	-0.02004	15.71989	-0.02004	17.52668
		-0.01004	22.78344	-0.01004	15.74933	-0.01004	22.37481	-0.01004	18.23057	-0.01004	16.76164	-0.01004	18.41062
		-3.91006E-5	24.4879	-3.91006E-5	17.13531	-3.91006E-5	23.48861	-3.91006E-5	18.97976	-3.91006E-5	17.80552	-3.91006E-5	19.22236
		0.00996	26.27148	0.00996	18.58995	0.00996	24.63708	0.00996	19.70262	0.00996	18.81217	0.00996	20.01953
		0.01996	28.16037	0.01996	20.11097	0.01996	25.78797	0.01996	20.41359	0.01996	19.82689	0.01996	20.82463
		0.02996	30.06624	0.02996	21.58401	0.02996	27.03652	0.02996	21.16221	0.02996	20.8276	0.02996	21.64232
		0.03996	32.0753	0.03996	23.14777	0.03996	28.32059	0.03996	21.86667	0.03996	21.83822	0.03996	22.43015
		0.04996	34.13475	0.04996	24.66157	0.04996	29.57226	0.04996	22.52045	0.04996	22.79406	0.04996	23.12753
		0.05996	36.25449	0.05996	26.20594	0.05996	30.83808	0.05996	23.18018	0.05996	23.75839	0.05996	23.80085
		0.06996	38.39023	0.06996	27.77481	0.06996	32.07459	0.06996	23.82732	0.06996	24.70502	0.06996	24.45464
		0.07988	40.52725	0.07988	29.37254	0.07988	33.43921	0.07988	24.57367	0.07988	25.69936	0.07988	25.06454
		0.08988	42.70205	0.08988	31.03623	0.08988	34.78754	0.08988	25.30786	0.08988	26.66865	0.08988	25.65138
		0.09988	44.87714	0.09988	32.73786	0.09988	36.10757	0.09988	26.01359	0.09988	27.5949	0.09988	26.16971
		0.10988	47.0828	0.10988	34.40396	0.10988	37.44883	0.10988	26.78684	0.10988	28.58018	0.10988	26.75471
		0.11988	49.36391	0.11988	36.0402	0.11988	38.80481	0.11988	27.58245	0.11988	29.52102	0.11988	27.41047
		0.12988	51.71338	0.12988	37.73107	0.12988	40.20226	0.12988	28.50248	0.12988	30.54183	0.12988	28.07714
		0.13988	54.06157	0.13988	39.44515	0.13988	41.59901	0.13988	29.47841	0.13988	31.47629	0.13988	28.77608
		0.14988	56.39632	0.14988	41.19745	0.14988	43.00524	0.14988	30.4385	0.14988	32.37764	0.14988	29.43071
		0.15988	58.78061	0.15988	43.03779	0.15988	44.43086	0.15988	31.4259	0.15988	33.27615	0.15988	30.09243
		0.16988	61.28224	0.16988	44.8913	0.16988	45.89455	0.16988	32.4552	0.16988	34.16702	0.16988	30.80396
		0.17988	63.93489	0.17988	46.84996	0.17988	47.35924	0.17988	33.56391	0.17988	35.11083	0.17988	31.52569
		0.18988	66.63907	0.18988	48.88096	0.18988	48.81316	0.18988	34.69257	0.18988	36.03496	0.18988	32.28478
		0.19988	69.3741	0.19988	50.90545	0.19988	50.31975	0.19988	35.86978	0.19988	37.01571	0.19988	32.99943
		0.20988	72.20127	0.20988	52.97863	0.20988	51.9104	0.20988	37.04487	0.20988	37.96773	0.20988	33.79122
		0.21981	75.16943	0.21981	55.19264	0.21981	53.5983	0.21981	38.24487	0.21981	38.97381	0.21981	34.6
		0.22981	78.16334	0.22981	57.4719	0.22981	55.29979	0.22981	39.53376	0.22981	39.98712	0.22981	35.4276
		0.2398	81.25605	0.2398	59.85322	0.2398	57.07417	0.2398	40.83751	0.2398	40.99816	0.2398	36.27912
		0.24981	84.41571	0.24981	62.30771	0.24981	58.86822	0.24981	42.21076	0.24981	42.06695	0.24981	37.07389
		0.25981	87.69866	0.25981	64.78316	0.25981	60.71607	0.25981	43.58018	0.25981	43.15485	0.25981	37.92795
		0.26981	91.13489	0.26981	67.4218	0.26981	62.69342	0.26981	44.93616	0.26981	44.26893	0.26981	38.77976
		0.27981	94.67558	0.27981	70.10941	0.27981	64.64048	0.27981	46.28818	0.27981	45.3799	0.27981	39.62392
		0.2898	98.37169	0.2898	72.90757	0.2898	66.69229	0.2898	47.68818	0.2898	46.53248	0.2898	40.50955
		0.29981	102.2242	0.29981	75.80212	0.29981	68.83595	0.29981	49.16914	0.29981	47.71607	0.29981	41.41713
		0.30981	106.29851	0.30981	78.82321	0.30981	71.15824	0.30981	50.65407	0.30981	48.95556	0.30981	42.36858
		0.31981	110.42519	0.31981	81.92527	0.31981	73.57028	0.31981	52.20311	0.31981	50.23737	0.31981	43.3397
		0.32981	114.662	0.32981	85.09243	0.32981	75.99052	0.32981	53.71196	0.32981	51.46483	0.32981	44.31507
		0.33981	119.04897	0.33981	88.26893	0.33981	78.45662	0.33981	55.27233	0.33981	52.74494	0.33981	45.26822
		0.34981	123.58457	0.34981	91.58627	0.34981	80.99434	0.34981	56.89809	0.34981	54.03779	0.34981	46.27318
		0.35973	128.36447	0.35973	95.04657	0.35973	83.69738	0.35973	58.56957	0.35973	55.43114	0.35973	47.32399
		0.36973	133.27516	0.36973	98.56815	0.36973	86.48846	0.36973	60.32838	0.36973	56.89328	0.36973	48.45195
		0.37973	138.28818	0.37973	102.22647	0.37973	89.34947	0.37973	62.12399	0.37973	58.37891	0.37973	49.64091
		0.38973	143.45506	0.38973	105.90276	0.38973	92.2712	0.38973	64.01472	0.38973	59.96037	0.38973	50.92074
		0.39973	148.89172	0.39973	109.76079	0.39973	95.31564	0.39973	65.96589	0.39973	61.5373	0.39973	52.29483
		0.40973	154.45435	0.40973	113.81713	0.40973	98.4586	0.40973	67.96546	0.40973	63.26313	0.40973	53.69059
		0.41973	160.22788	0.41973	117.94961	0.41973	101.7414	0.41973	70.01854	0.41973	65.05067	0.41973	55.18627
		0.42973	166.14013	0.42973	122.18669	0.42973	105.13999	0.42973	72.11238	0.42973	66.89554	0.42973	56.69823
		0.43973	172.23213	0.43973	126.57339	0.43973	108.68139	0.43973	74.33503	0.43973	68.82519	0.43973	58.36065
		0.44973	178.64827	0.44973	131.1574	0.44973	112.43779	0.44973	76.67516	0.44973	70.86695	0.44973	60.16391
		0.45973	185.25407	0.45973	135.96745	0.45973	116.27176	0.45973	79.12243	0.45973	73.05563	0.45973	62.03524
		0.46973	192.07219	0.46973	140.83793	0.46973	120.22887	0.46973	81.73263	0.46973	75.34168	0.46973	64.03015
		0.47973	199.11536	0.47973	145.87969	0.47973	124.35372	0.47973	84.43142	0.47973	77.7564	0.47973	66.11479
		0.48973	206.4954	0.48973	151.17905	0.48973	128.66044	0.48973	87.30517	0.48973	80.23921	0.48973	68.29172
		0.49973	214.18542	0.49973	156.66384	0.49973	133.16943	0.49973	90.23992	0.49973	82.87346	0.49973	70.58217
		0.50965	222.1189	0.50965	162.43029	0.50965	137.91706	0.50965	93.32031	0.50965	85.55485	0.50965	73.02335
		0.51965	230.42746	0.51965	168.40198	0.51965	142.81953	0.51965	96.53022	0.51965	88.33347	0.51965	75.54168
		0.52965	239.1649	0.52965	174.65676	0.52965	147.92074	0.52965	99.85534	0.52965	91.26667	0.52965	78.17863
		0.53965	248.46568	0.53965	181.35456	0.53965	153.34183	0.53965	103.39391	0.53965	94.34112	0.53965	80.90403
		0.54965	258.18117	0.54965	188.39774	0.54965	159.02335	0.54965	107.04289	0.54965	97.58075	0.54965	83.66582
		0.55965	268.24628	0.55965	195.79052	0.55965	165.06016	0.55965	110.8988	0.55965	101.00113	0.55965	86.65577
		0.56965	278.79689	0.56965	203.56546	0.56965	171.4126	0.56965	114.94168	0.56965	104.67162	0.56965	89.91493
		0.57965	289.96461	0.57965	211.79476	0.57965	178.14437	0.57965	119.23213	0.57965	108.65237	0.57965	93.48889
		0.58965	301.76504	0.58965	220.41614	0.58965	185.29512	0.58965	123.82378	0.58965	112.95711	0.58965	97.41996
		0.59965	314.17834	0.59965	229.58103	0.59965	192.88181	0.59965	128.79222	0.59965	117.62916	0.59965	101.67587
		0.60965	327.22576	0.60965	239.23992	0.60965	201.11677	0.60965	134.22222	0.60965	122.85195	0.60965	106.39774
		0.61965	340.95824	0.61965	249.46638	0.61965	209.93631	0.61965	140.2092	0.61965	128.71522	0.61965	111.64076
		0.62965	355.63482	0.62965	260.54352	0.62965	219.63765	0.62965	146.82378	0.62965	135.47969	0.62965	117.57042
		0.63965	371.1012	0.63965	272.29016	0.63965	230.1189	0.63965	154.23355	0.63965	143.1833	0.63965	124.24501
		0.64957	387.48337	0.64957	284.79406	0.64957	241.53999	0.64957	162.50672	0.64957	151.97877	0.64957	131.8719
		0.65957	404.73885	0.65957	298.1288	0.65957	254.09625	0.65957	171.91083	0.65957	162.06228	0.65957	140.56348
		0.66957	423.04317	0.66957	312.35669	0.66957	267.91932	0.66957	182.69781	0.66957	173.59094	0.66957	150.47134
		0.67957	442.74593	0.67957	327.87827	0.67957	283.42675	0.67957	194.99788	0.67957	186.8719	0.67957	161.8075
		0.68957	463.61642	0.68957	344.60439	0.68957	300.53786	0.68957	209.02335	0.68957	202.08351	0.68957	174.52654
		0.69957	485.73956	0.69957	362.65959	0.69957	319.41118	0.69957	224.82095	0.69957	219.28521	0.69957	188.84643
		0.70957	509.08422	0.70957	382.20524	0.70957	340.20948	0.70957	242.60156	0.70957	238.73319	0.70957	204.93701
		0.71957	533.98585	0.71957	403.28804	0.71957	363.14084	0.71957	262.70205	0.71957	260.6143	0.71957	222.99646
		0.72957	560.50389	0.72957	426.29724	0.72957	388.55768	0.72957	285.26964	0.72957	285.19038	0.72957	243.26398
		0.73957	588.73036	0.73957	451.20453	0.73957	416.52088	0.73957	310.54494	0.73957	312.76999	0.73957	265.92923
		0.74957	618.63411	0.74957	478.41755	0.74957	447.31352	0.74957	338.6879	0.74957	343.52866	0.74957	291.30644
		0.75957	650.62279	0.75957	508.11182	0.75957	481.1833	0.75957	369.93772	0.75957	377.82449	0.75957	319.72965
		0.76957	685.08422	0.76957	540.6879	0.76957	518.59731	0.76957	404.77849	0.76957	416.1925	0.76957	351.72116
		0.77957	721.57537	0.77957	576.13305	0.77957	559.52017	0.77957	443.2385	0.77957	458.86341	0.77957	387.59236
		0.78949	760.36235	0.78949	614.68365	0.78949	604.24204	0.78949	485.77636	0.78949	506.44586	0.78949	427.91083
		0.7995	801.28238	0.7995	656.59448	0.7995	653.22293	0.7995	532.73602	0.7995	559.4862	0.7995	473.23567
		0.80949	844.78415	0.80949	702.31281	0.80949	706.99929	0.80949	584.65959	0.80949	618.75584	0.80949	524.37367
		0.81949	891.11111	0.81949	752.2845	0.81949	765.94055	0.81949	641.98585	0.81949	684.86907	0.81949	581.96603
		0.82949	939.88252	0.82949	806.77282	0.82949	830.35952	0.82949	705.04883	0.82949	758.50955	0.82949	646.954
		0.8395	991.35456	0.8395	866.29016	0.8395	900.78839	0.8395	774.49398	0.8395	840.63553	0.8395	720.38924
		0.8495	1045.73248	0.8495	931.20453	0.8495	977.8075	0.8495	851.14508	0.8495	932.31564	0.8495	803.1833
		0.8595	1103.31352	0.8595	1002.38075	0.8595	1062.38075	0.8595	935.96745	0.8595	1035.08705	0.8595	897.1465
		0.8695	1163.99858	0.8695	1079.9816	0.8695	1154.67516	0.8695	1029.36872	0.8695	1149.65888	0.8695	1002.97523
		0.8795	1228.0368	0.8795	1164.42463	0.8795	1255.32767	0.8795	1132.08351	0.8795	1277.27813	0.8795	1122.18825
		0.8895	1295.38854	0.8895	1256.48266	0.8895	1365.18754	0.8895	1245.19462	0.8895	1419.30644	0.8895	1256.49682
		0.8995	1366.46426	0.8995	1356.74876	0.8995	1485.33616	0.8995	1369.77212	0.8995	1577.46638	0.8995	1407.34466
		0.9095	1441.86837	0.9095	1466.7799	0.9095	1617.65039	0.9095	1507.99717	0.9095	1753.99858	0.9095	1577.49469
		0.9195	1521.18896	0.9195	1586.68082	0.9195	1762.6327	0.9195	1660.58033	0.9195	1949.96461	0.9195	1767.86978
		0.92942	1604.99646	0.92942	1717.21161	0.92942	1921.6419	0.92942	1828.64827	0.92942	2166.86483	0.92942	1980.32555
		0.93942	1693.14933	0.93942	1859.47629	0.93942	2095.65464	0.93942	2014.29582	0.93942	2406.11465	0.93942	2216.44728
		0.94942	1785.93064	0.94942	2014.67799	0.94942	2285.9448	0.94942	2218.79689	0.94942	2669.35598	0.94942	2477.46638
		0.95942	1883.90658	0.95942	2184.50106	0.95942	2494.42321	0.95942	2444.1472	0.95942	2957.69285	0.95942	2765.27955
		0.96942	1987.615	0.96942	2370.48832	0.96942	2722.17976	0.96942	2691.94621	0.96942	3273.16348	0.96942	3080.36801
		0.97942	2097.08422	0.97942	2574.12597	0.97942	2970.84218	0.97942	2963.02902	0.97942	3615.6971	0.97942	3423.87827
		0.98942	2212.55485	0.98942	2797.69285	0.98942	3242.39207	0.98942	3259.51875	0.98942	3986.7799	0.98942	3797.82024
		0.99942	2334.84784	0.99942	3043.82166	0.99942	3538.59873	0.99942	3584.04812	0.99942	4387.85563	0.99942	4202.37792
		1.00942	2462.77424	1.00942	3312.7247	1.00942	3859.5046	1.00942	3935.75372	1.00942	4817.07006	1.00942	4637.60793
		1.01942	2597.62208	1.01942	3607.16207	1.01942	4206.75159	1.01942	4316.22081	1.01942	5277.70701	1.01942	5103.52442
		1.02942	2739.29229	1.02942	3928.4218	1.02942	4579.6603	1.02942	4727.13376	1.02942	5768.35103	1.02942	5598.75442
		1.03942	2887.84147	1.03942	4279.23567	1.03942	4980.94834	1.03942	5167.96886	1.03942	6289.53999	1.03942	6125.138
		1.04942	3043.77919	1.04942	4660.87757	1.04942	5410.2477	1.04942	5640.8351	1.04942	6883.36872	1.04942	6712.37084
		1.05942	3205.81741	1.05942	5073.77212	1.05942	5866.72328	1.05942	6143.9632	1.05942	7505.6051	1.05942	7347.13376
		1.06942	3423.59519	1.06942	5649.96461	1.06942	6474.84784	1.06942	6804.85492	1.06942	8072.58316	1.06942	7943.34041
		1.07934	3625.9448	1.07934	6196.3482	1.07934	7054.16844	1.07934	7440.9908	1.07934	8536.92852	1.07934	8461.25973
		1.08934	3748.78981	1.08934	6541.8259	1.08934	7441.28804	1.08934	7878.89597	1.08934	8816.00849	1.08934	8786.31281
		1.09934	3736.70205	1.09934	6540.59448	1.09934	7493.07856	1.09934	7966.73744	1.09934	8895.81033	1.09934	8864.71338
		1.08934	3549.29936	1.08934	6088.4218	1.08934	7100.97665	1.08934	7588.53503	1.08934	8750.5874	1.08934	8698.79689
		1.07934	3310.7431	1.07934	5522.42038	1.07934	6574.0552	1.07934	7060.38217	1.07934	8348.74735	1.07934	8258.14579
		1.06942	3043.66596	1.06942	4900.92003	1.06942	5968.81812	1.06942	6441.50035	1.06942	7776.23496	1.06942	7669.56829
		1.05942	2774.94692	1.05942	4295.03185	1.05942	5354.7063	1.05942	5806.00142	1.05942	7147.07714	1.05942	7029.76645
		1.04942	2525.67587	1.04942	3757.74947	1.04942	4786.34112	1.04942	5211.04034	1.04942	6504.17551	1.04942	6380.76433
		1.03942	2294.8903	1.03942	3282.05237	1.03942	4261.44374	1.03942	4656.20665	1.03942	5881.6419	1.03942	5758.57042
		1.02942	2084.74168	1.02942	2870.60156	1.02942	3787.58669	1.02942	4149.80892	1.02942	5297.22576	1.02942	5175.25832
		1.01942	1893.3758	1.01942	2515.01769	1.01942	3360.02831	1.01942	3689.29936	1.01942	4751.0828	1.01942	4631.21019
		1.00942	1718.30149	1.00942	2206.70913	1.00942	2975.58386	1.00942	3270.67233	1.00942	4247.41684	1.00942	4128.95966
		0.99942	1558.34395	0.99942	1940.01415	0.99942	2631.42251	0.99942	2892.8804	0.99942	3784.13305	0.99942	3666.49682
		0.98942	1412.07643	0.98942	1708.22364	0.98942	2323.93489	0.98942	2552.80962	0.98942	3359.20736	0.98942	3242.06653
		0.97942	1278.98089	0.97942	1506.73744	0.97942	2050.16277	0.97942	2247.79901	0.97942	2972.08776	0.97942	2856.15004
		0.96942	1157.78769	0.96942	1331.20736	0.96942	1806.86483	0.96942	1975.96603	0.96942	2620.79264	0.96942	2506.75159
		0.95942	1048.20948	0.95942	1178.12173	0.95942	1591.87544	0.95942	1734.79122	0.95942	2304.51522	0.95942	2192.42746
		0.94942	949.08563	0.94942	1044.41614	0.94942	1402.54211	0.94942	1522.03822	0.94942	2021.71267	0.94942	1912.13022
		0.93942	859.4494	0.93942	927.14084	0.93942	1236.10616	0.93942	1335.15782	0.93942	1769.908	0.93942	1663.35456
		0.92942	778.56617	0.92942	823.69002	0.92942	1089.74805	0.92942	1170.8804	0.92942	1546.65251	0.92942	1443.53857
		0.9195	705.71267	0.9195	732.49682	0.9195	961.63765	0.9195	1027.54282	0.9195	1350.36377	0.9195	1251.44232
		0.9095	640.24204	0.9095	651.88393	0.9095	849.54989	0.9095	902.43878	0.9095	1178.50672	0.9095	1084.18684
		0.8995	581.48054	0.8995	580.49257	0.8995	751.50743	0.8995	793.32767	0.8995	1028.67941	0.8995	939.36023
		0.8895	528.6879	0.8895	517.19887	0.8895	665.64756	0.8895	698.13447	0.8895	898.37367	0.8895	814.21798
		0.8795	481.12385	0.8795	460.93135	0.8795	590.25761	0.8795	614.70488	0.8795	784.93135	0.8795	706.08493
		0.8695	438.46001	0.8695	411.13517	0.8695	524.11323	0.8695	541.77495	0.8695	686.47134	0.8695	612.89597
		0.8595	400.1288	0.8595	367.08988	0.8595	465.95895	0.8595	477.89101	0.8595	601.03751	0.8595	532.72328
		0.8495	365.6334	0.8495	328.20524	0.8495	414.77849	0.8495	421.86129	0.8495	526.84784	0.8495	463.68153
		0.8395	334.59306	0.8395	293.84572	0.8395	369.56688	0.8395	372.59873	0.8395	462.31706	0.8395	404.18117
		0.82949	306.48691	0.82949	263.39137	0.82949	329.55839	0.82949	329.09696	0.82949	406	0.82949	352.70771
		0.81949	281.1196	0.81949	236.44444	0.81949	294.09766	0.81949	290.71621	0.81949	356.8535	0.81949	308.12456
		0.80949	258.13022	0.80949	212.5959	0.80949	262.54636	0.80949	256.68648	0.80949	313.82024	0.80949	269.40835
		0.7995	237.29087	0.7995	191.47346	0.7995	234.45577	0.7995	226.47983	0.7995	276.08634	0.7995	235.70701
		0.78949	218.33829	0.78949	172.64685	0.78949	209.28946	0.78949	199.57254	0.78949	242.71762	0.78949	206.14862
		0.77957	201.07148	0.77957	155.8811	0.77957	186.73602	0.77957	175.47346	0.77957	213.21019	0.77957	180.26469
		0.76957	185.33475	0.76957	140.86016	0.76957	166.48125	0.76957	153.92074	0.76957	187.046	0.76957	157.47629
		0.75957	170.98938	0.75957	127.38344	0.75957	148.22081	0.75957	134.55131	0.75957	163.76645	0.75957	137.31791
		0.74957	157.89809	0.74957	115.28691	0.74957	131.70729	0.74957	117.05336	0.74957	143.00637	0.74957	119.42675
		0.73957	145.94338	0.73957	104.33645	0.73957	116.67502	0.73957	101.3523	0.73957	124.38627	0.73957	103.44742
		0.72957	134.98698	0.72957	94.44487	0.72957	102.98415	0.72957	87.16759	0.72957	107.69299	0.72957	89.16461
		0.71957	124.92442	0.71957	85.51012	0.71957	90.54607	0.71957	74.43057	0.71957	92.7087	0.71957	76.3414
		0.70957	115.66398	0.70957	77.39023	0.70957	79.26709	0.70957	62.9632	0.70957	79.22803	0.70957	64.91295
		0.69957	107.0627	0.69957	70.04572	0.69957	68.97452	0.69957	52.54338	0.69957	67.07686	0.69957	54.58344
		0.68957	99.10432	0.68957	63.37622	0.68957	59.62236	0.68957	43.20142	0.68957	56.17311	0.68957	45.37849
		0.67957	91.80793	0.67957	57.35343	0.67957	51.21104	0.67957	34.7959	0.67957	46.42251	0.67957	37.1472
		0.66957	85.08422	0.66957	51.81246	0.66957	43.68096	0.66957	27.32527	0.66957	37.73631	0.66957	29.73744
		0.65957	78.86808	0.65957	46.82803	0.65957	36.95456	0.65957	20.71649	0.65957	30.03454	0.65957	23.16447
		0.64957	73.07389	0.64957	42.24515	0.64957	30.93206	0.64957	14.87672	0.64957	23.21132	0.64957	17.27757
		0.63965	67.65563	0.63965	38.09795	0.63965	25.55004	0.63965	9.74746	0.63965	17.28054	0.63965	12.02794
		0.62965	62.57226	0.62965	34.33263	0.62965	20.75471	0.62965	5.23955	0.62965	12.04454	0.62965	7.48904
		0.61965	57.81656	0.61965	30.82194	0.61965	16.47728	0.61965	1.25843	0.61965	7.43186	0.61965	3.44125
		0.60965	53.37764	0.60965	27.62321	0.60965	12.5879	0.60965	-2.25734	0.60965	3.34743	0.60965	-0.14568
		0.59965	49.13673	0.59965	24.60071	0.59965	9.07633	0.59965	-5.38611	0.59965	-0.30217	0.59965	-3.36545
		0.58965	45.19207	0.58965	21.76745	0.58965	5.89124	0.58965	-8.15333	0.58965	-3.4696	0.58965	-6.28347
		0.57965	41.40283	0.57965	19.04416	0.57965	2.97931	0.57965	-10.64341	0.57965	-6.31718	0.57965	-8.8712
		0.56965	37.78797	0.56965	16.46228	0.56965	0.34548	0.56965	-12.90525	0.56965	-8.84007	0.56965	-11.24788
		0.55965	34.33772	0.55965	14.01428	0.55965	-2.20317	0.55965	-15.0017	0.55965	-11.18667	0.55965	-13.4089
		0.54965	31.0201	0.54965	11.66289	0.54965	-4.55551	0.54965	-16.92965	0.54965	-13.31442	0.54965	-15.41741
		0.53965	27.81812	0.53965	9.39059	0.53965	-6.77141	0.53965	-18.70828	0.53965	-15.27686	0.53965	-17.28917
		0.52965	24.74536	0.52965	7.14602	0.52965	-8.87635	0.52965	-20.3874	0.52965	-17.12413	0.52965	-18.97806
		0.51965	21.69965	0.51965	4.87963	0.51965	-10.90041	0.51965	-21.9356	0.51965	-18.85067	0.51965	-20.54437
		0.50965	18.69894	0.50965	2.62694	0.50965	-12.99223	0.50965	-23.42491	0.50965	-20.49639	0.50965	-21.93843
		0.49973	15.75499	0.49973	0.35803	0.49973	-15.07615	0.49973	-24.80127	0.49973	-22.03298	0.49973	-23.2586
		0.48973	12.80771	0.48973	-1.88524	0.48973	-17.12371	0.48973	-26.14848	0.48973	-23.50347	0.48973	-24.53843
		0.47973	9.9035	0.47973	-4.11628	0.47973	-19.12909	0.47973	-27.49597	0.47973	-24.94055	0.47973	-25.81628
		0.46973	6.96897	0.46973	-6.40549	0.46973	-21.16815	0.46973	-28.84119	0.46973	-26.36348	0.46973	-27.10163
		0.45973	4.07193	0.45973	-8.77829	0.45973	-23.19689	0.45973	-30.16787	0.45973	-27.74536	0.45973	-28.4051
		0.44973	1.18348	0.44973	-11.135	0.44973	-25.27884	0.44973	-31.45209	0.44973	-29.0896	0.44973	-29.72739
		0.43973	-1.68368	0.43973	-13.51781	0.43973	-27.4041	0.43973	-32.74522	0.43973	-30.39561	0.43973	-31.00255
		0.42973	-4.61127	0.42973	-16.00255	0.42973	-29.57396	0.42973	-34.07884	0.42973	-31.74621	0.42973	-32.26582
		0.41973	-7.64226	0.41973	-18.54197	0.41973	-31.75131	0.41973	-35.47771	0.41973	-33.10333	0.41973	-33.46936
		0.40973	-10.68667	0.40973	-21.23892	0.40973	-33.92328	0.40973	-36.81458	0.40973	-34.3966	0.40973	-34.66086
		0.39973	-13.79758	0.39973	-24.00708	0.39973	-36.06638	0.39973	-38.14055	0.39973	-35.67969	0.39973	-35.87771
		0.38973	-16.89257	0.38973	-26.83581	0.38973	-38.30205	0.38973	-39.44345	0.38973	-36.89498	0.38973	-37.07643
		0.37973	-20.0535	0.37973	-29.83454	0.37973	-40.50375	0.37973	-40.72838	0.37973	-38.11932	0.37973	-38.26907
		0.36973	-23.3029	0.36973	-32.74749	0.36973	-42.71139	0.36973	-42.02364	0.36973	-39.37297	0.36973	-39.43977
		0.35973	-26.55725	0.35973	-35.65577	0.35973	-45.00142	0.35973	-43.27105	0.35973	-40.59816	0.35973	-40.57268
		0.34981	-29.83312	0.34981	-38.51932	0.34981	-47.19731	0.34981	-44.50106	0.34981	-41.82024	0.34981	-41.6586
		0.33981	-33.10644	0.33981	-41.33347	0.33981	-49.45506	0.33981	-45.70941	0.33981	-42.96164	0.33981	-42.72456
		0.32981	-36.47205	0.32981	-44.20679	0.32981	-51.6351	0.32981	-46.87941	0.32981	-44.0896	0.32981	-43.75612
		0.31981	-39.79023	0.31981	-46.98174	0.31981	-53.70517	0.31981	-48.01486	0.31981	-45.14621	0.31981	-44.75287
		0.30981	-43.09922	0.30981	-49.64204	0.30981	-55.73744	0.30981	-49.12795	0.30981	-46.13772	0.30981	-45.7097
		0.29981	-46.26285	0.29981	-52.16801	0.29981	-57.60127	0.29981	-50.10828	0.29981	-47.06299	0.29981	-46.54692
		0.2898	-49.27587	0.2898	-54.49809	0.2898	-59.35103	0.2898	-51.05322	0.2898	-47.92597	0.2898	-47.33008
		0.27981	-52.11663	0.27981	-56.60382	0.27981	-60.96008	0.27981	-51.89356	0.27981	-48.75513	0.27981	-47.9959
		0.26981	-54.67587	0.26981	-58.52442	0.26981	-62.39434	0.26981	-52.63836	0.26981	-49.48195	0.26981	-48.63071
		0.25981	-57.03312	0.25981	-60.21345	0.25981	-63.70134	0.25981	-53.29766	0.25981	-50.13574	0.25981	-49.27275
		0.24981	-59.1765	0.24981	-61.66964	0.24981	-64.88323	0.24981	-53.82307	0.24981	-50.74154	0.24981	-49.83808
		0.2398	-61.23454	0.2398	-63.02251	0.2398	-65.99122	0.2398	-54.34947	0.2398	-51.33121	0.2398	-50.4051
		0.22981	-63.03977	0.22981	-64.19264	0.22981	-67.00962	0.22981	-54.81472	0.22981	-51.91776	0.22981	-50.96164
		0.21981	-64.67827	0.21981	-65.1598	0.21981	-67.8971	0.21981	-55.2811	0.21981	-52.36575	0.21981	-51.47261
		0.20988	-66.19377	0.20988	-66.02718	0.20988	-68.64317	0.20988	-55.70205	0.20988	-52.80311	0.20988	-52.01783
		0.19988	-67.60694	0.19988	-66.69498	0.19988	-69.3097	0.19988	-56.11677	0.19988	-53.2242	0.19988	-52.52427
		0.18988	-68.98641	0.18988	-67.28224	0.18988	-69.91946	0.18988	-56.57127	0.18988	-53.63878	0.18988	-52.93602
		0.17988	-70.26384	0.17988	-67.81387	0.17988	-70.46921	0.17988	-57.00241	0.17988	-54.10318	0.17988	-53.39731
		0.16988	-71.44968	0.16988	-68.27573	0.16988	-70.99717	0.16988	-57.39264	0.16988	-54.49398	0.16988	-53.83808
		0.15988	-72.60849	0.15988	-68.71649	0.15988	-71.50474	0.15988	-57.79844	0.15988	-54.90856	0.15988	-54.32512
		0.14988	-73.81033	0.14988	-69.13984	0.14988	-72.06681	0.14988	-58.21515	0.14988	-55.27346	0.14988	-54.82944
		0.13988	-74.95202	0.13988	-69.45308	0.13988	-72.59052	0.13988	-58.60623	0.13988	-55.61033	0.13988	-55.31238
		0.12988	-76.02647	0.12988	-69.65874	0.12988	-73.1138	0.12988	-58.99901	0.12988	-55.94013	0.12988	-55.79462
		0.11988	-77.01699	0.11988	-69.88634	0.11988	-73.55754	0.11988	-59.34834	0.11988	-56.30248	0.11988	-56.28054
		0.10988	-77.97806	0.10988	-70.14791	0.10988	-74.0218	0.10988	-59.78301	0.10988	-56.65633	0.10988	-56.81047
		0.09988	-79.02887	0.09988	-70.40849	0.09988	-74.52979	0.09988	-60.25888	0.09988	-56.97381	0.09988	-57.31791
		0.08988	-80.06044	0.08988	-70.67615	0.08988	-74.99986	0.08988	-60.67176	0.08988	-57.31904	0.08988	-57.88408
		0.07988	-81.10403	0.07988	-70.88195	0.07988	-75.56645	0.07988	-61.0477	0.07988	-57.6661	0.07988	-58.42335
		0.06996	-82.20962	0.06996	-71.13404	0.06996	-76.08662	0.06996	-61.40085	0.06996	-58.09016	0.06996	-58.94961
		0.05996	-83.29257	0.05996	-71.44076	0.05996	-76.67318	0.05996	-61.79802	0.05996	-58.57056	0.05996	-59.51975
		0.04996	-84.41911	0.04996	-71.77962	0.04996	-77.28408	0.04996	-62.23666	0.04996	-59.05067	0.04996	-60.08648
		0.03996	-85.49568	0.03996	-72.09271	0.03996	-77.90587	0.03996	-62.67926	0.03996	-59.55541	0.03996	-60.69696
		0.02996	-86.5564	0.02996	-72.42803	0.02996	-78.60849	0.02996	-63.13022	0.02996	-60.04246	0.02996	-61.27997
		0.01996	-87.65294	0.01996	-72.7891	0.01996	-79.27304	0.01996	-63.61812	0.01996	-60.53815	0.01996	-61.8954
		0.00996	-88.83383	0.00996	-73.26285	0.00996	-79.96999	0.00996	-64.13871	0.00996	-61.11323	0.00996	-62.62194
		-3.91006E-5	-90.00623	-3.91006E-5	-73.81585	-3.91006E-5	-80.68181	-3.91006E-5	-64.67587	-3.91006E-5	-61.73631	-3.91006E-5	-63.34409
		-0.01004	-91.26242	-0.01004	-74.38669	-0.01004	-81.37466	-0.01004	-65.185	-0.01004	-62.369	-0.01004	-64.11691
		-0.02004	-92.56093	-0.02004	-74.98882	-0.02004	-82.13263	-0.02004	-65.71451	-0.02004	-63.01769	-0.02004	-64.92413
		-0.03004	-93.87389	-0.03004	-75.58698	-0.03004	-82.90856	-0.03004	-66.27403	-0.03004	-63.67997	-0.03004	-65.80071
		-0.04004	-95.2552	-0.04004	-76.29229	-0.04004	-83.64105	-0.04004	-66.93786	-0.04004	-64.38273	-0.04004	-66.73263
		-0.05004	-96.61684	-0.05004	-77.05081	-0.05004	-84.39844	-0.05004	-67.66921	-0.05004	-65.06044	-0.05004	-67.65803
		-0.06004	-98.06072	-0.06004	-77.91069	-0.06004	-85.17396	-0.06004	-68.42208	-0.06004	-65.70998	-0.06004	-68.57636
		-0.06996	-99.58854	-0.06996	-78.91762	-0.06996	-86.06822	-0.06996	-69.21727	-0.06996	-66.45025	-0.06996	-69.45011
		-0.07996	-101.22803	-0.07996	-79.9758	-0.07996	-87.14593	-0.07996	-69.97933	-0.07996	-67.31437	-0.07996	-70.35414
		-0.08996	-102.89356	-0.08996	-81.09271	-0.08996	-88.24699	-0.08996	-70.76631	-0.08996	-68.20156	-0.08996	-71.23878
