# Supplementary material for: The methanol electrooxidation activity and the CO-resilient surface of a La x Fe 1− y − z Cu y Pd z O 3 perovskite
Source: Royal Society of Chemistry journal article supplement (doi:10.1039/d5ta04846j), 2026-01-01
Supplement: d5ta04846j9.xlsx [file d5ta04846j9.xlsx]

## Sheet: Feuil1
		c MeOH	j microA/cm2 at 1.1 V	j microA/cm2 at 0.8 V			log c	log j at 1.1 V	log j at 0.8 V
		0.1	1403.63	207			-1	3.14725	2.31597
		0.2	1876	314			-0.69897	3.27323	2.49693
		0.5	3384.85	461			-0.30103	3.52954	2.6637
		1	4399.8	483			0	3.64343	2.68395
		1.5	5974.49	451			0.17609	3.7763	2.65418
		2	6196.51	406			0.30103	3.79215	2.60853
