# Supplementary material for: The methanol electrooxidation activity and the CO-resilient surface of a La x Fe 1− y − z Cu y Pd z O 3 perovskite
Source: Royal Society of Chemistry journal article supplement (doi:10.1039/d5ta04846j), 2026-01-01
Supplement: d5ta04846j10.xlsx [file d5ta04846j10.xlsx]

## Sheet: Feuil1
				mV / dec				mV / dec
		MeOH c	regression slope	1e3/reg slope	alpha		regression slope	1e3/reg slope	alpha
		0.1	7.1791	139.29323	0.42435		7.1725	139.4214	0.42396
		0.2	13.9868	71.49598	0.82675		6.09107	164.17477	0.36004
		0.5	13.91311	71.87466	0.82239		6.446	155.13497	0.38102
		1	16.55885	60.39067	0.97878		7.4983	133.36356	0.44322
		1.5	17.21367	58.09336	1.01749		9.0406	110.61213	0.53438
		2	15.9948	62.52032	0.94544		9.4762	105.52753	0.56013
